# Supplementary material for: Unsymmetrical tetrasubstituted ureas from tertiary carbamoylimidazole: activation by AlMe3
Source: Royal Society of Chemistry journal article supplement (doi:10.1039/c2ob25412c), 2012-01-01

# **Unsymmetrical Tetrasubstituted Ureas from *tertiary* Carbamoylimidazole: activation by AlMe<sub>3</sub>.**

**A.Velavan, S. Sumathi,\* K. K. Balasubramanian \***

**Department of chemistry, Hindustan University.**

**Rajiv Gandhi Salai, Padur, (Via) Kelambakkam, Chennai - 603 103,  
India.**

E-mail: kkbalu@hotmail.com, sumathi@hindustanuniv.ac.in

## **SUPPORTING INFORMATION**

### **Table of Contents**

**General Information -----S2**

**Copies of <sup>1</sup>H and <sup>13</sup>C spectra -----S3-S76**

### **General Information:**

All reactions were conducted under an atmosphere of dry nitrogen in oven dried glassware.

Dichloromethane and toluene were obtained by distillation from calcium hydride under nitrogen, and stored with dried molecular sieves.

Amines were dried over KOH and passed over activated alumina before use. Me<sub>3</sub>Al (2M in toluene) was purchased from Aldrich. All the products obtained were purified by column chromatography using silica gel (100-200 mesh). <sup>1</sup>H and <sup>13</sup>C NMR were recorded in 300 MHz spectrometer in CDCl<sub>3</sub> or DMSO-d<sub>6</sub> at ambient temperature. Chemical shifts (δ) are reported in ppm using TMS as internal standard and spin-spin coupling constants (*J*) are given in Hz. The high resolution mass spectra (HRMS) were measured by ESI. Melting points were measured in open capillary tubes and are uncorrected.

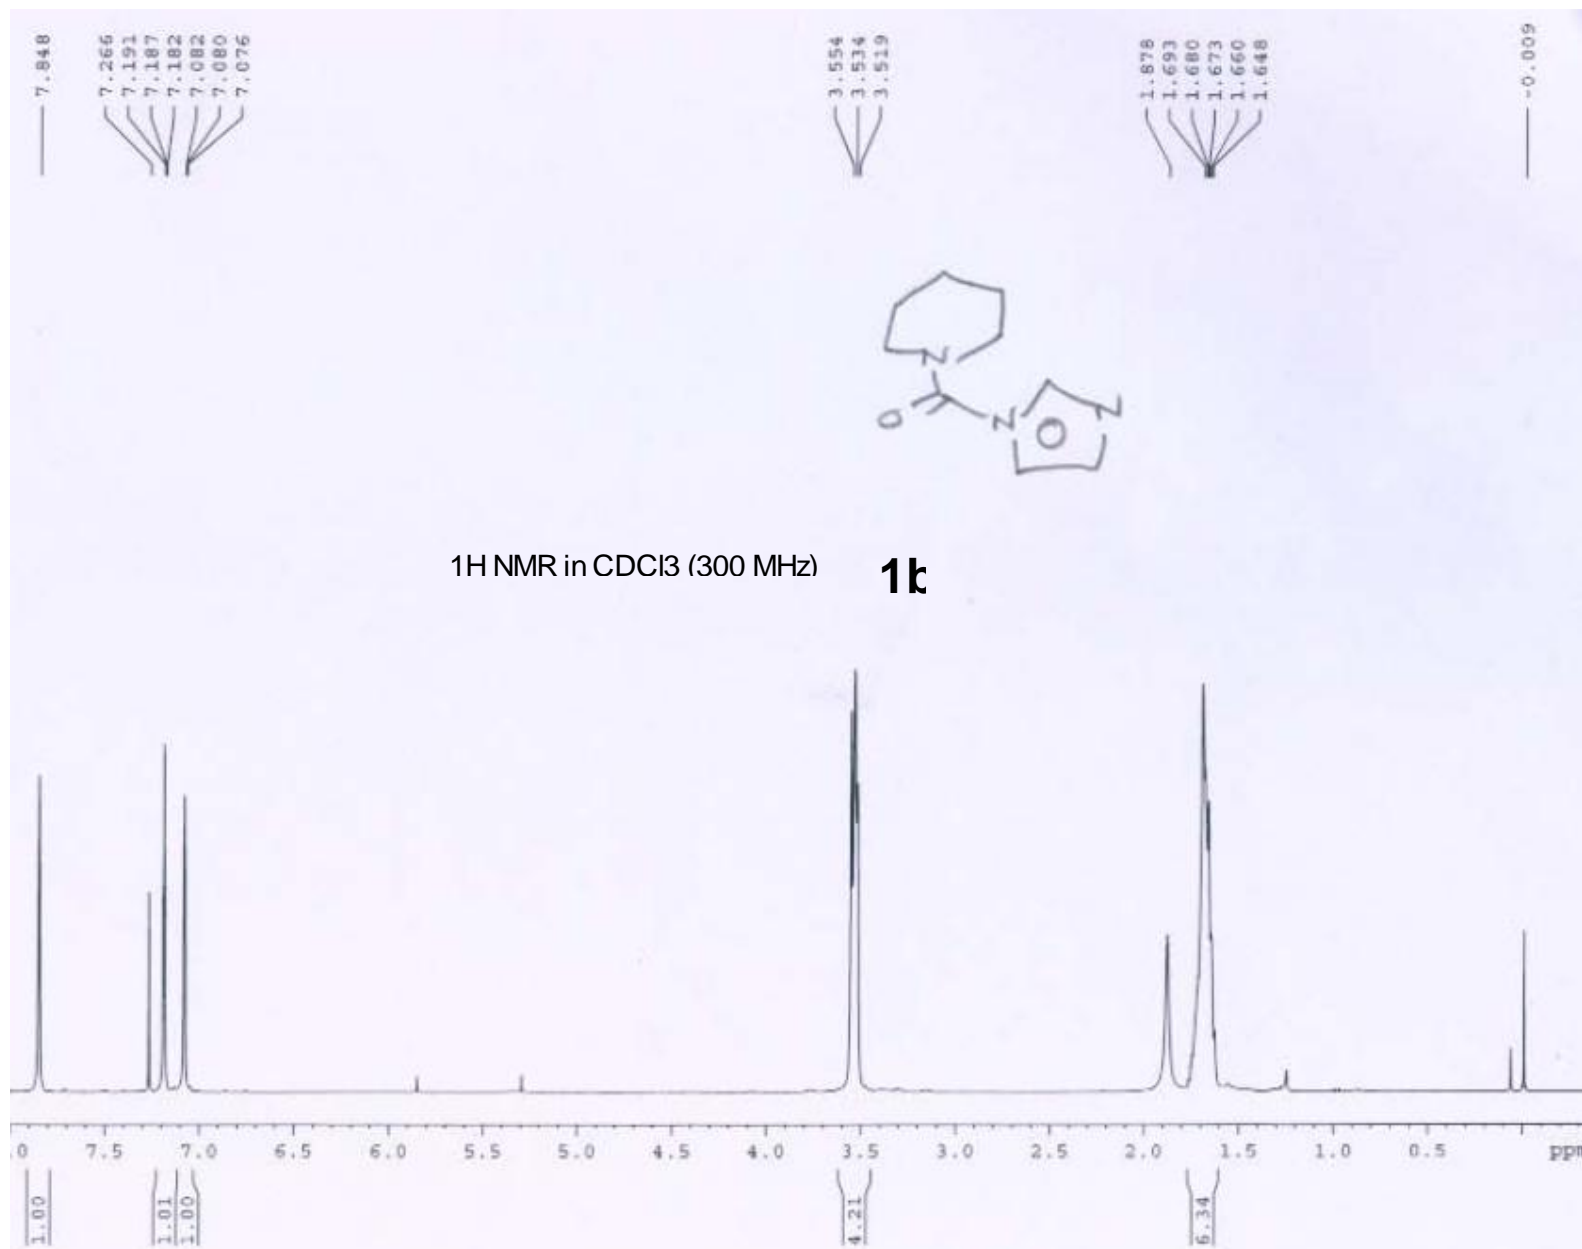

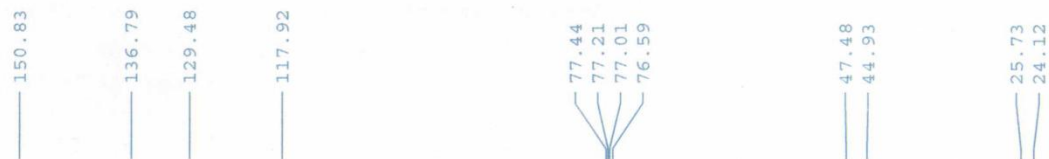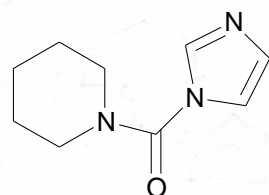

**1b**

$^{13}\text{C}$  NMR in CDCl<sub>3</sub> (75 MHz)

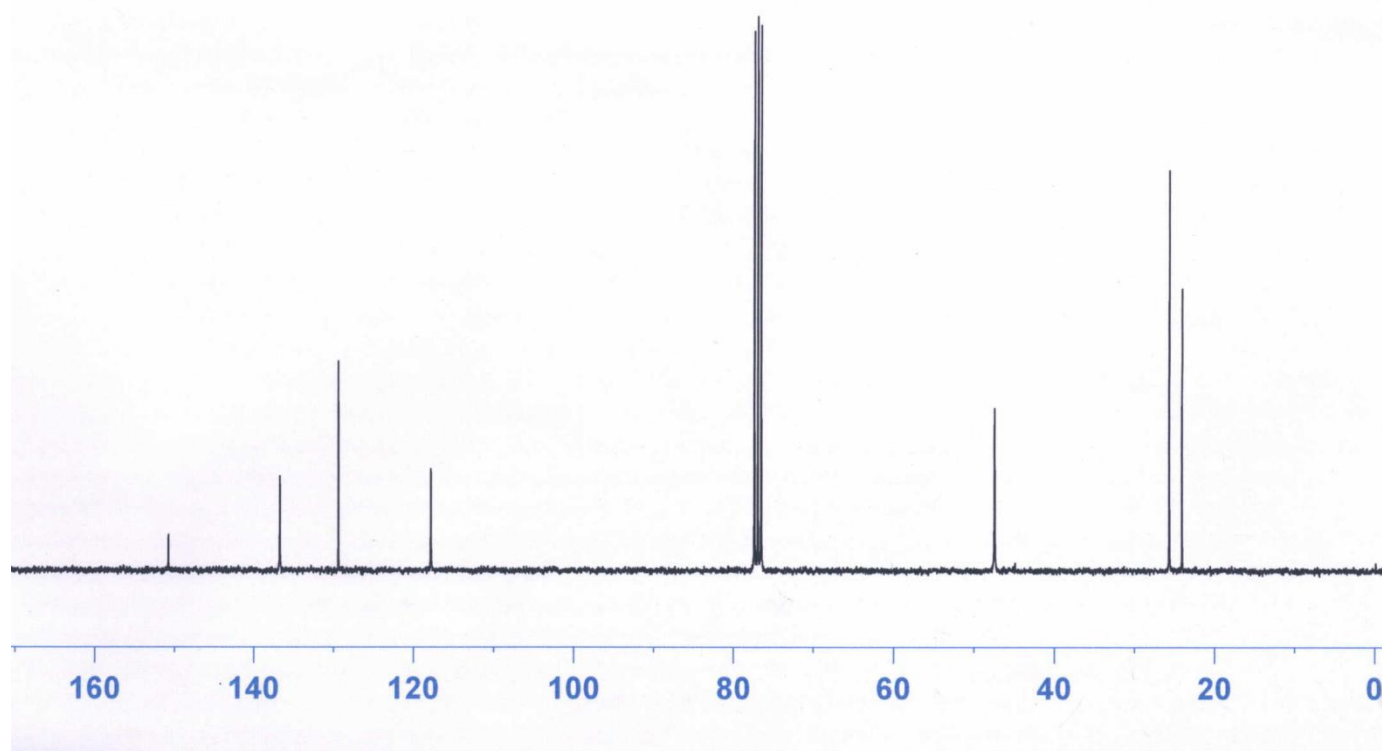

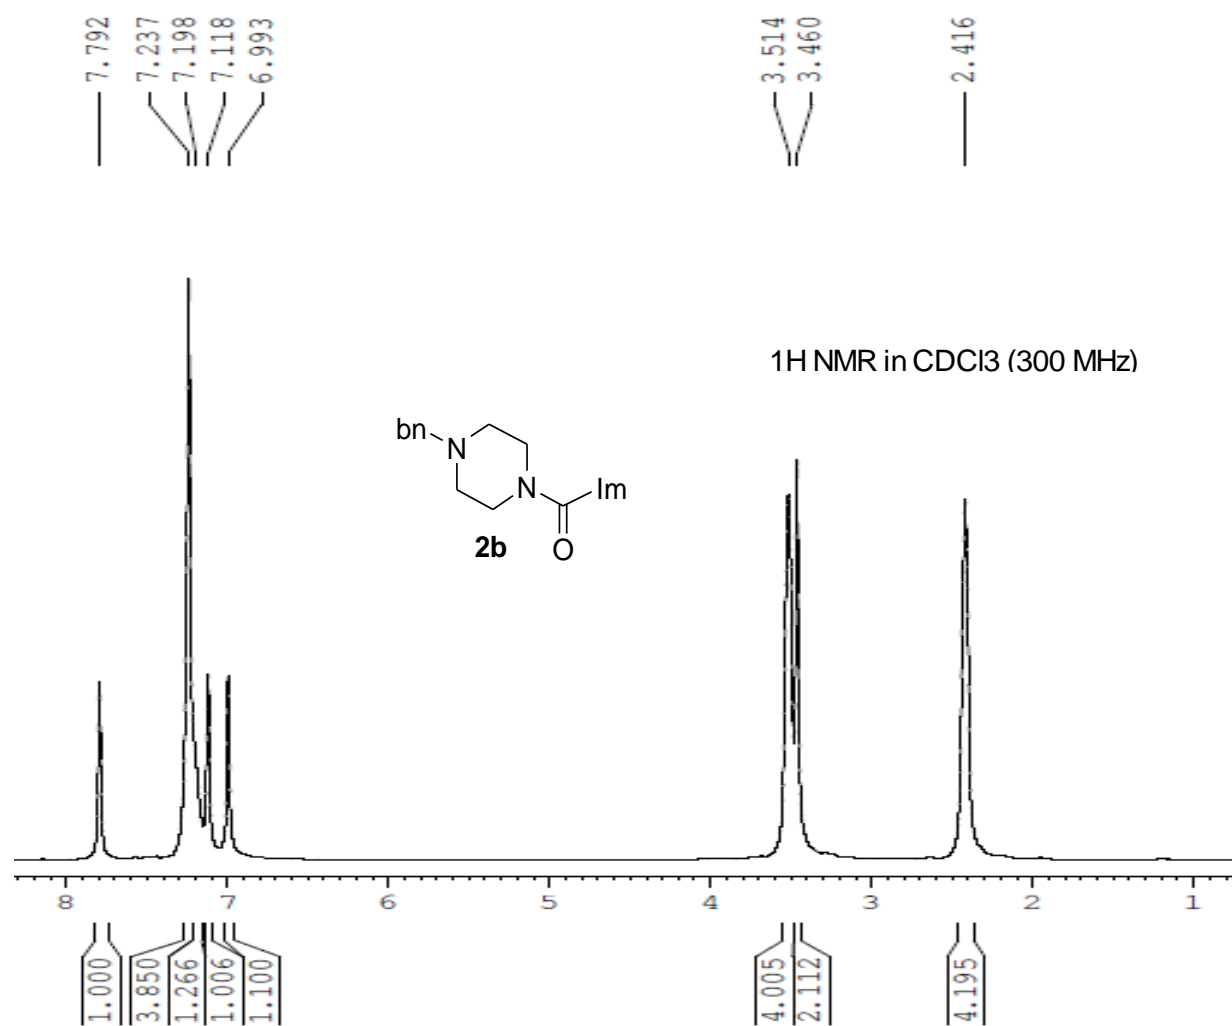

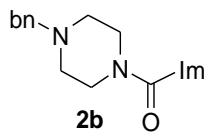

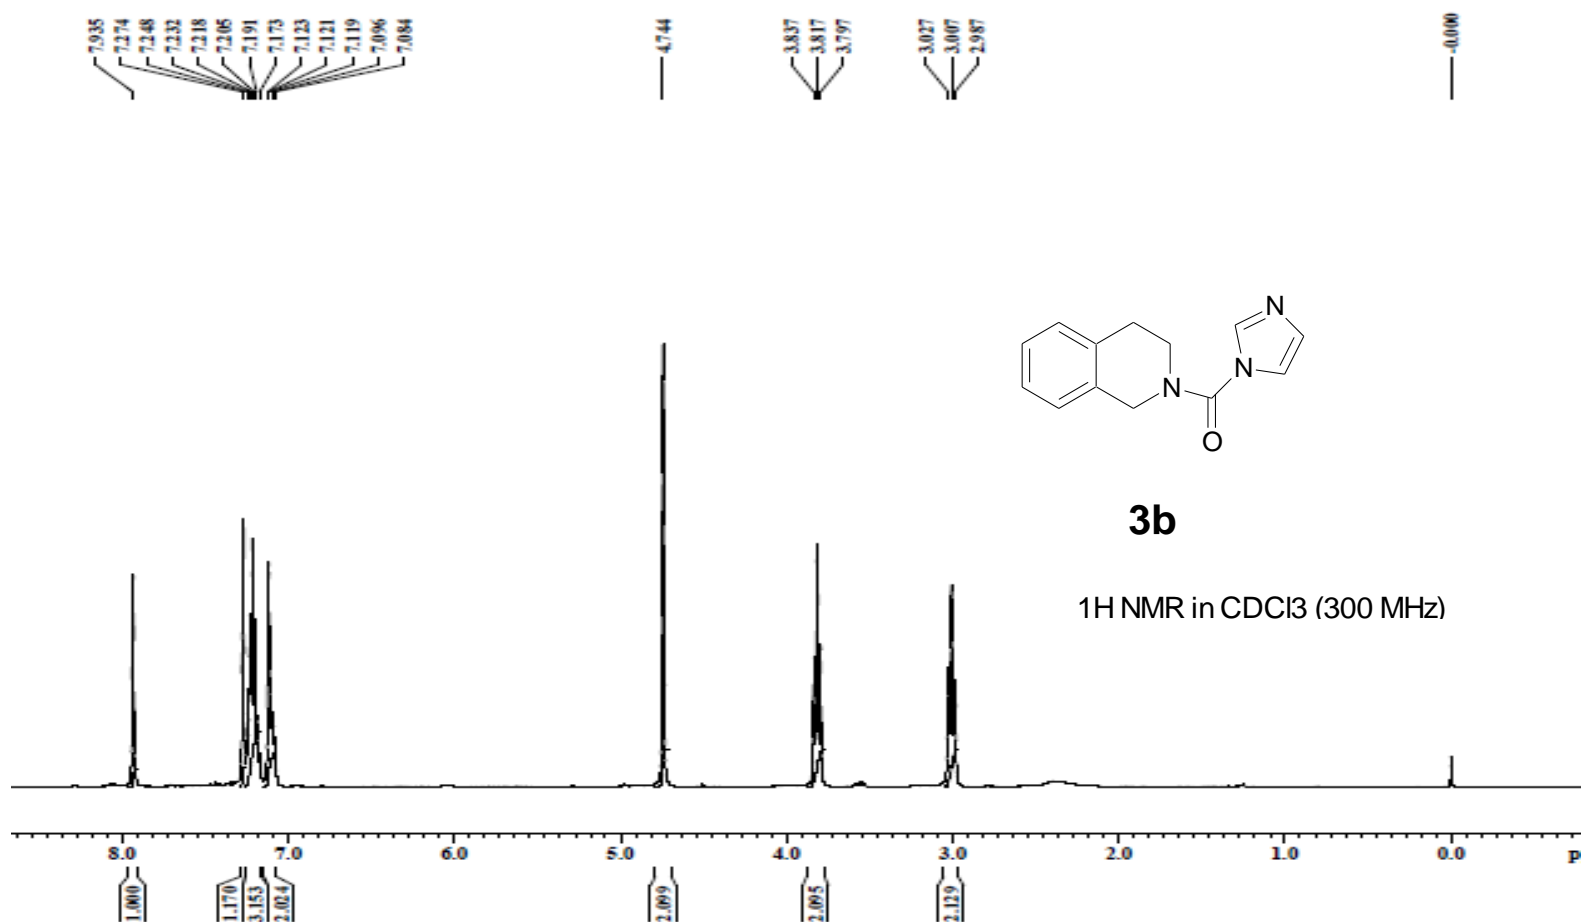

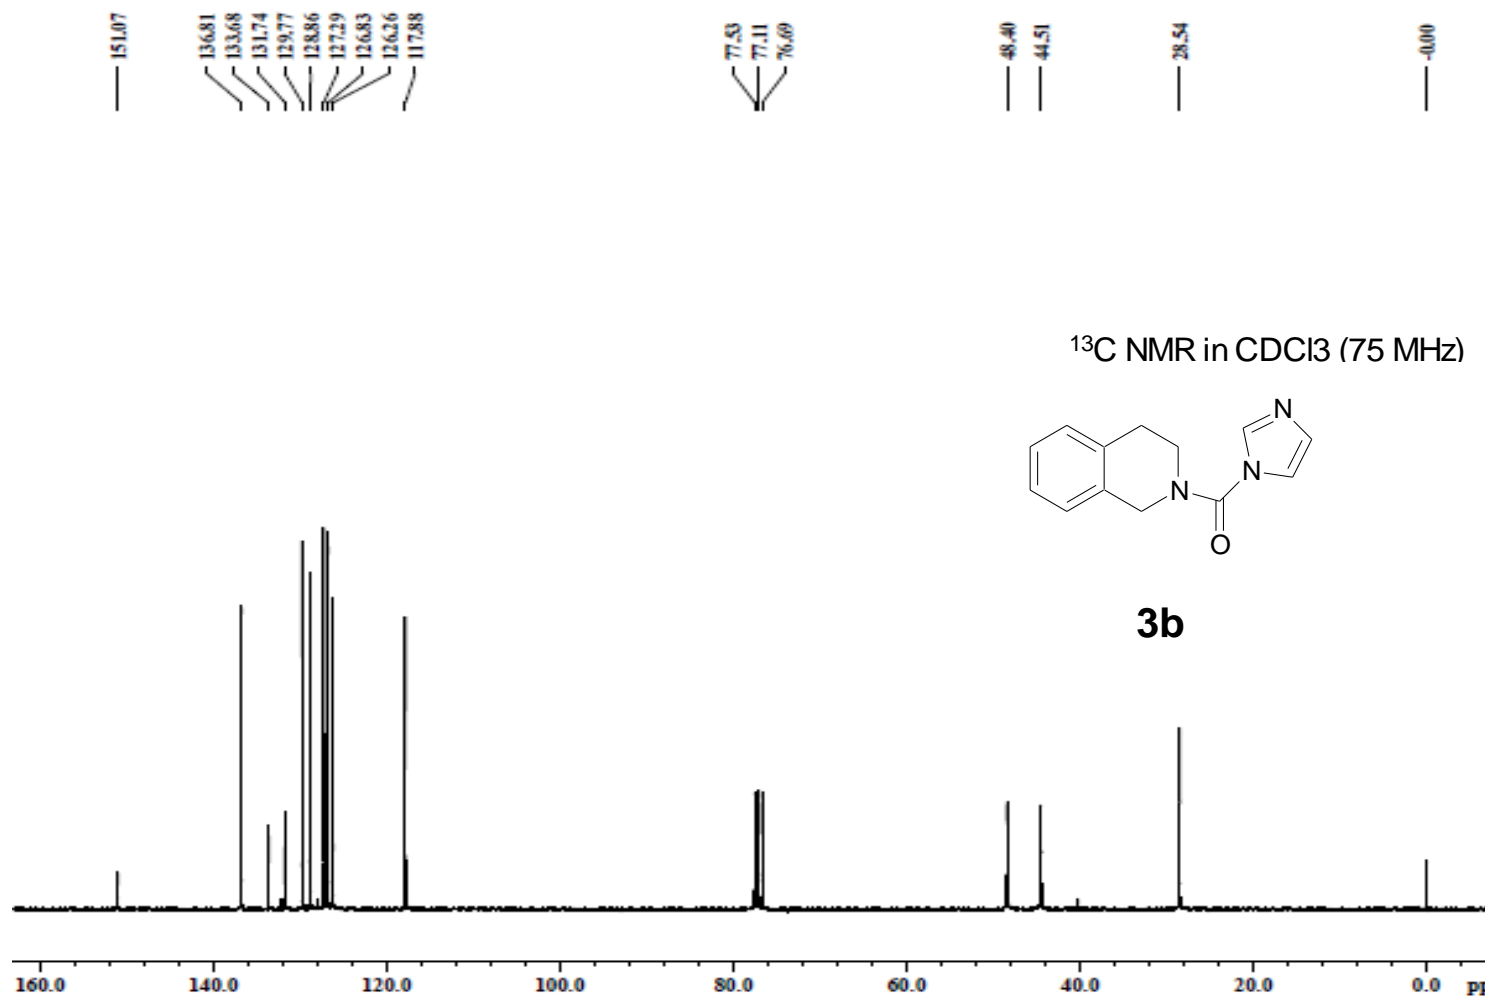



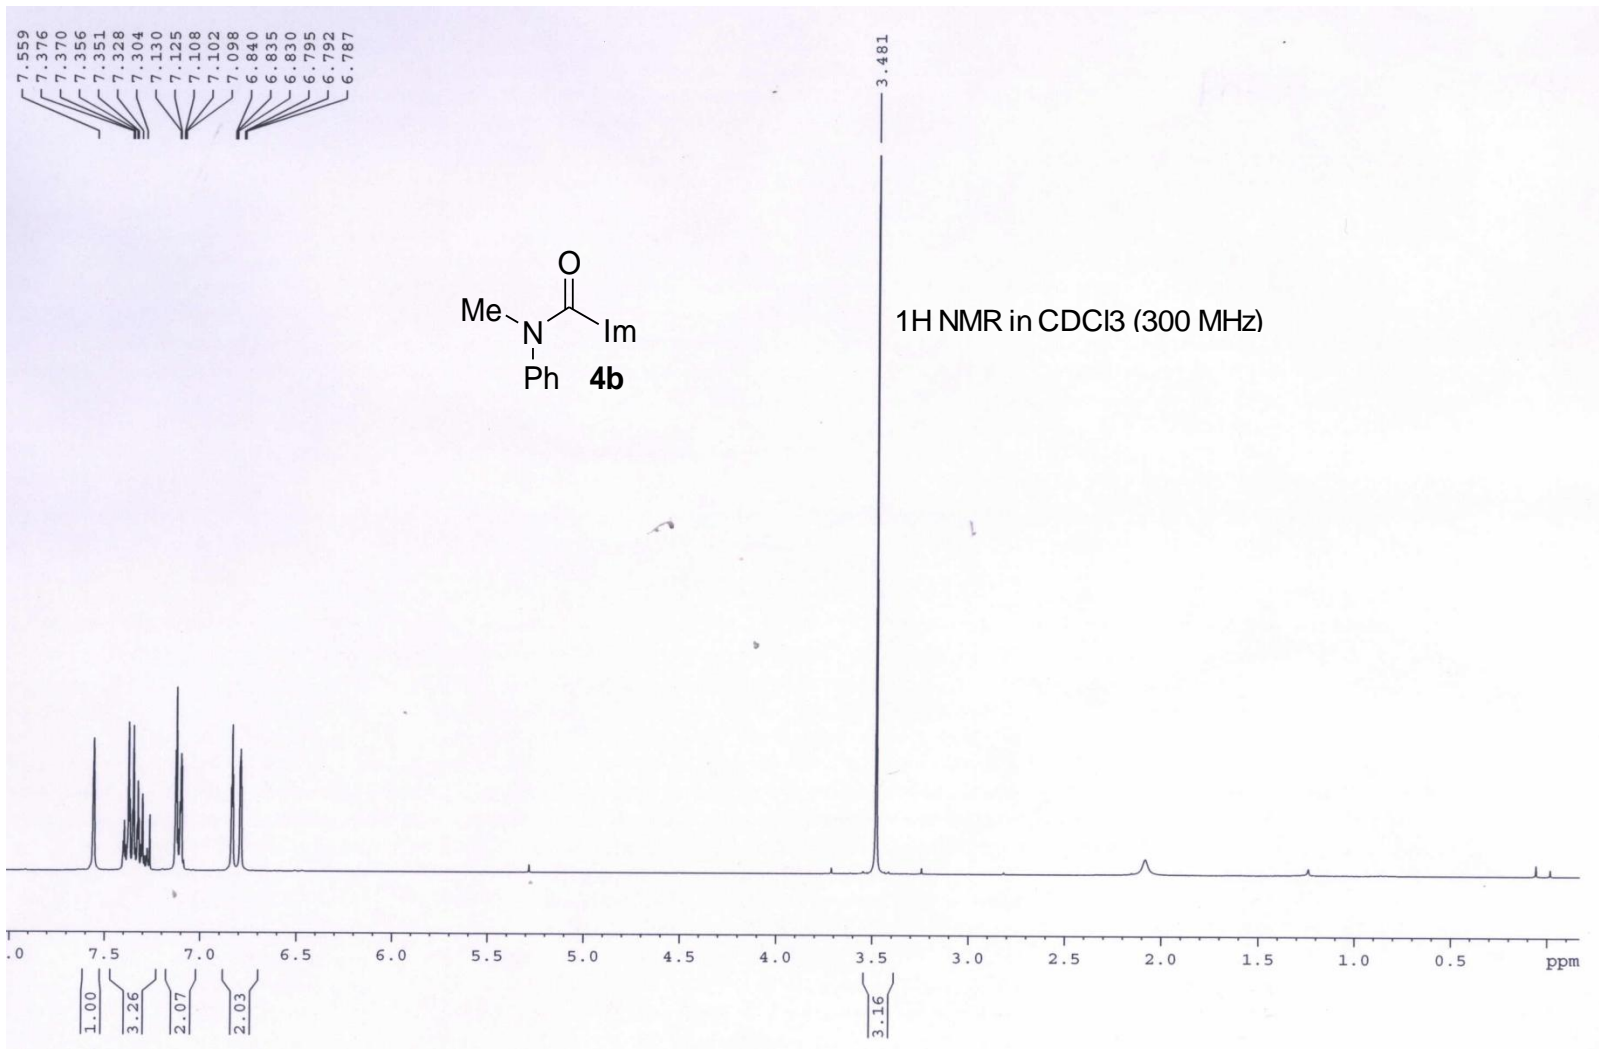

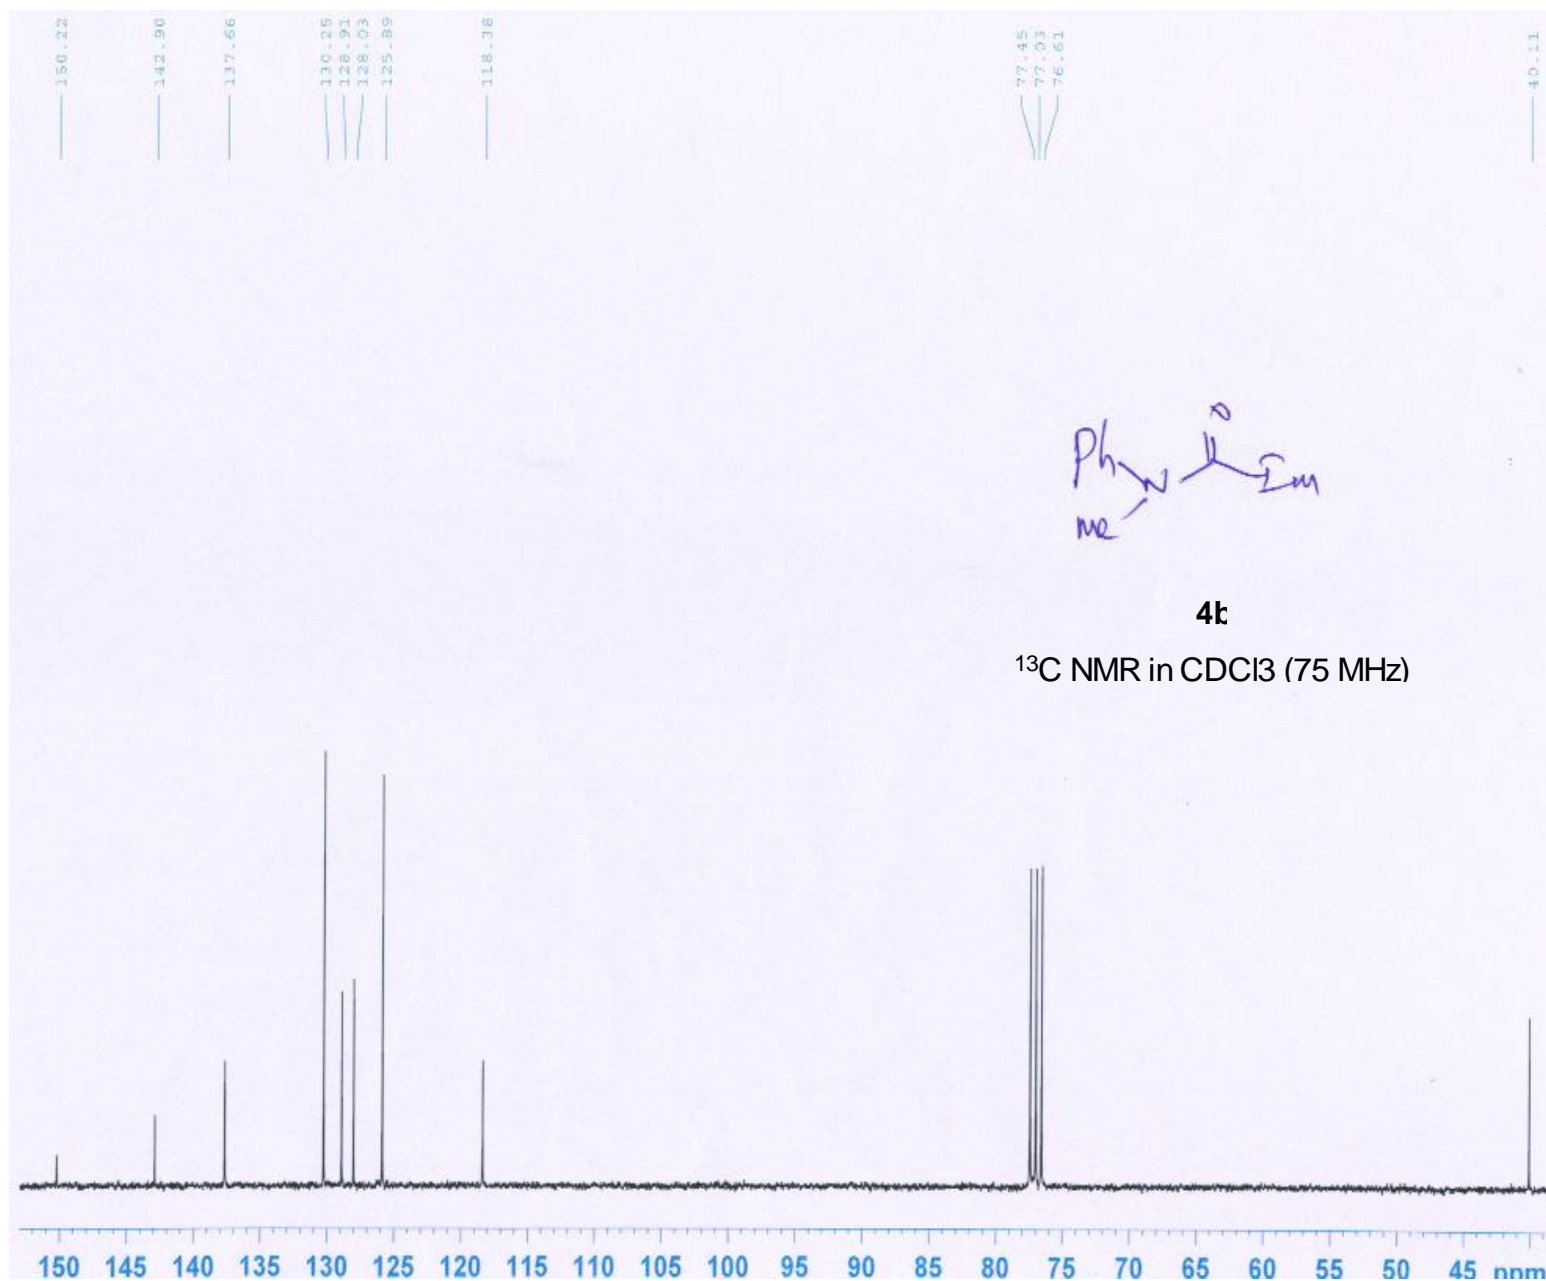

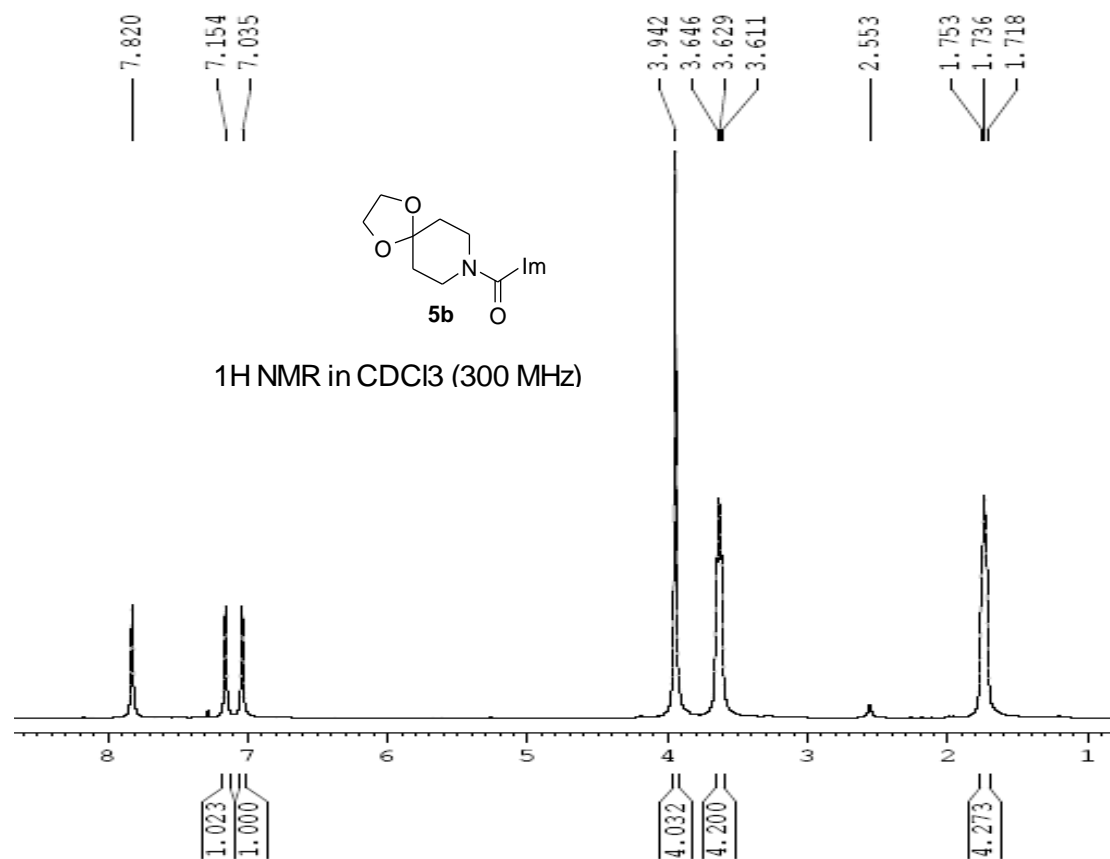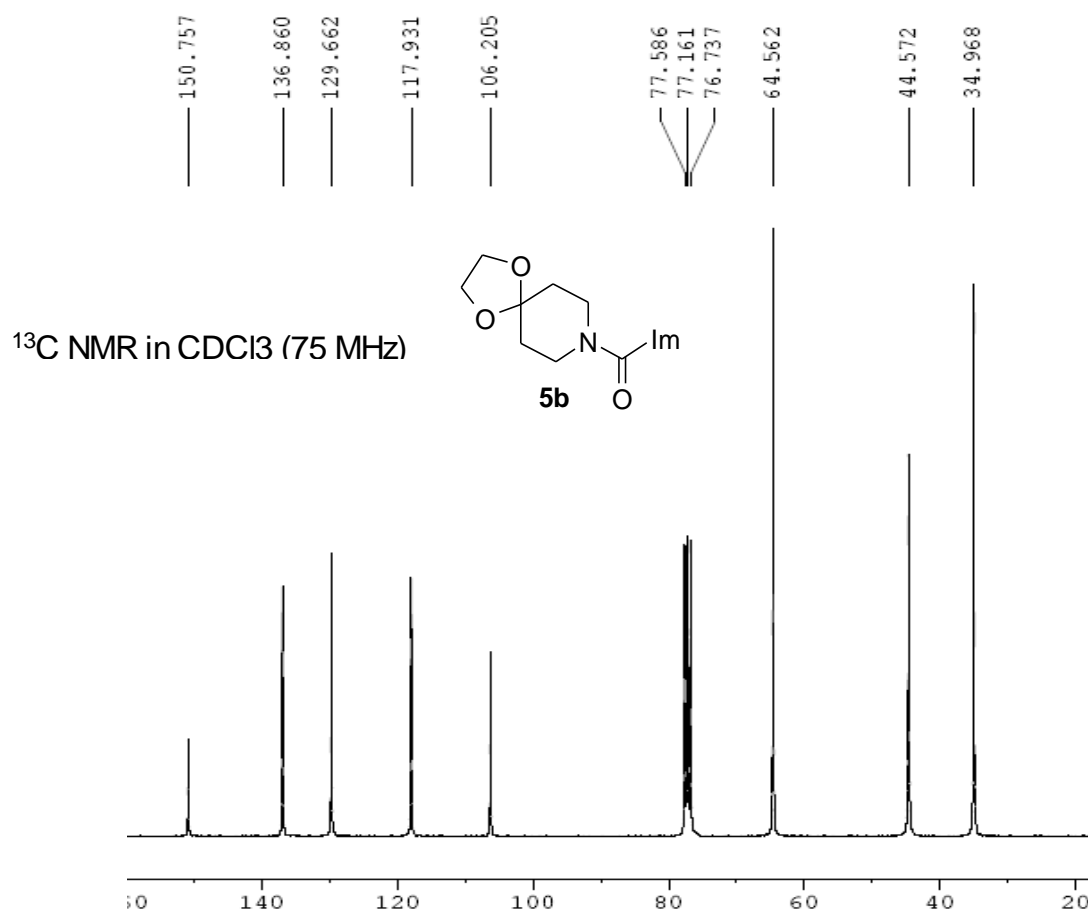

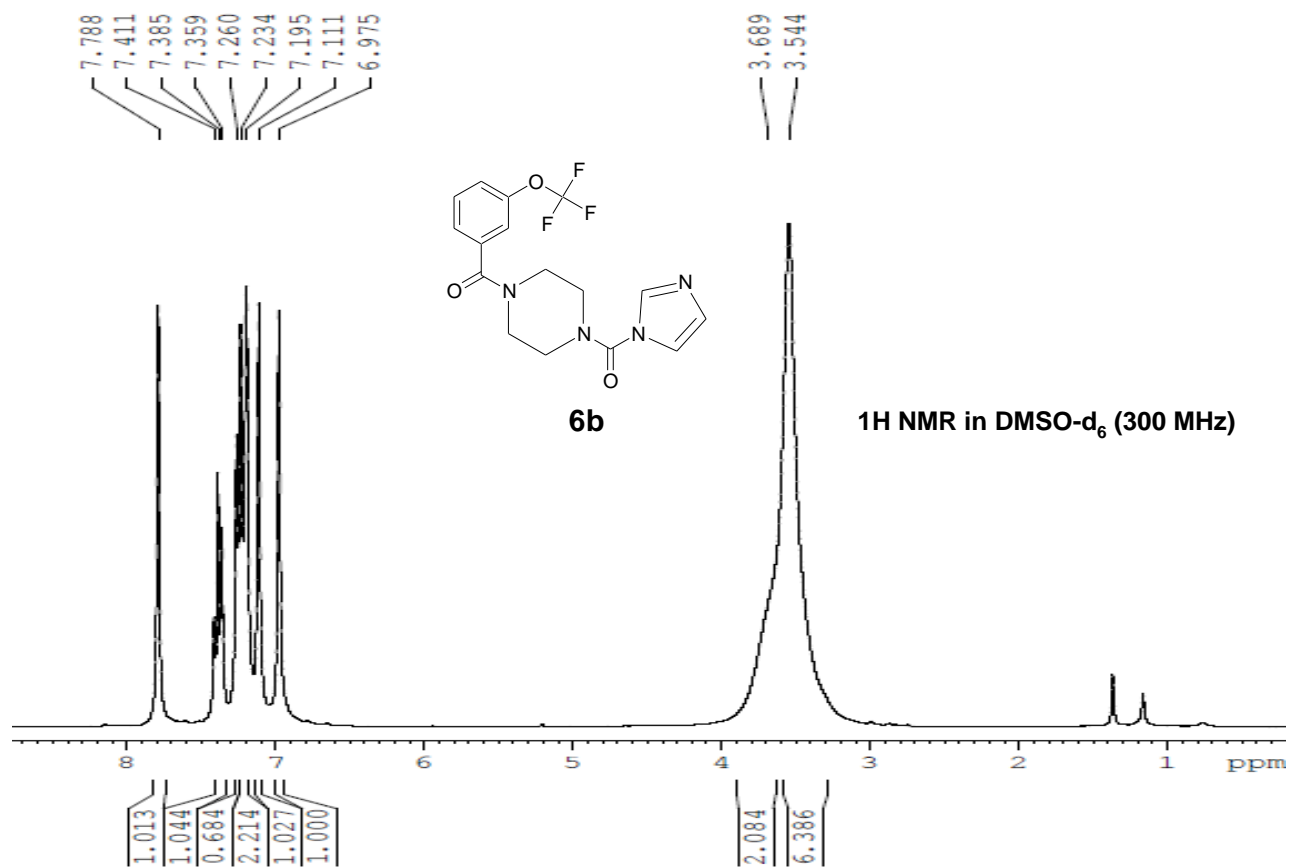

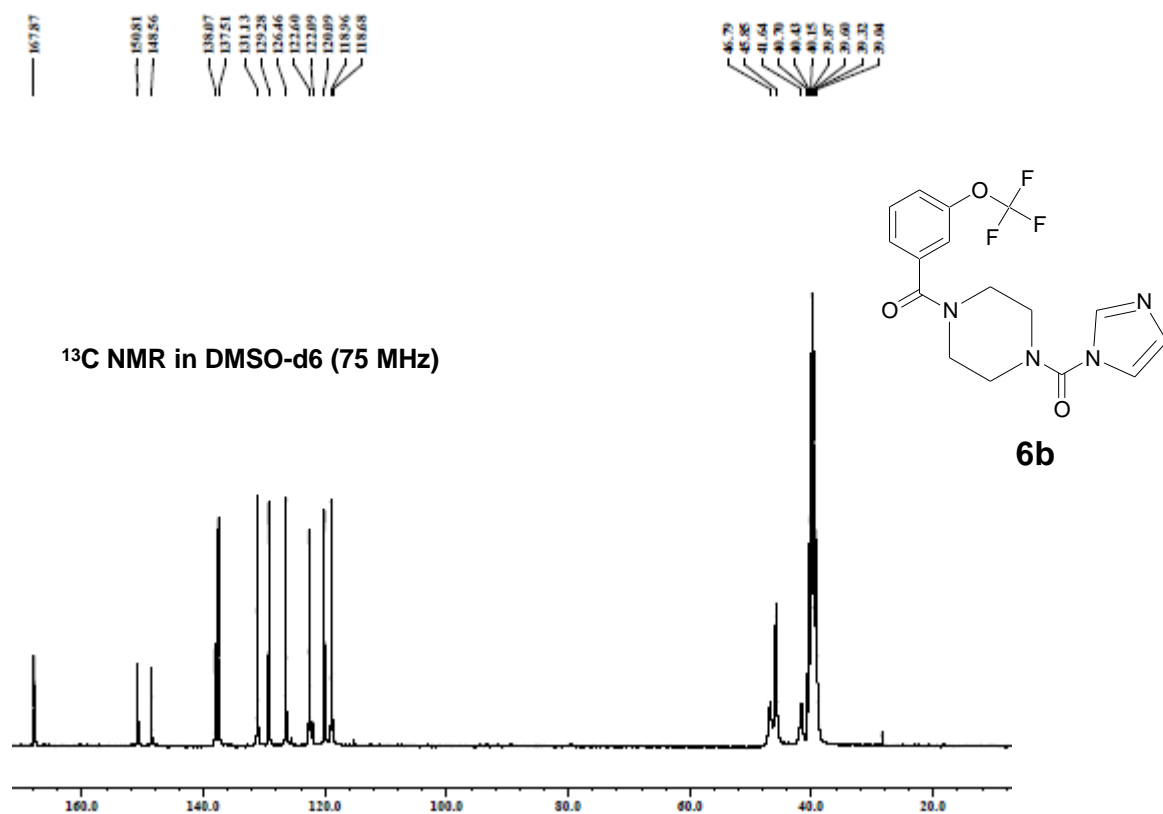

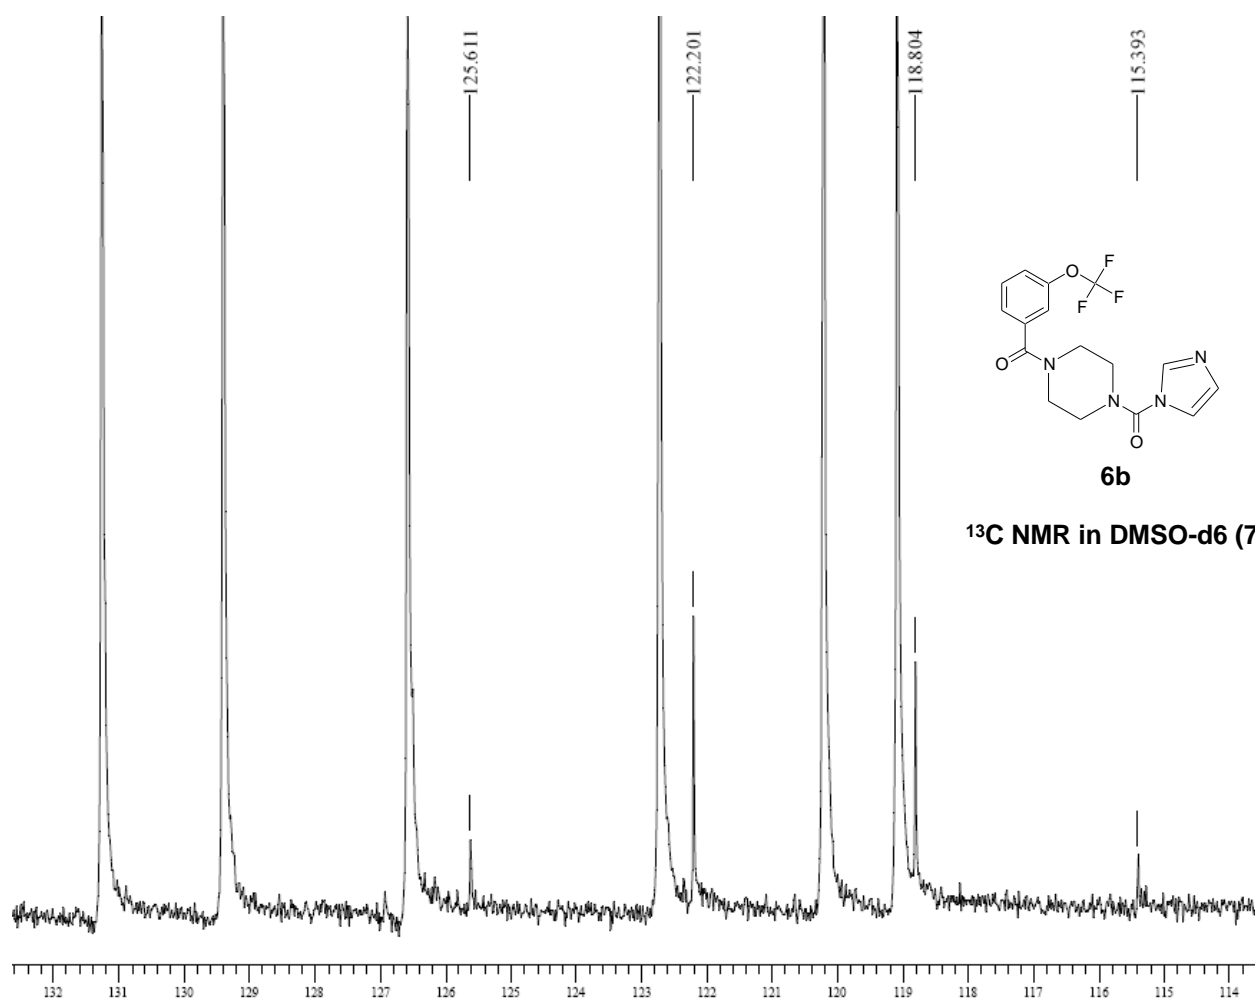

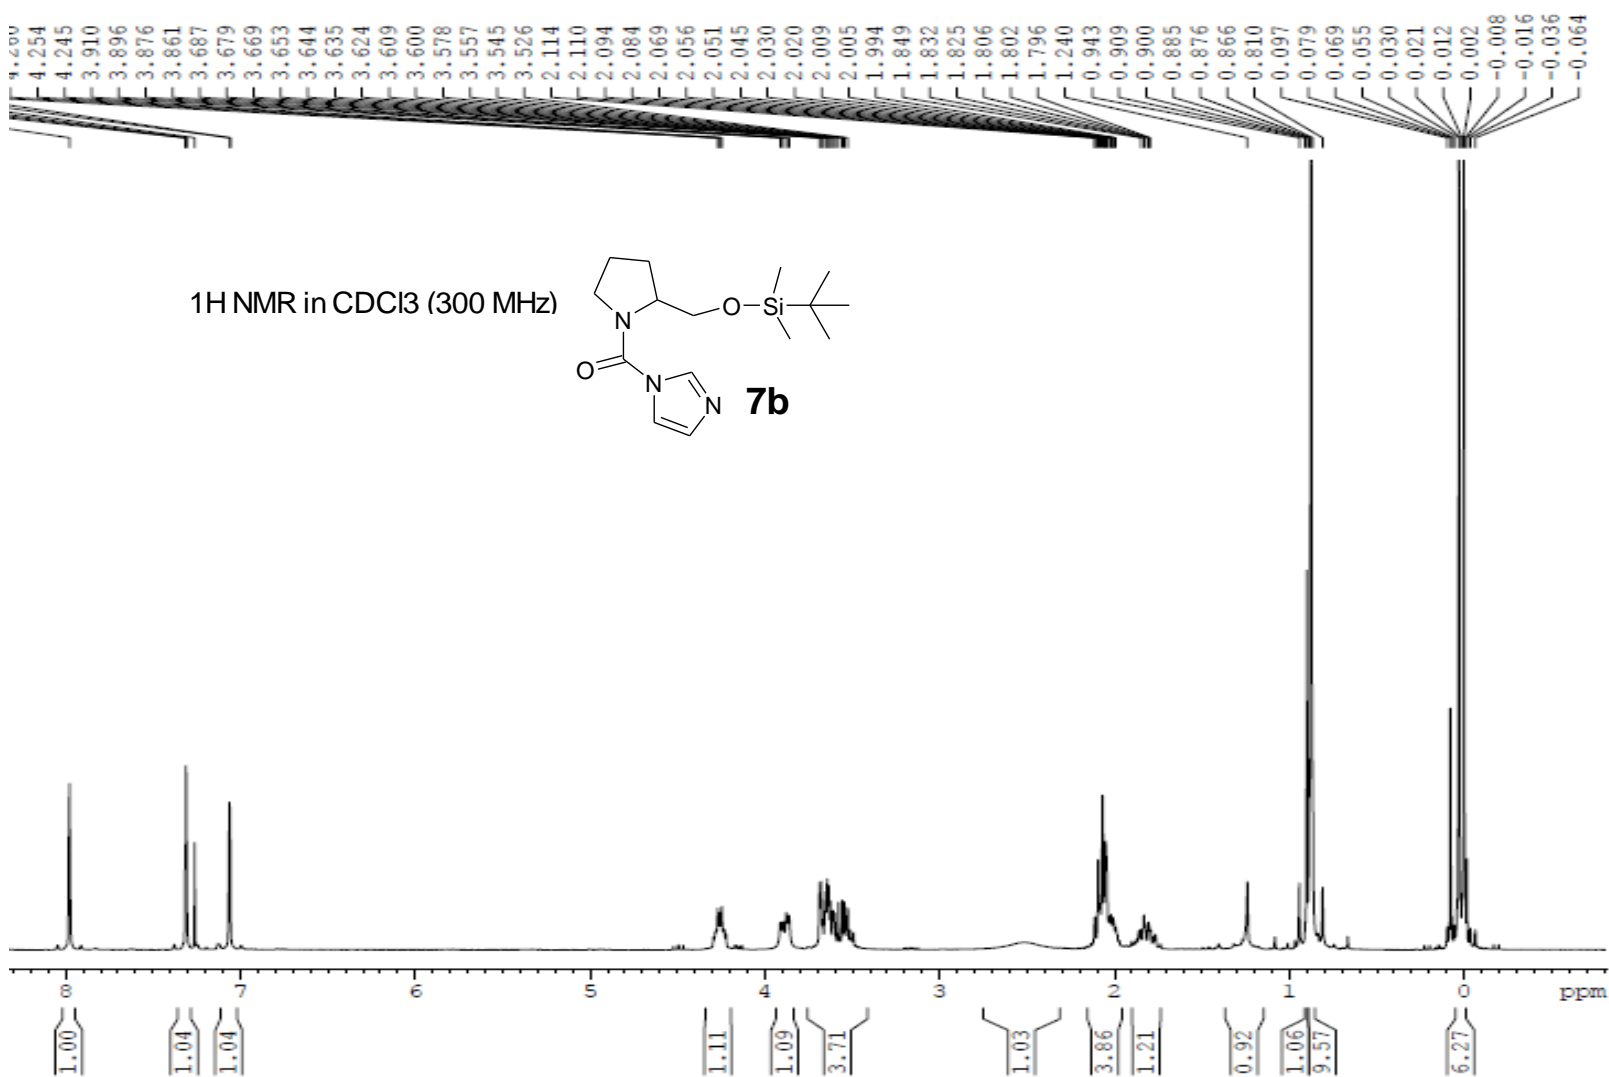

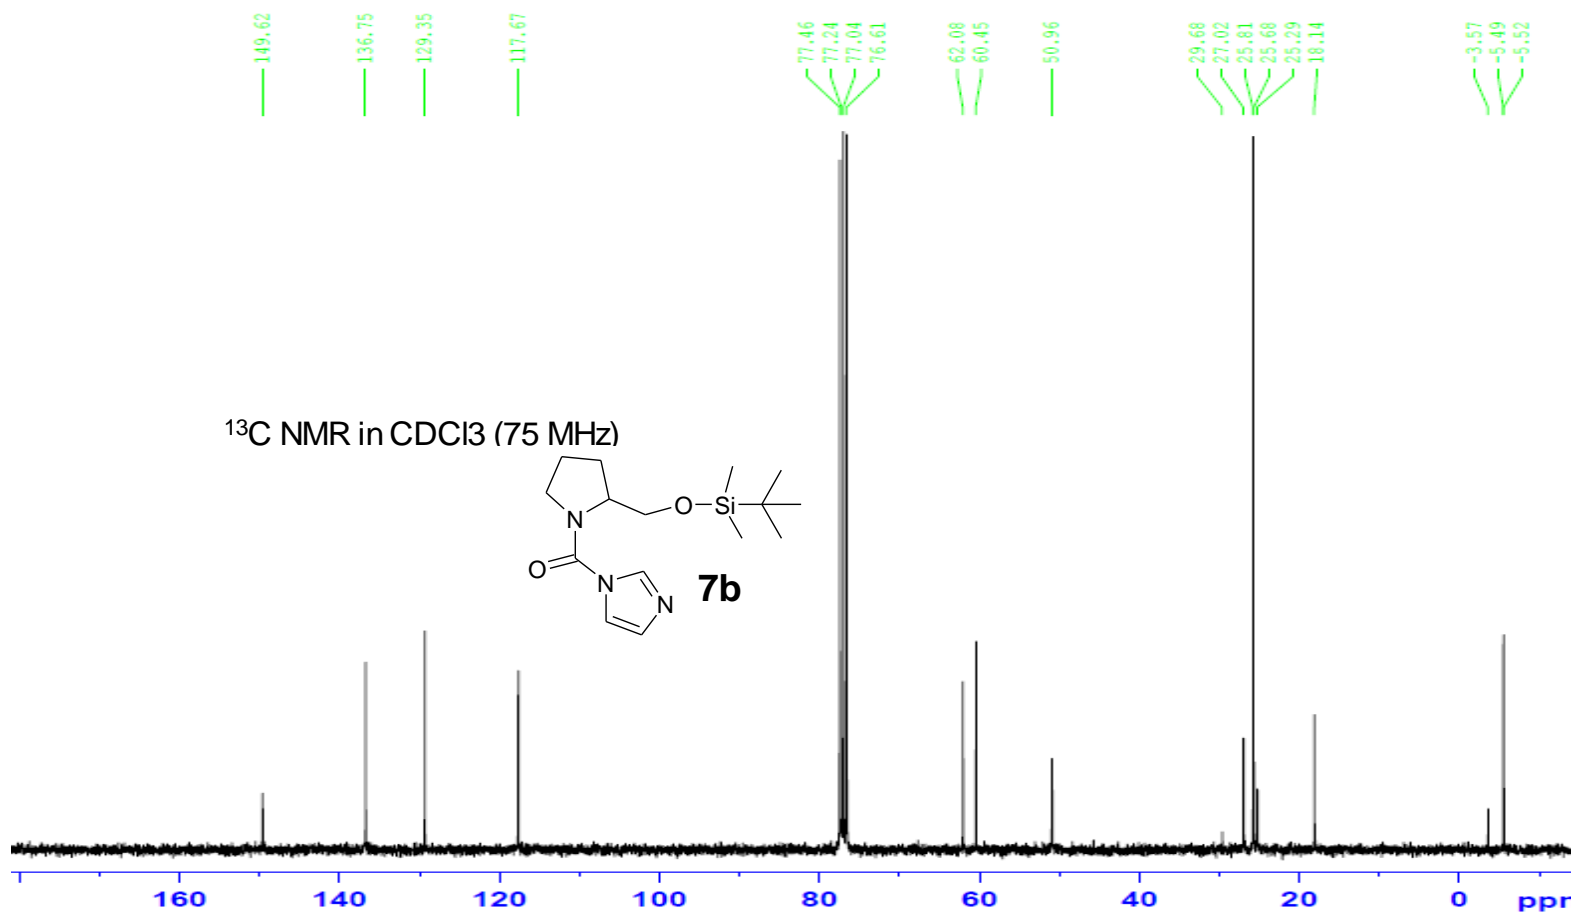



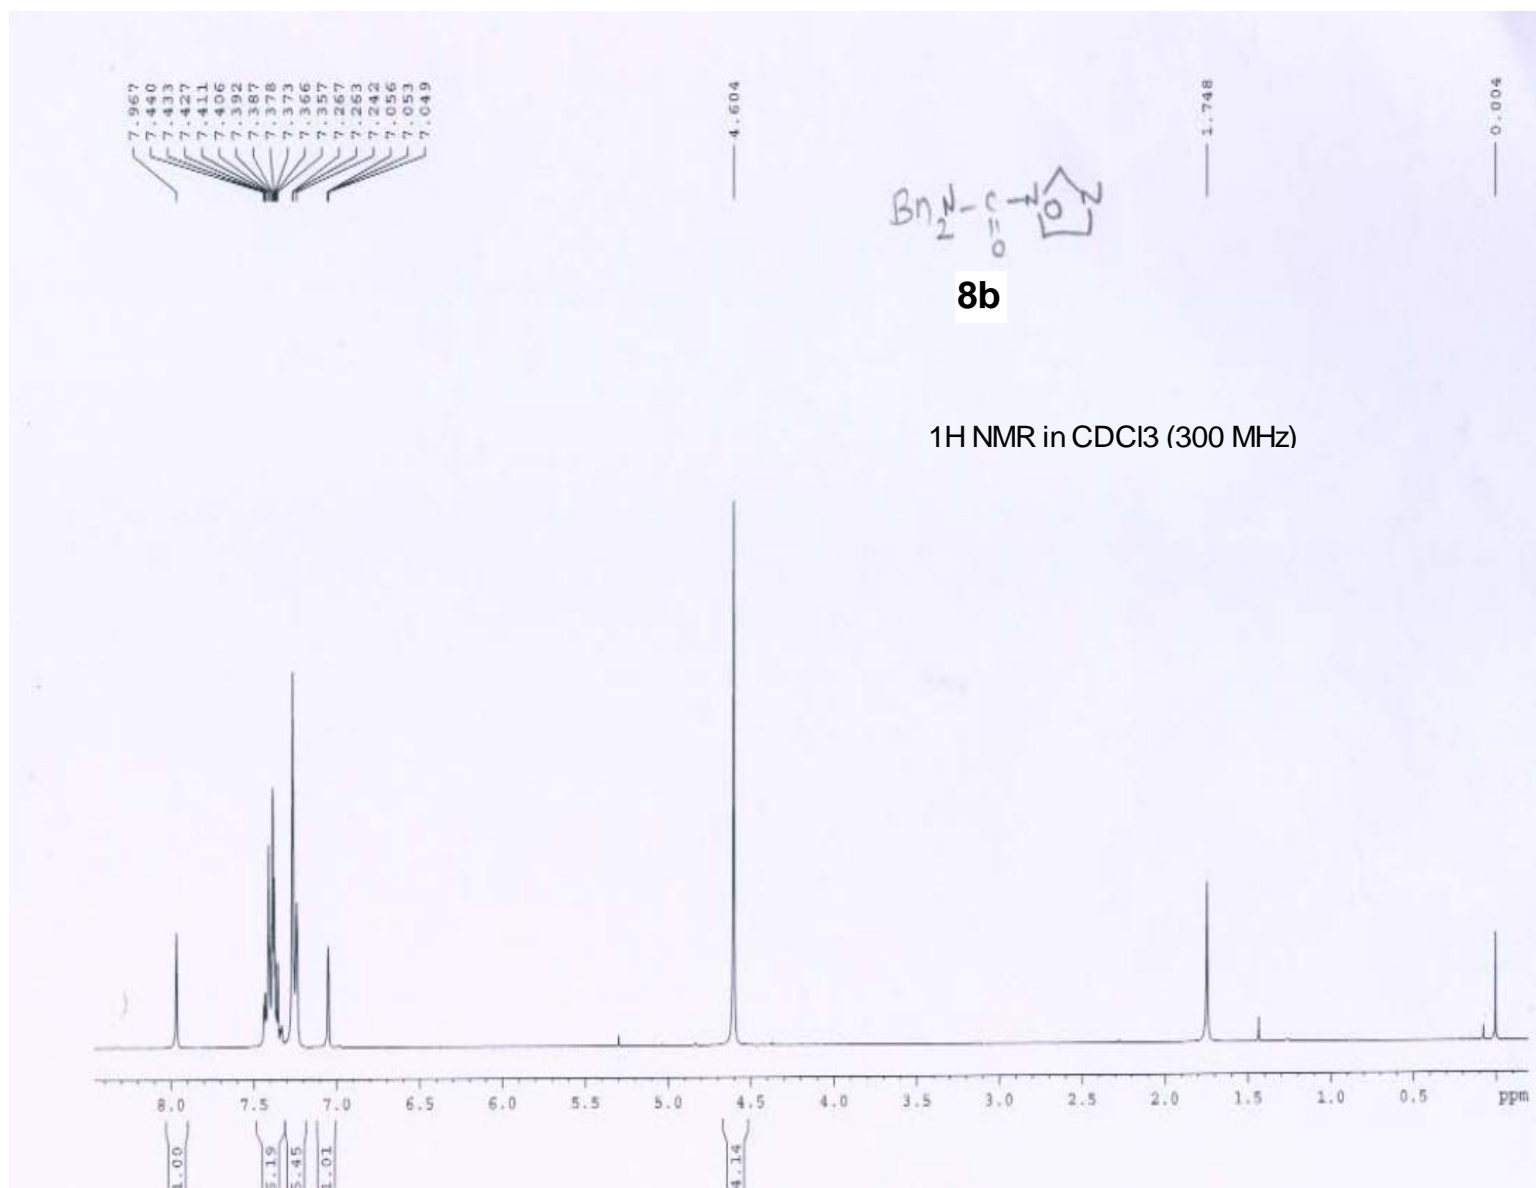

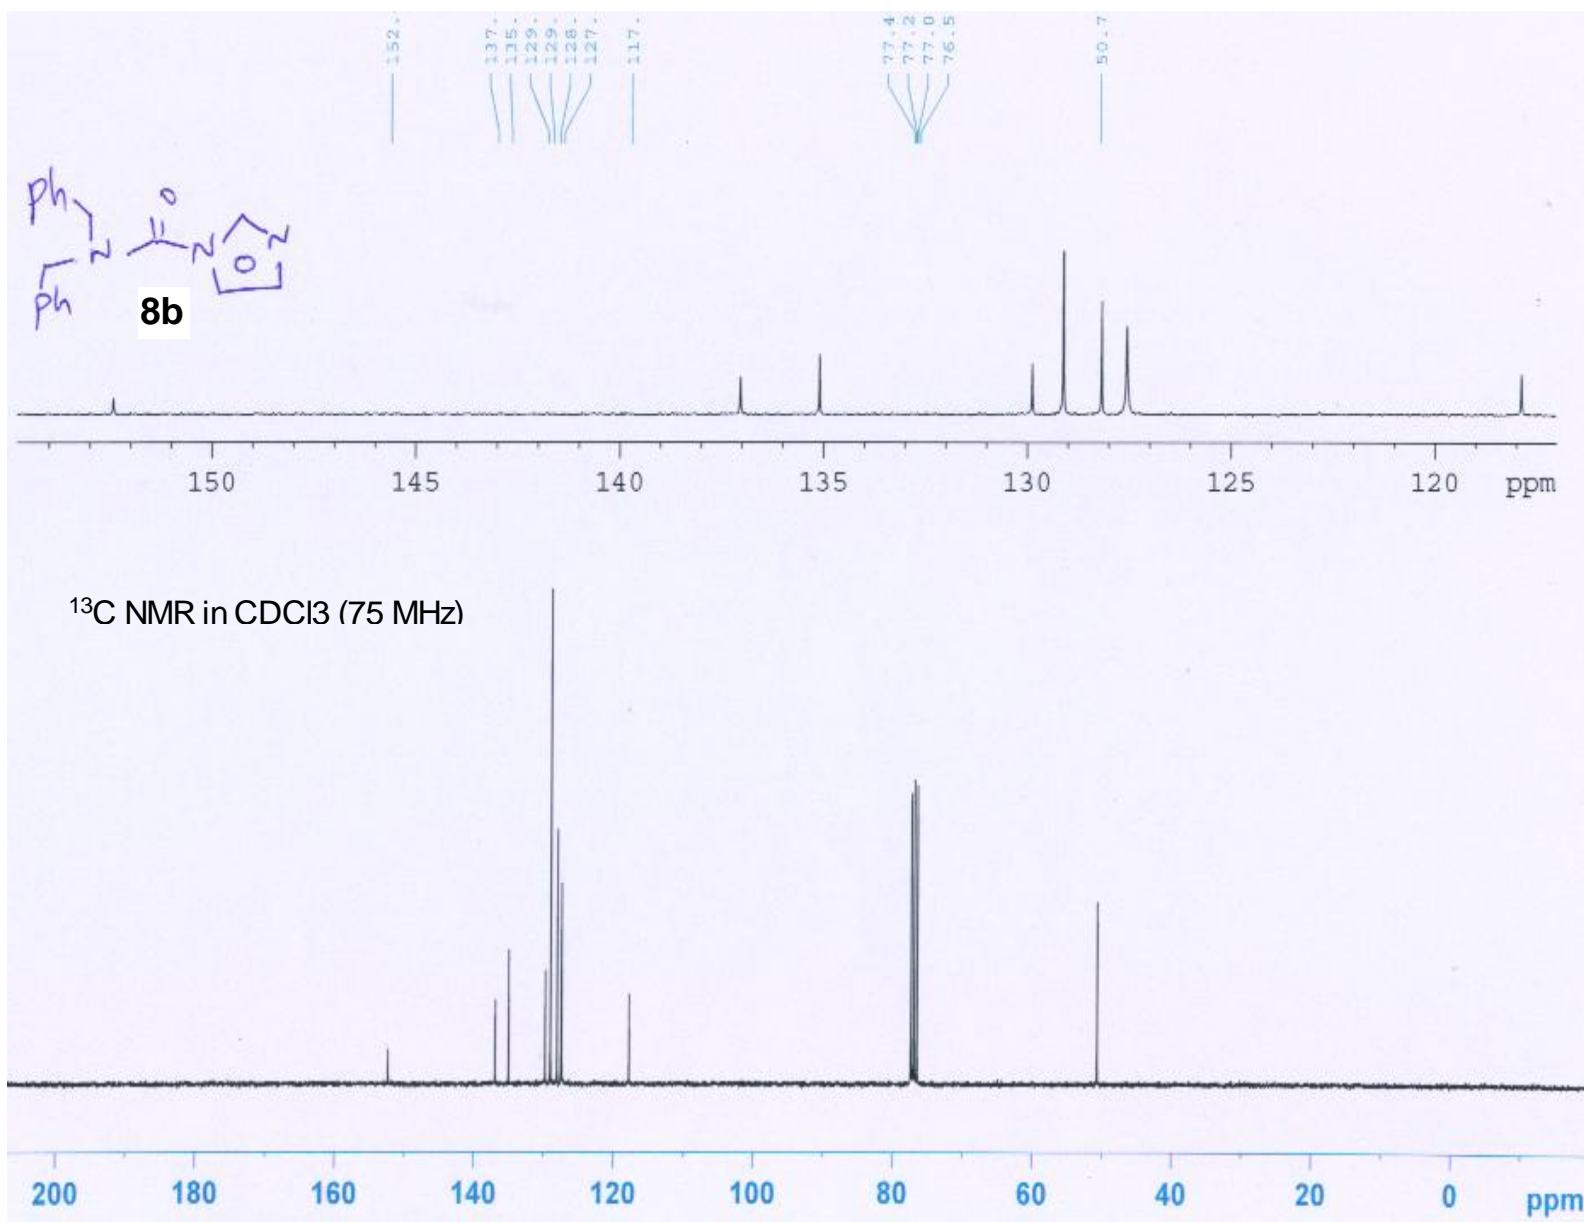

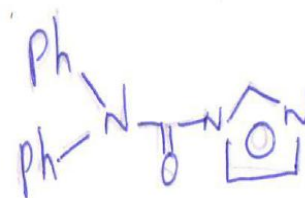

<sup>1</sup>H NMR in CDCl<sub>3</sub> (300 MHz)

**9b**

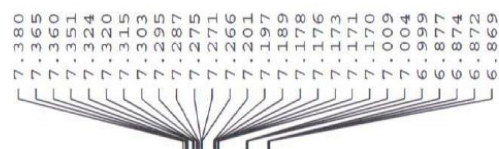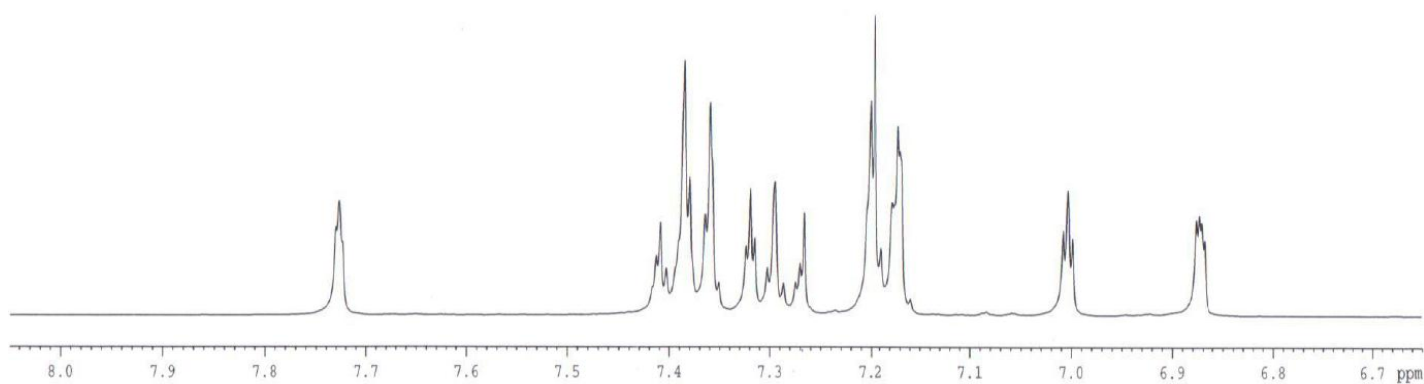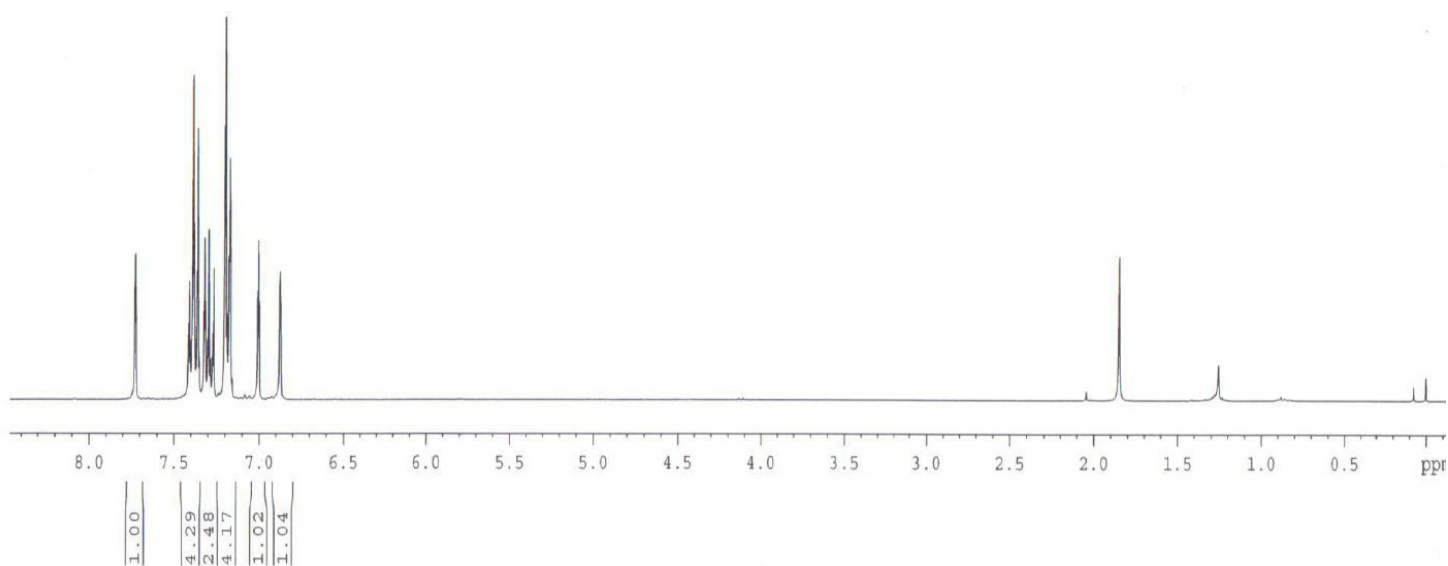

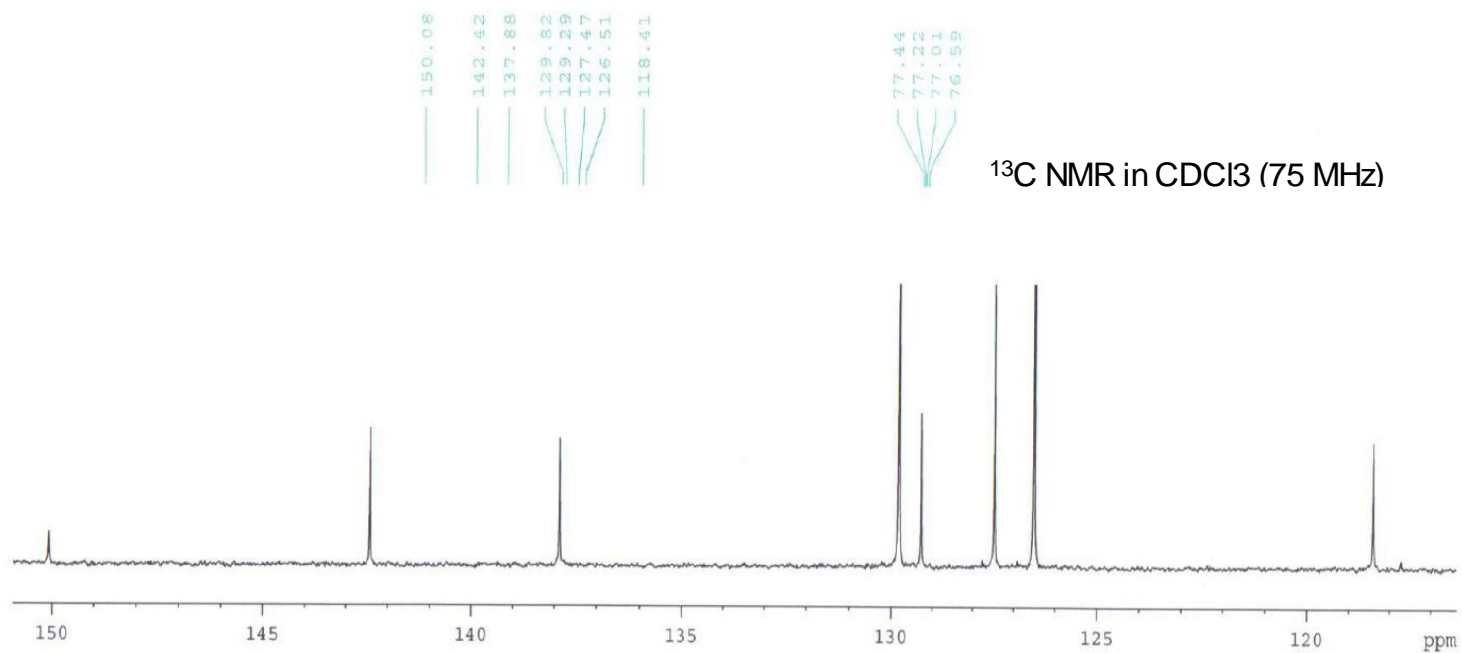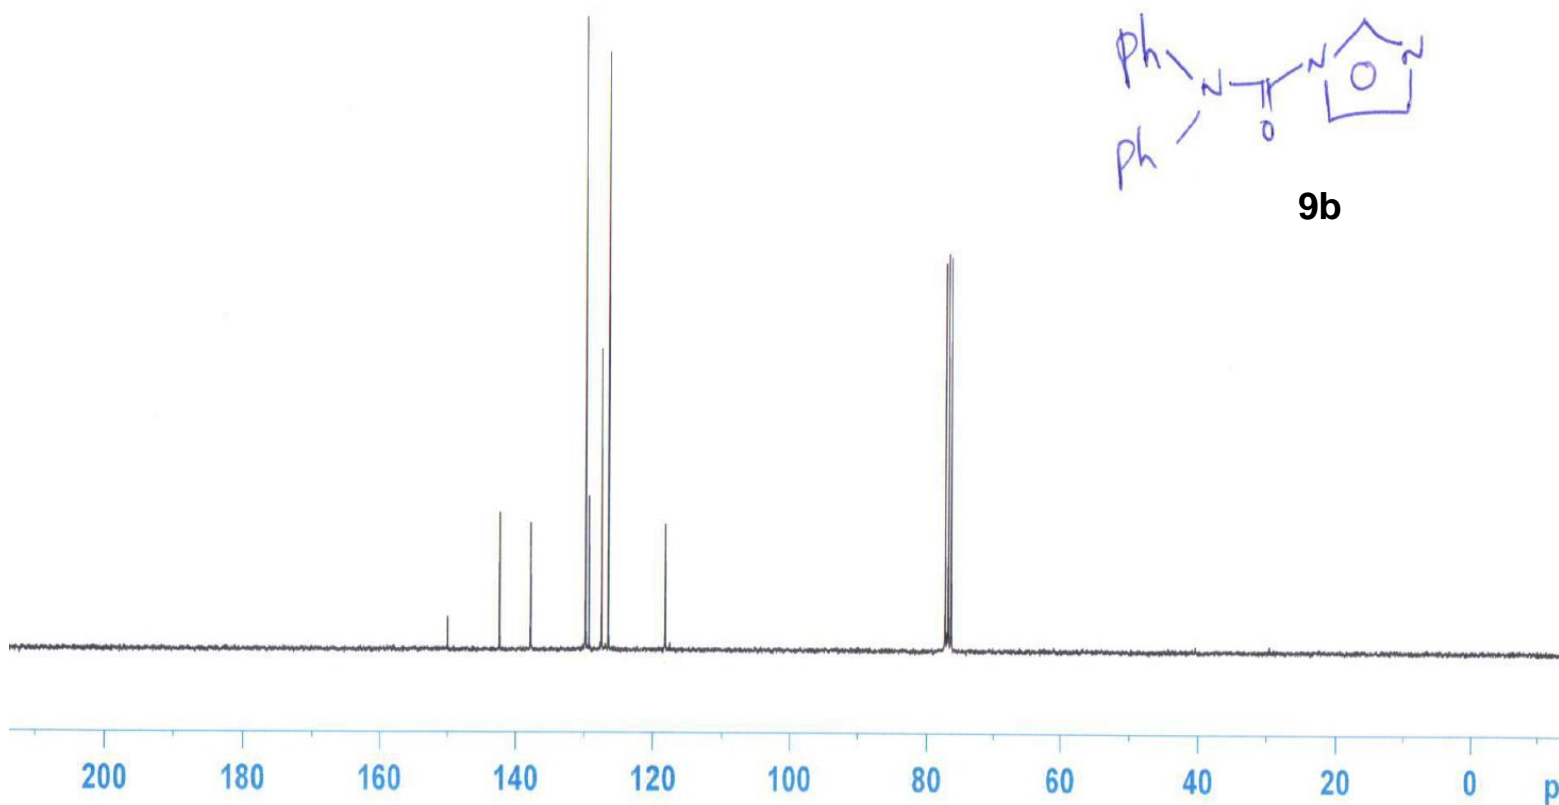

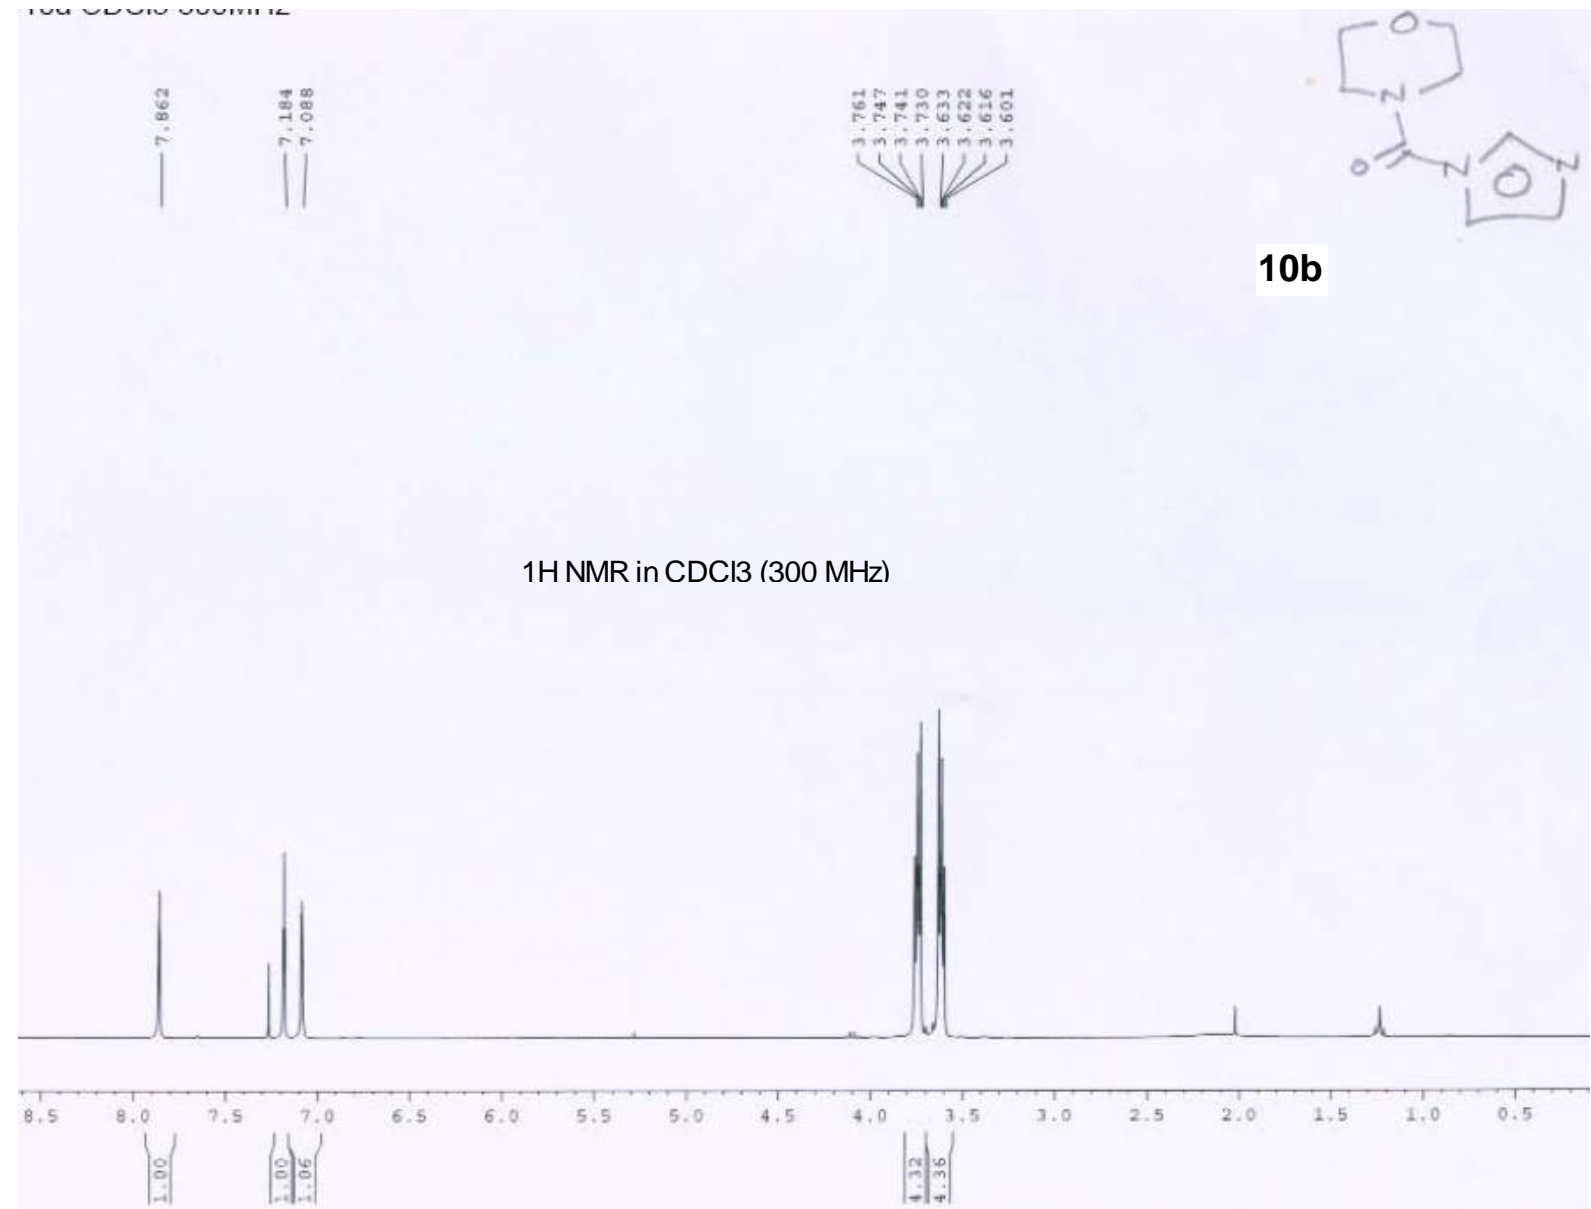

10b

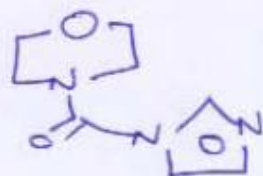

<sup>13</sup>C NMR in CDCl<sub>3</sub> (75 MHz)

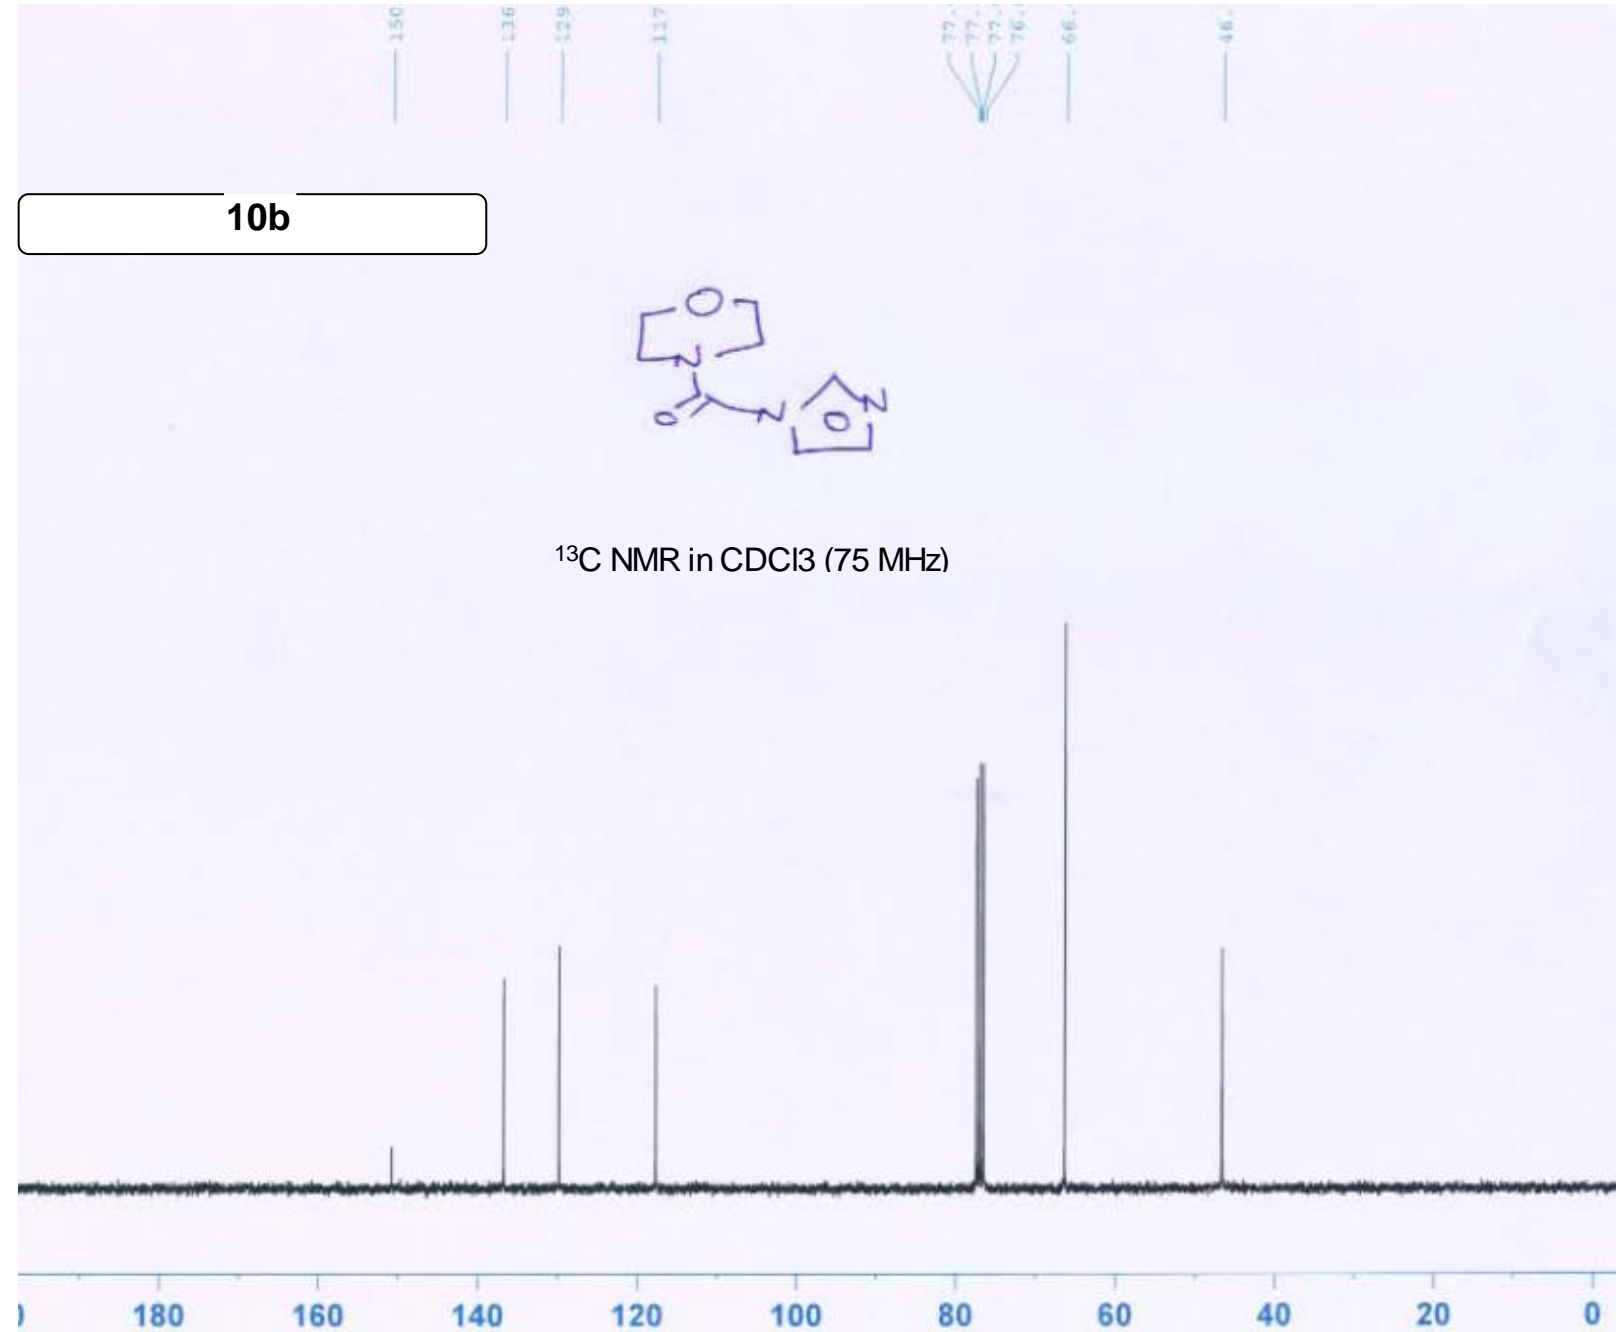

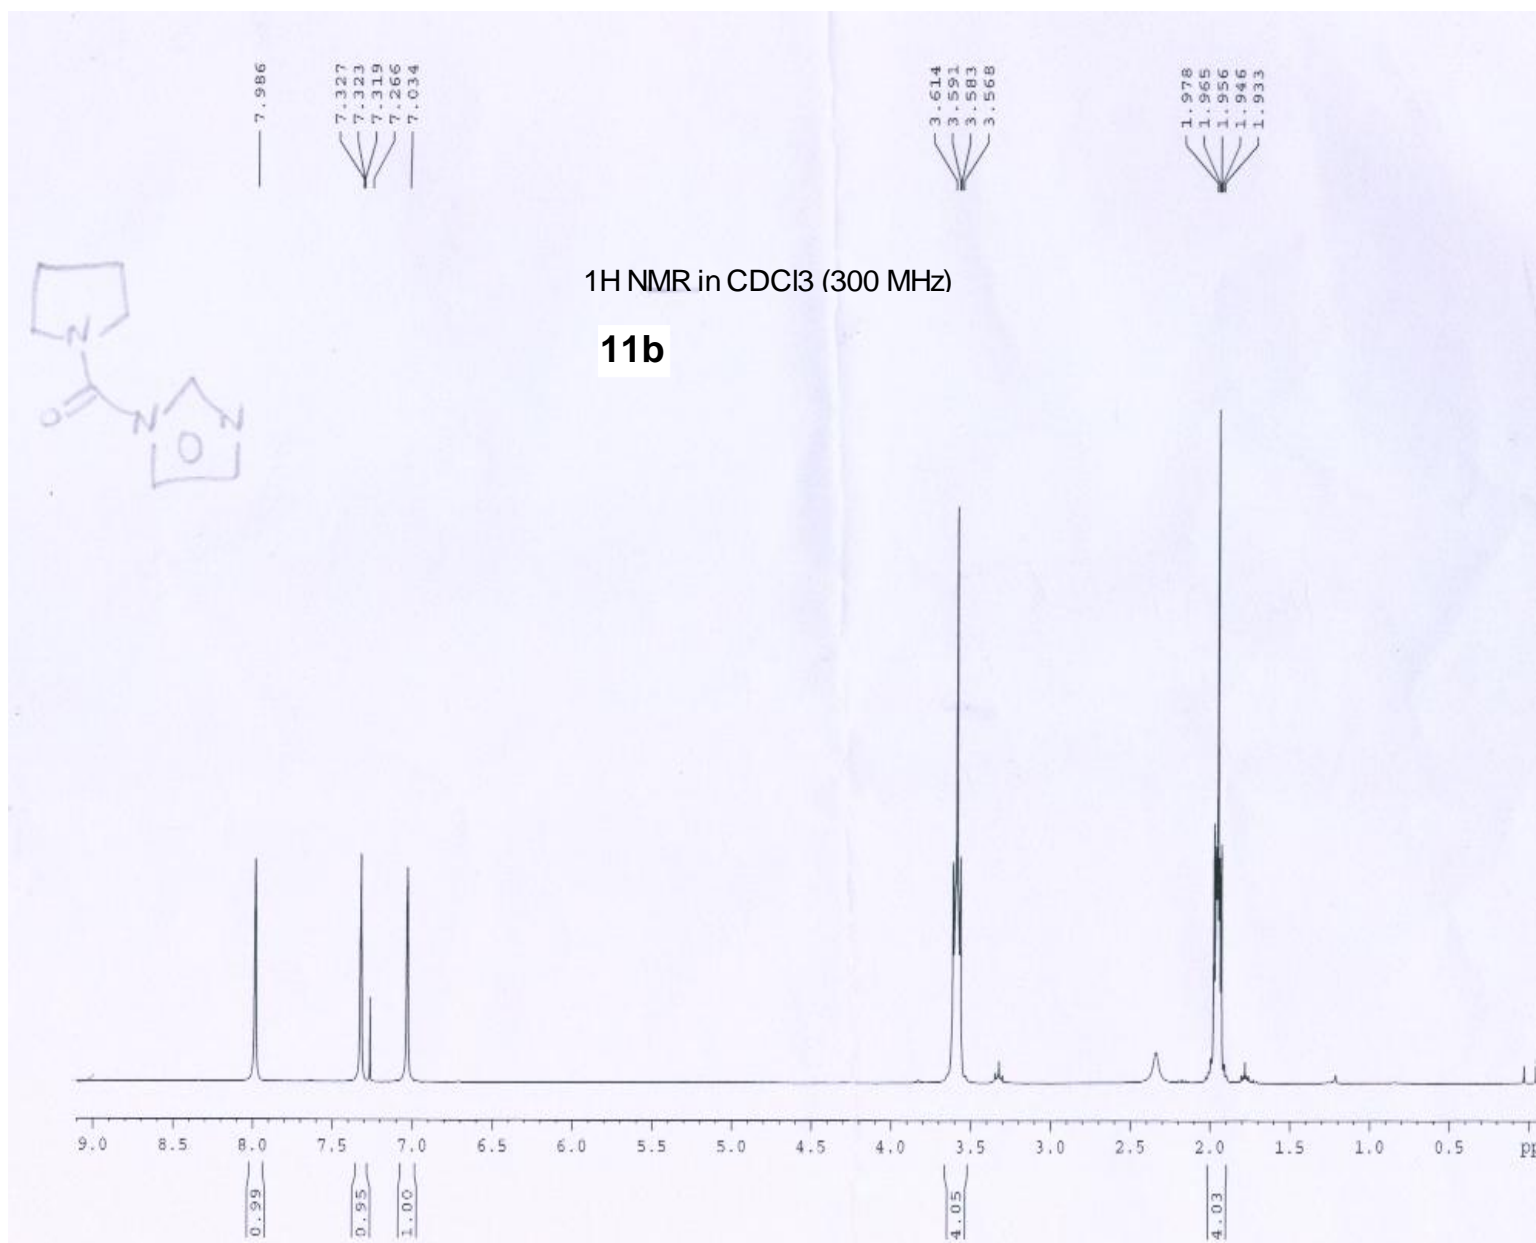

•

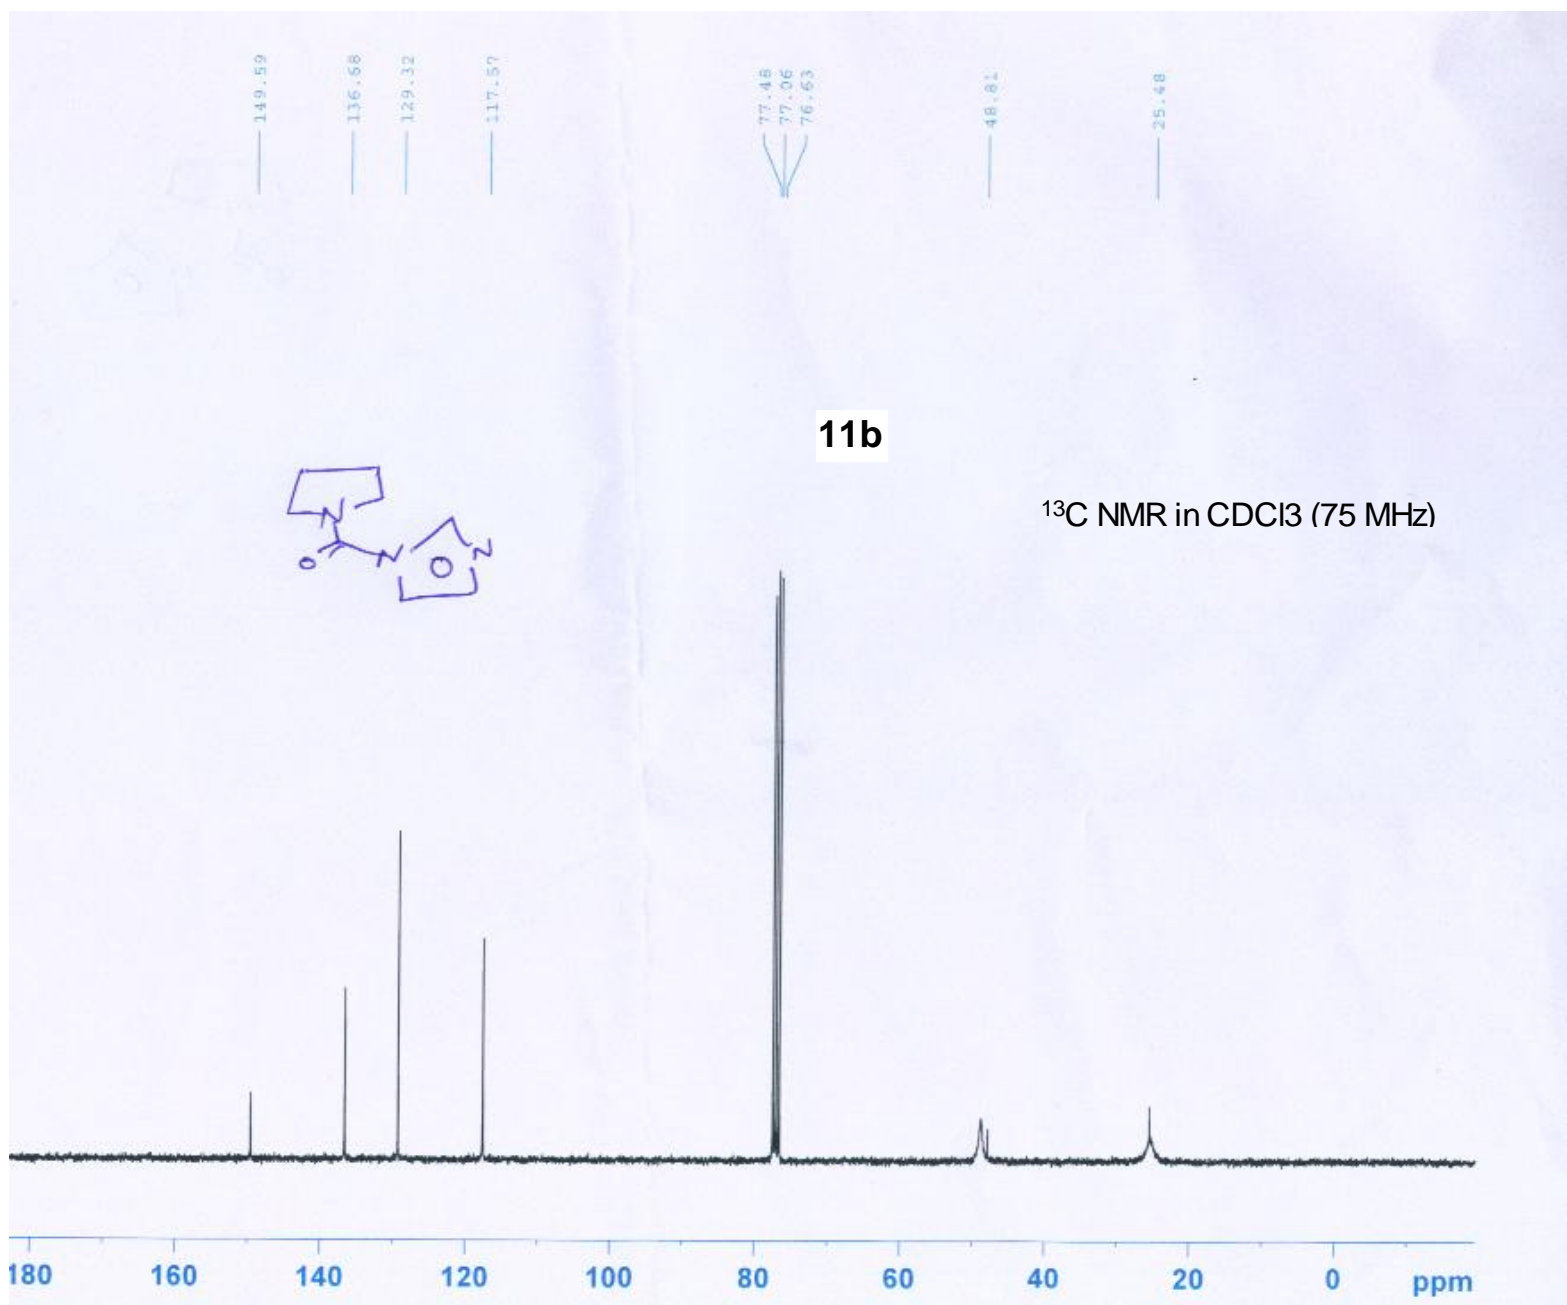



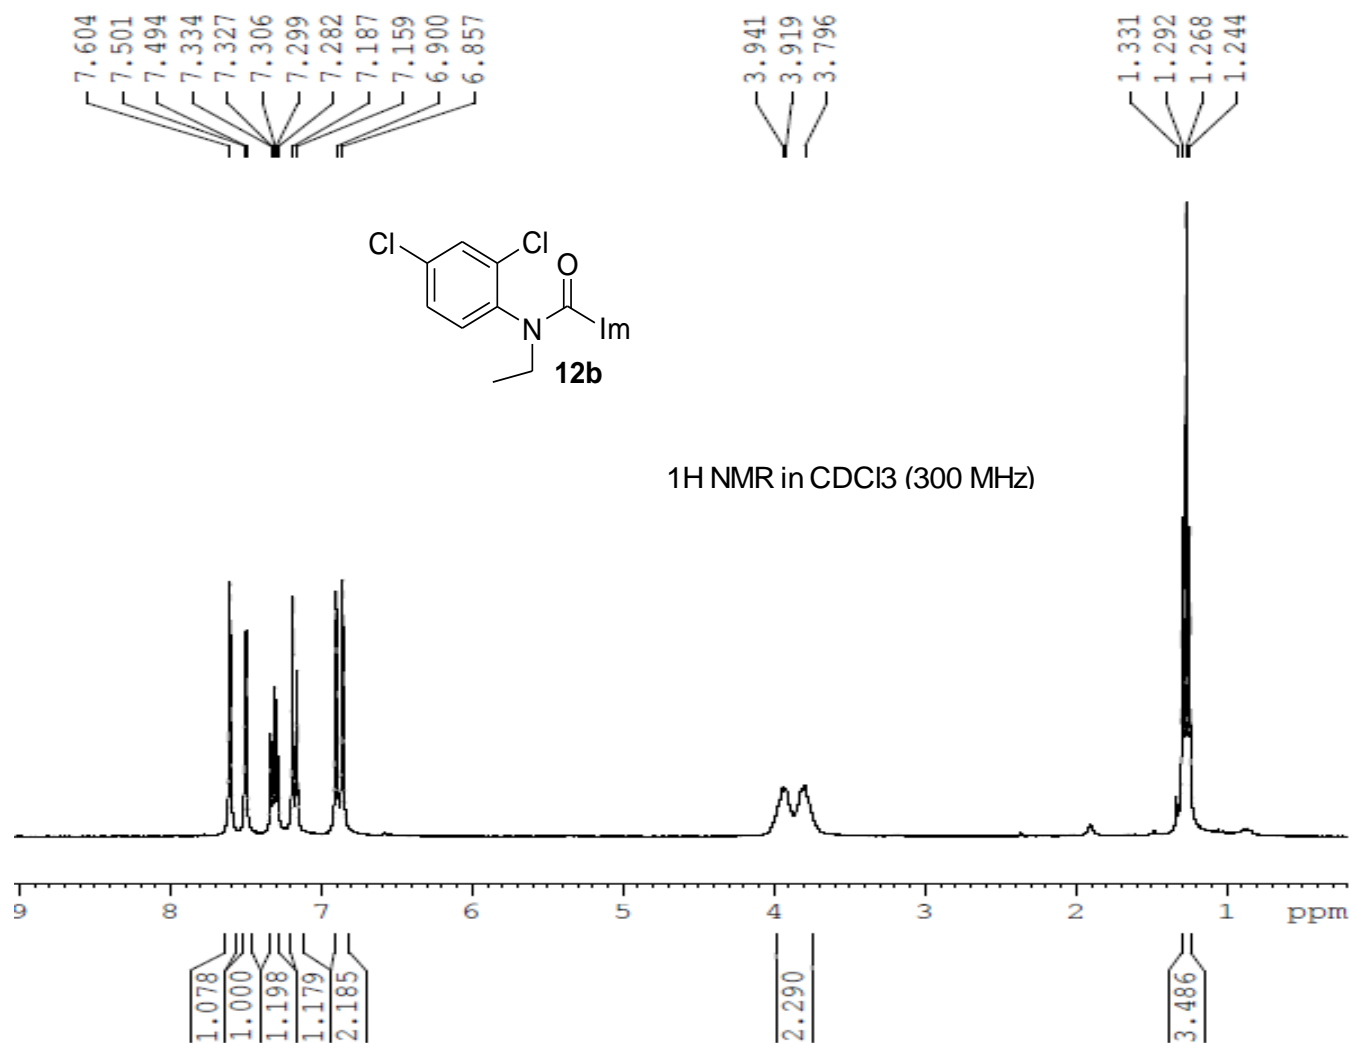

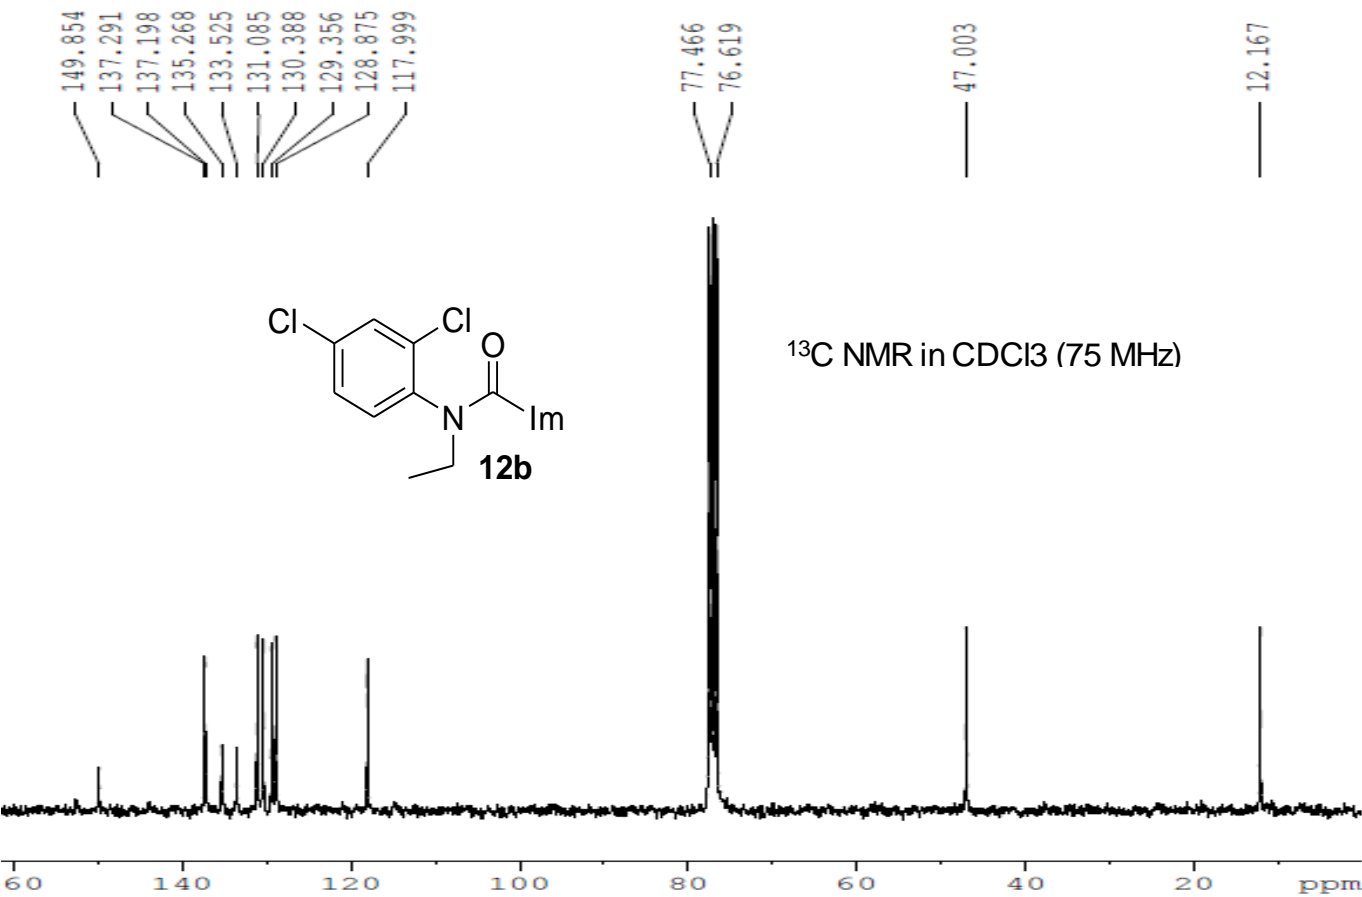

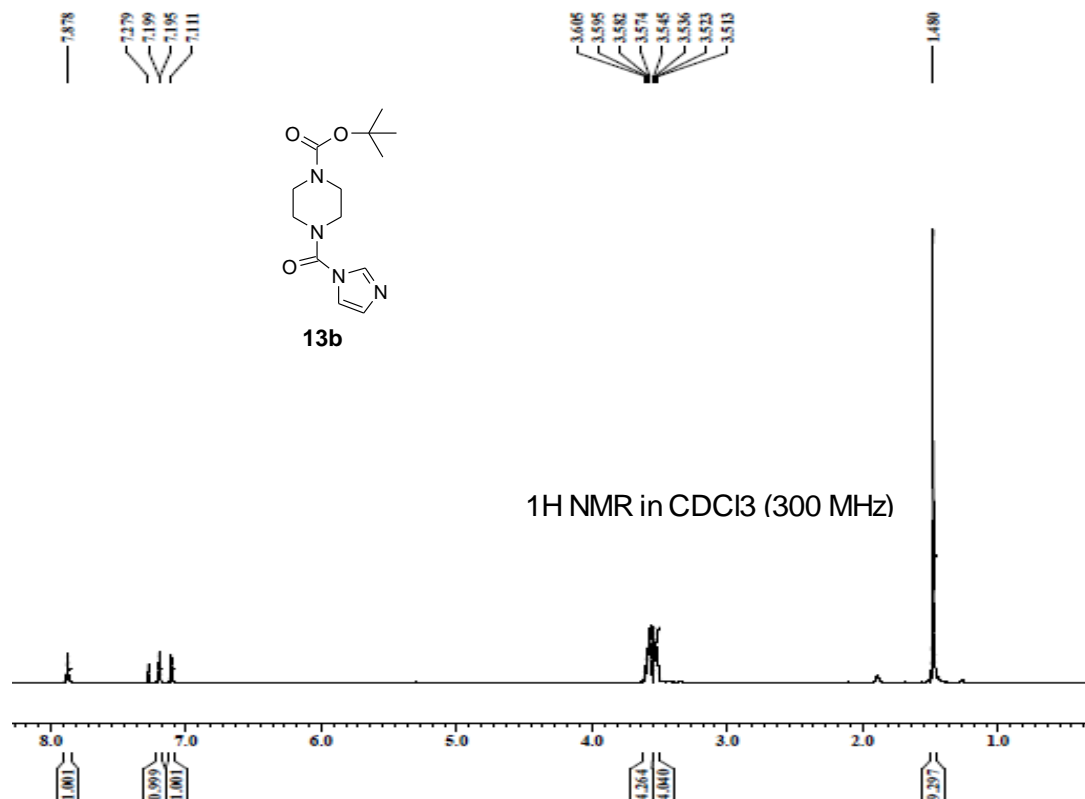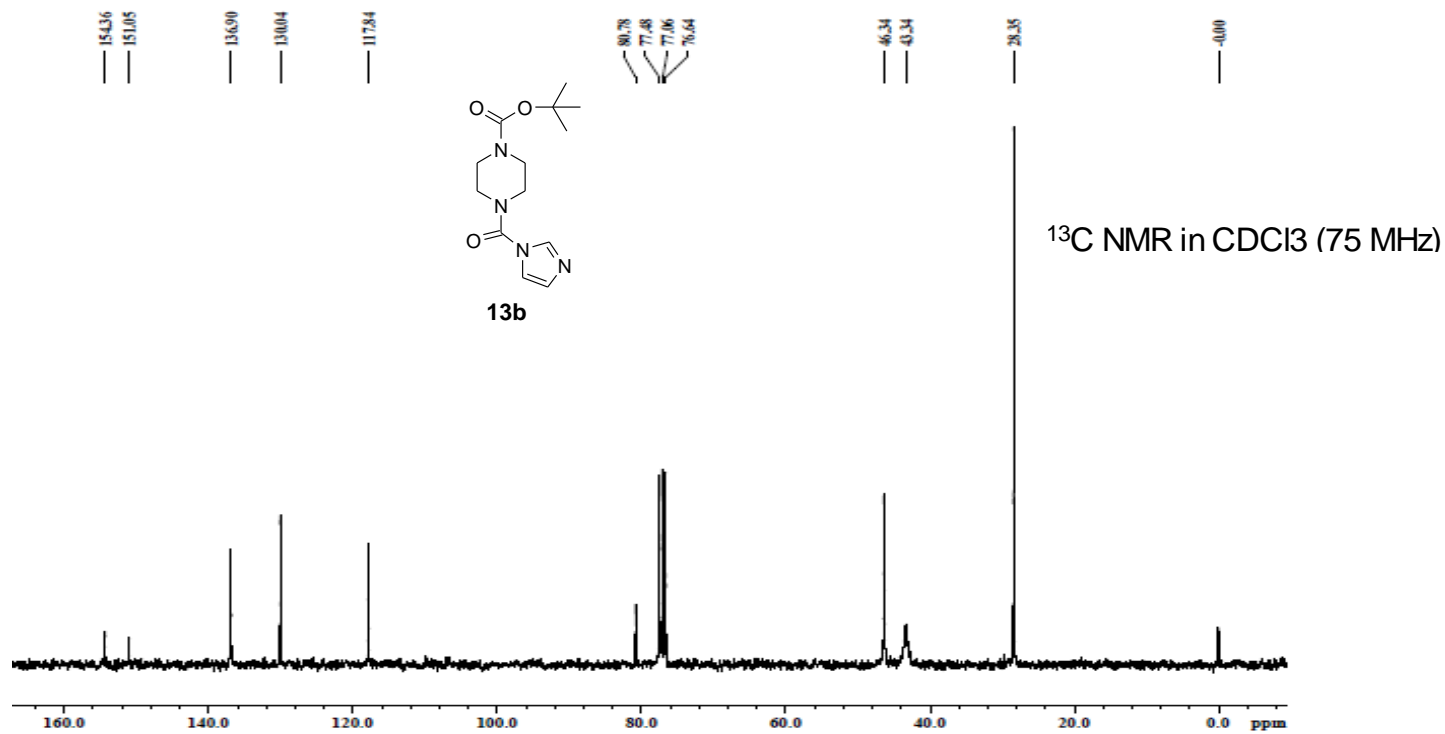

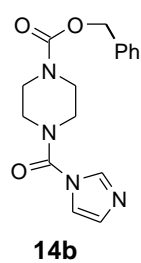

<sup>1</sup>H NMR in CDCl<sub>3</sub> (300 MHz)

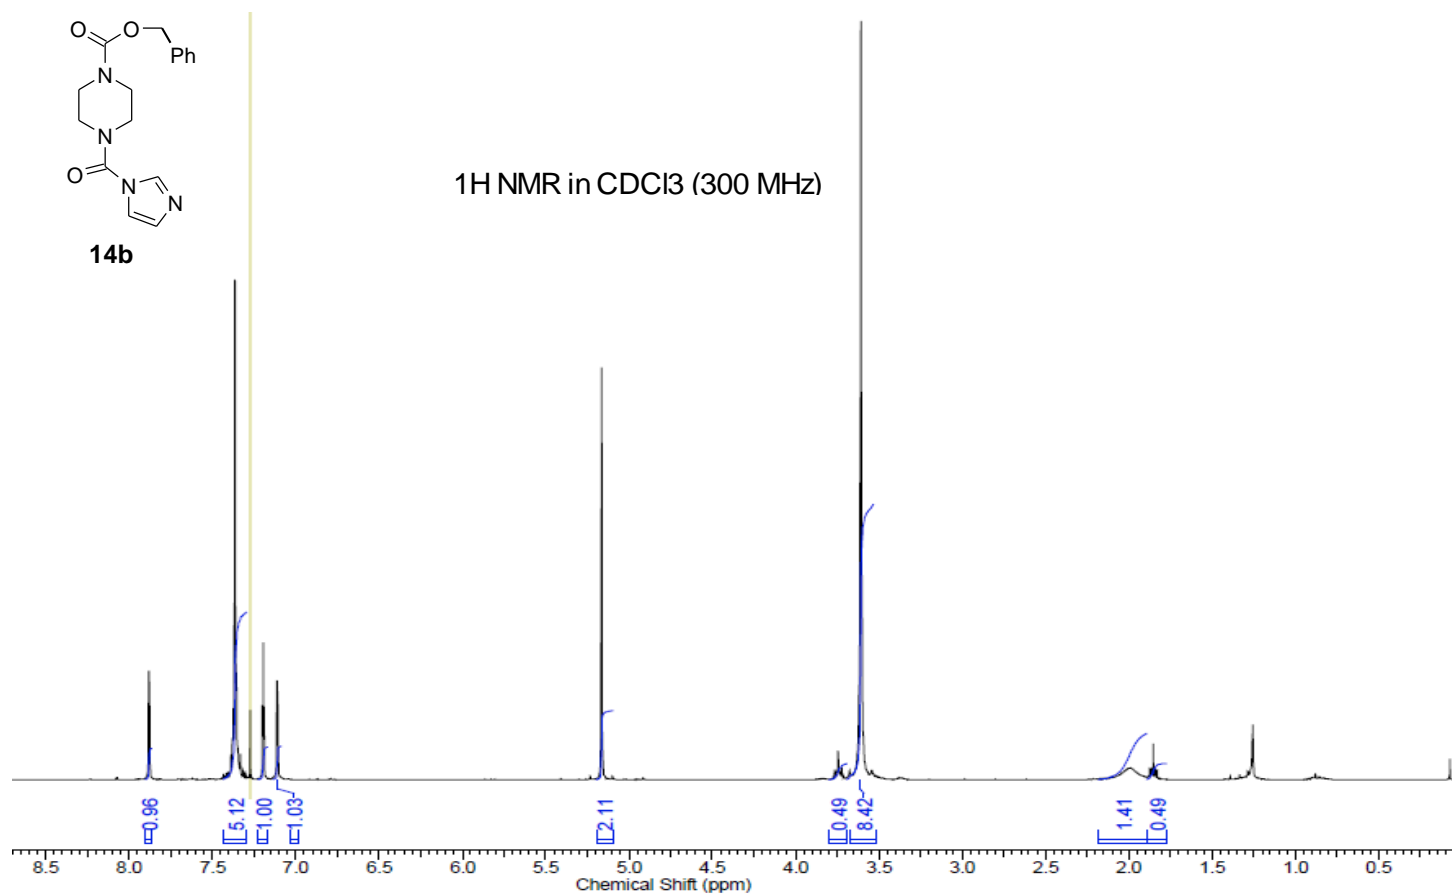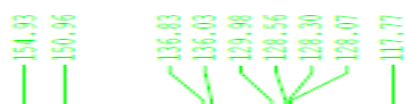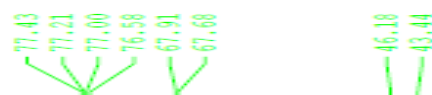

<sup>13</sup>C NMR in CDCl<sub>3</sub> (75 MHz)

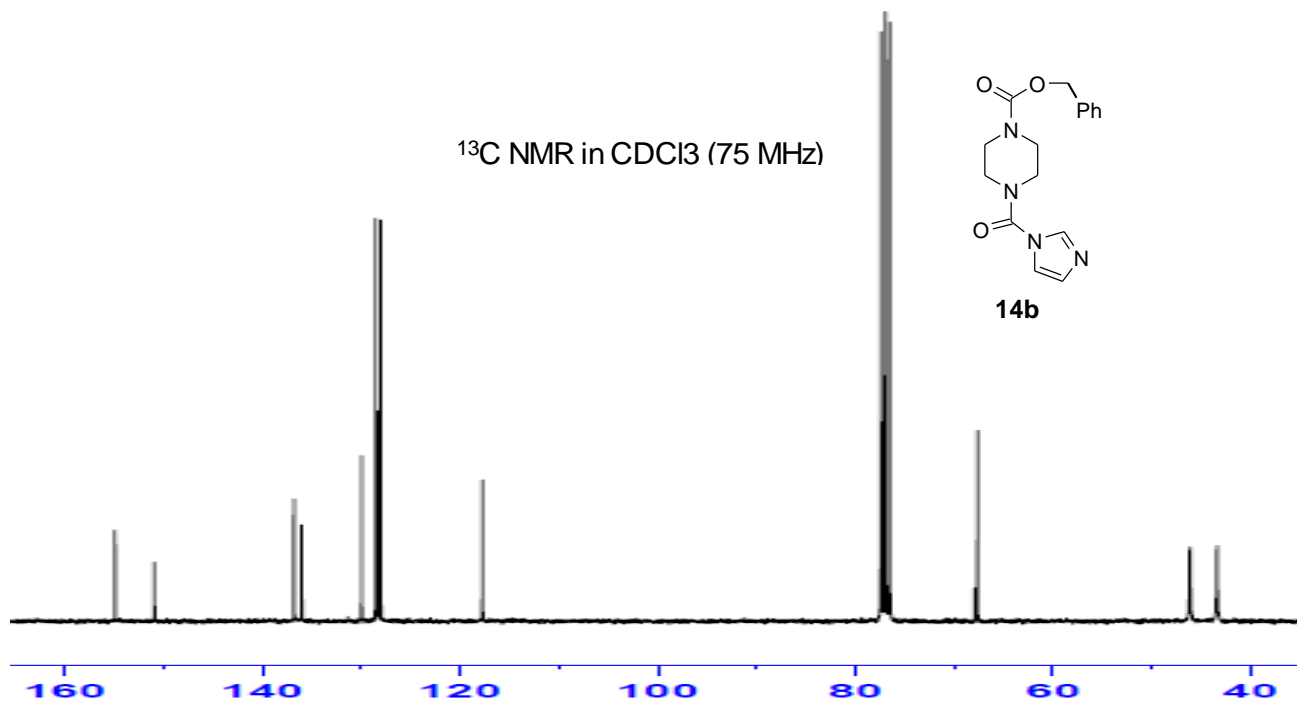

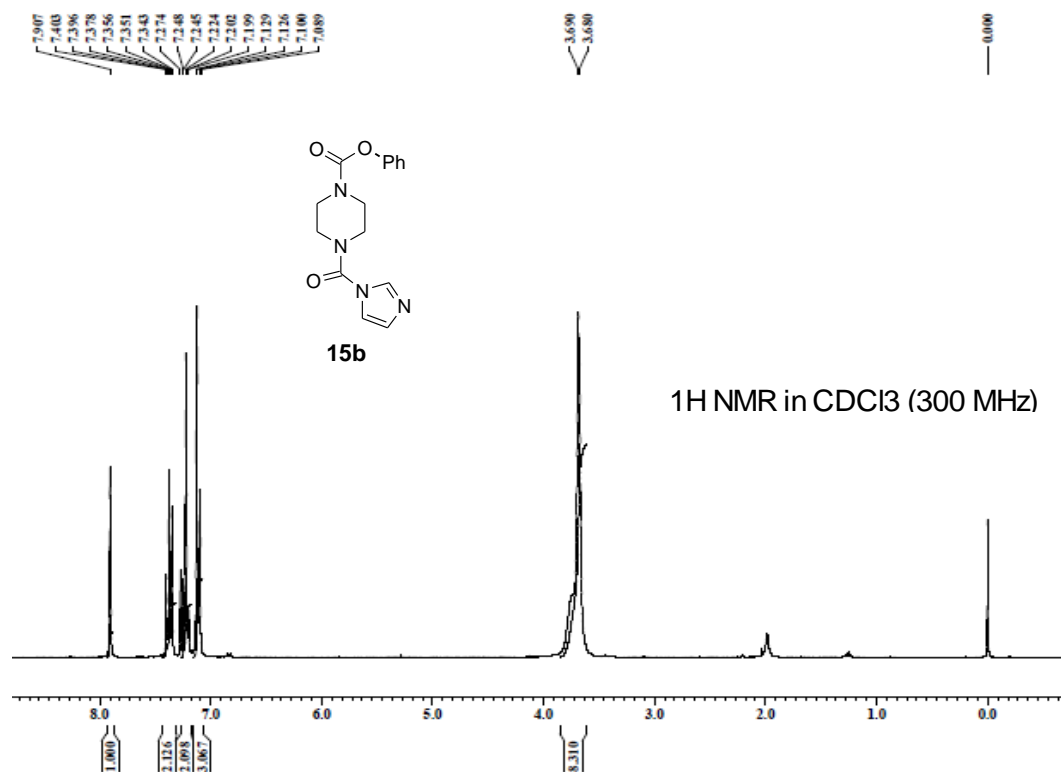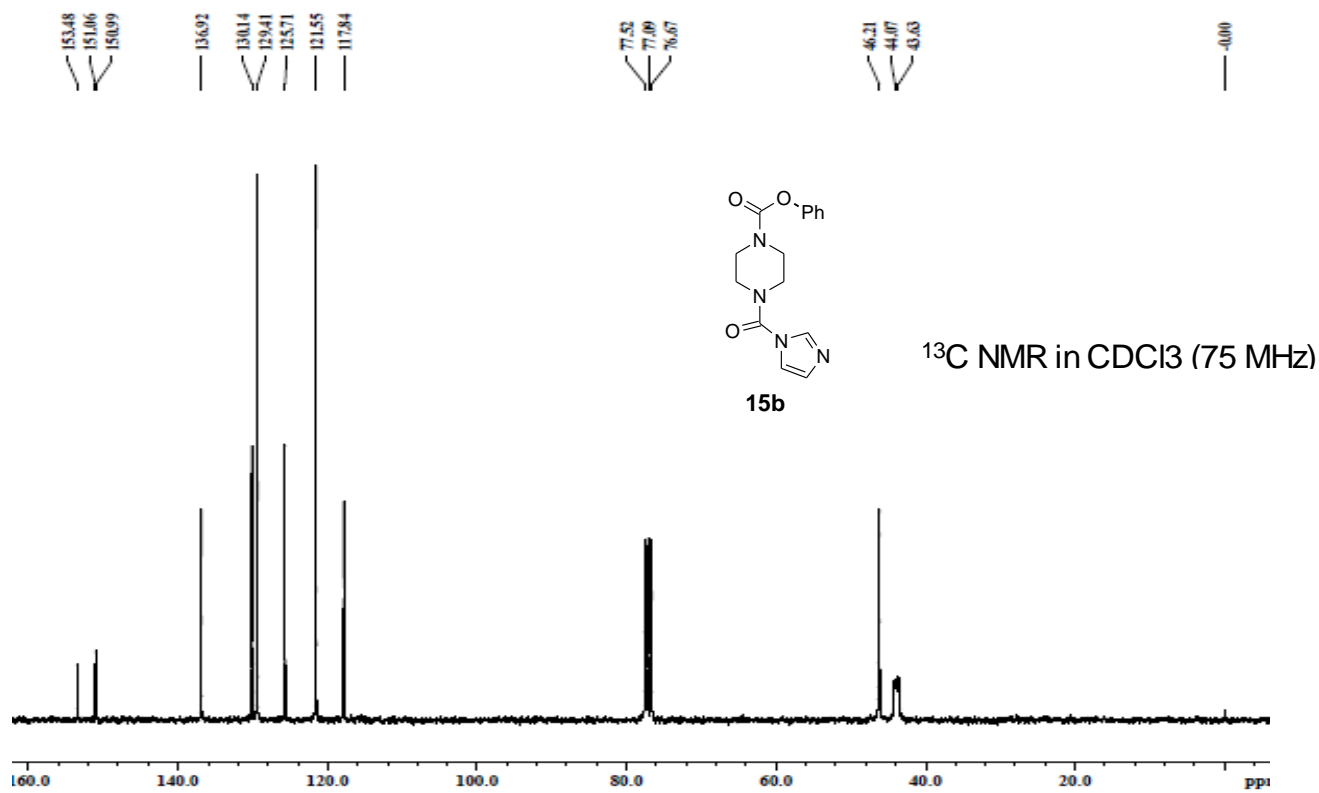

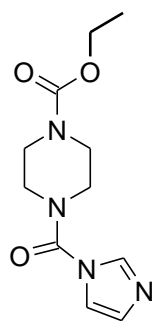

**16b**

<sup>1</sup>H NMR in CDCl<sub>3</sub> (300 MHz)

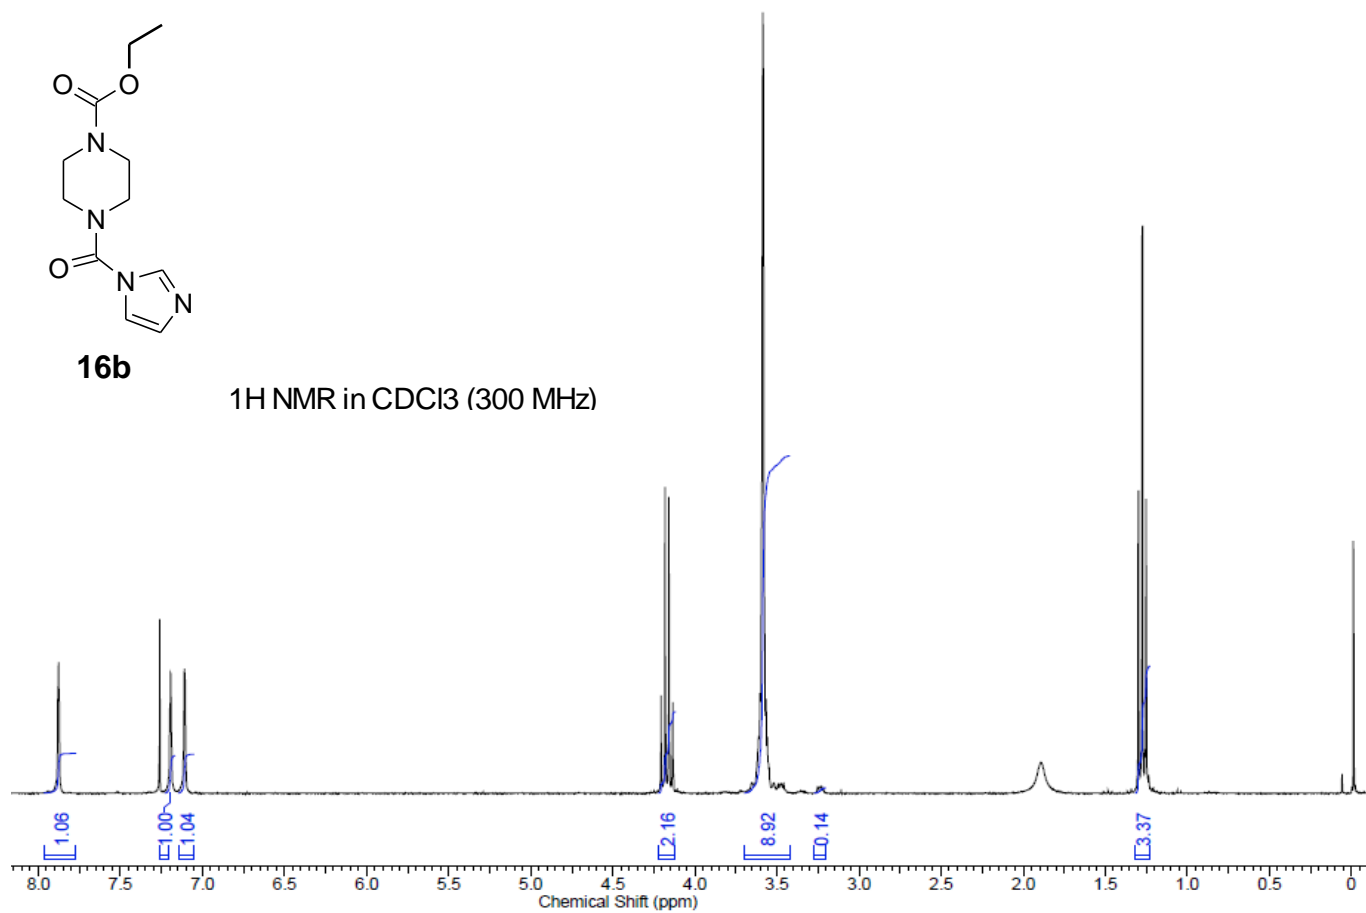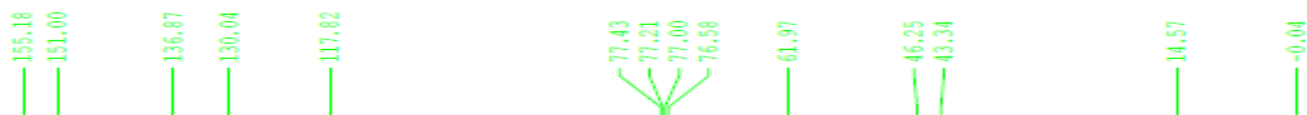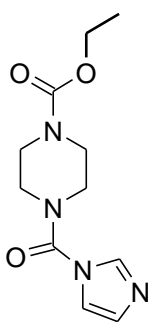

**16b**

<sup>13</sup>C NMR in CDCl<sub>3</sub> (75 MHz)

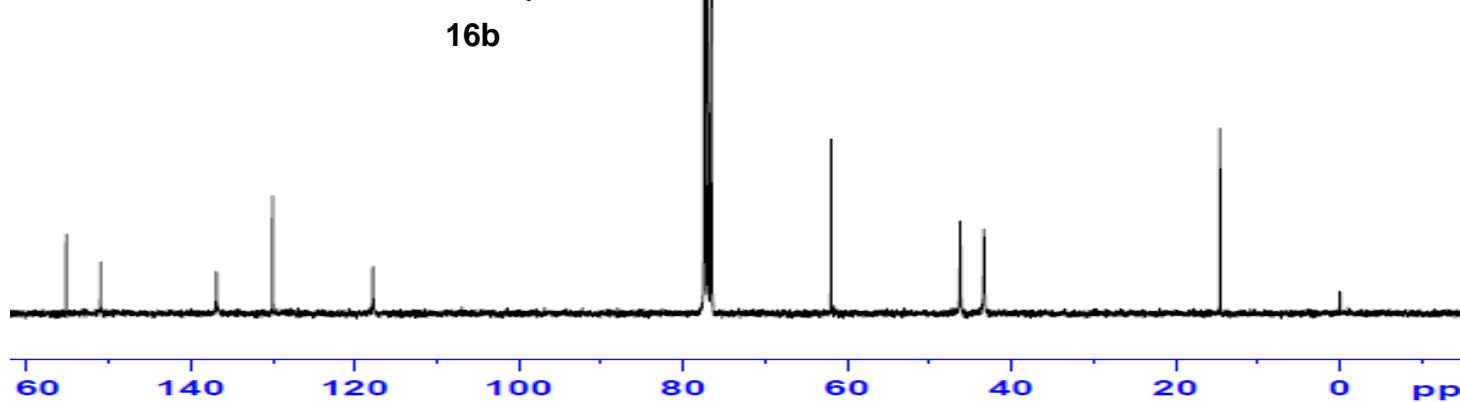

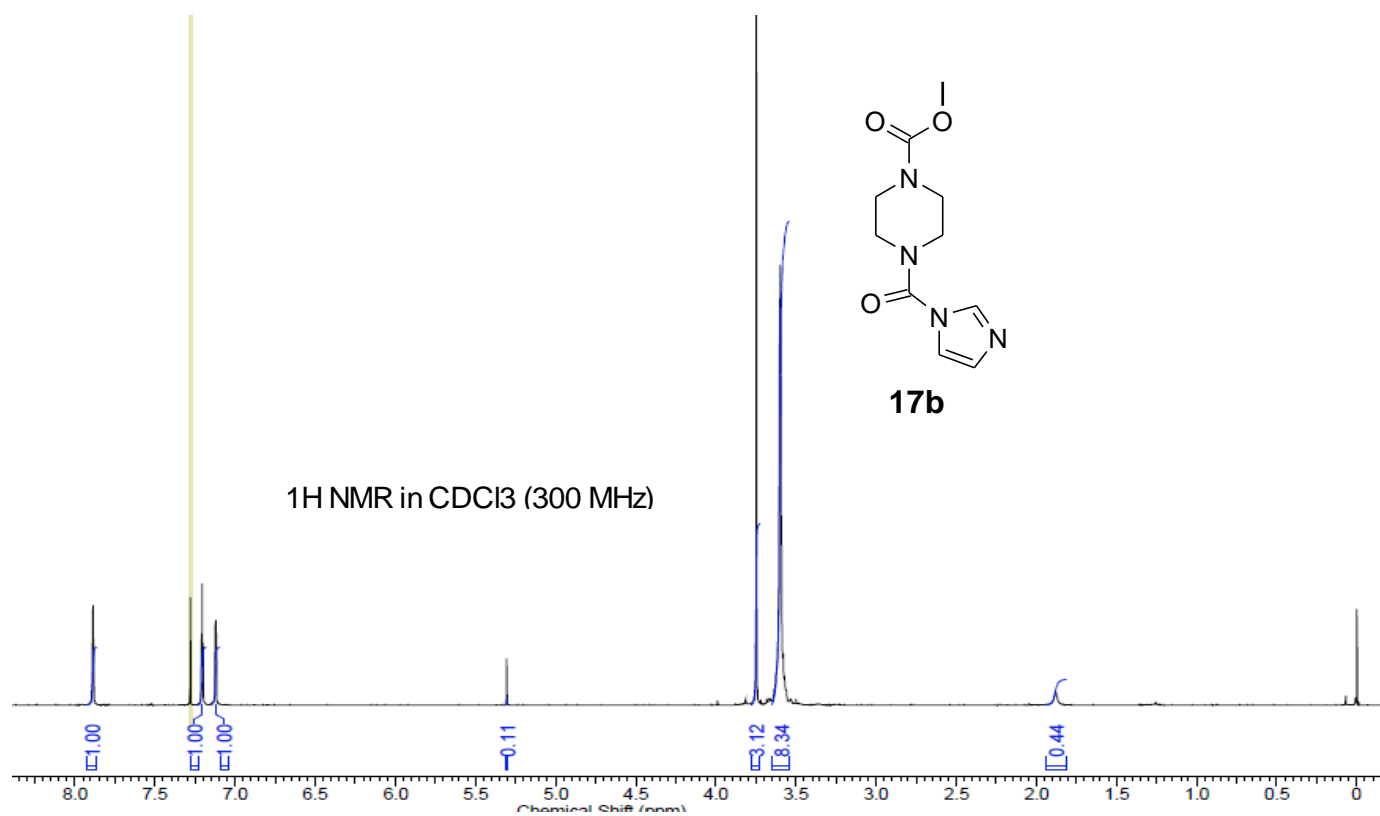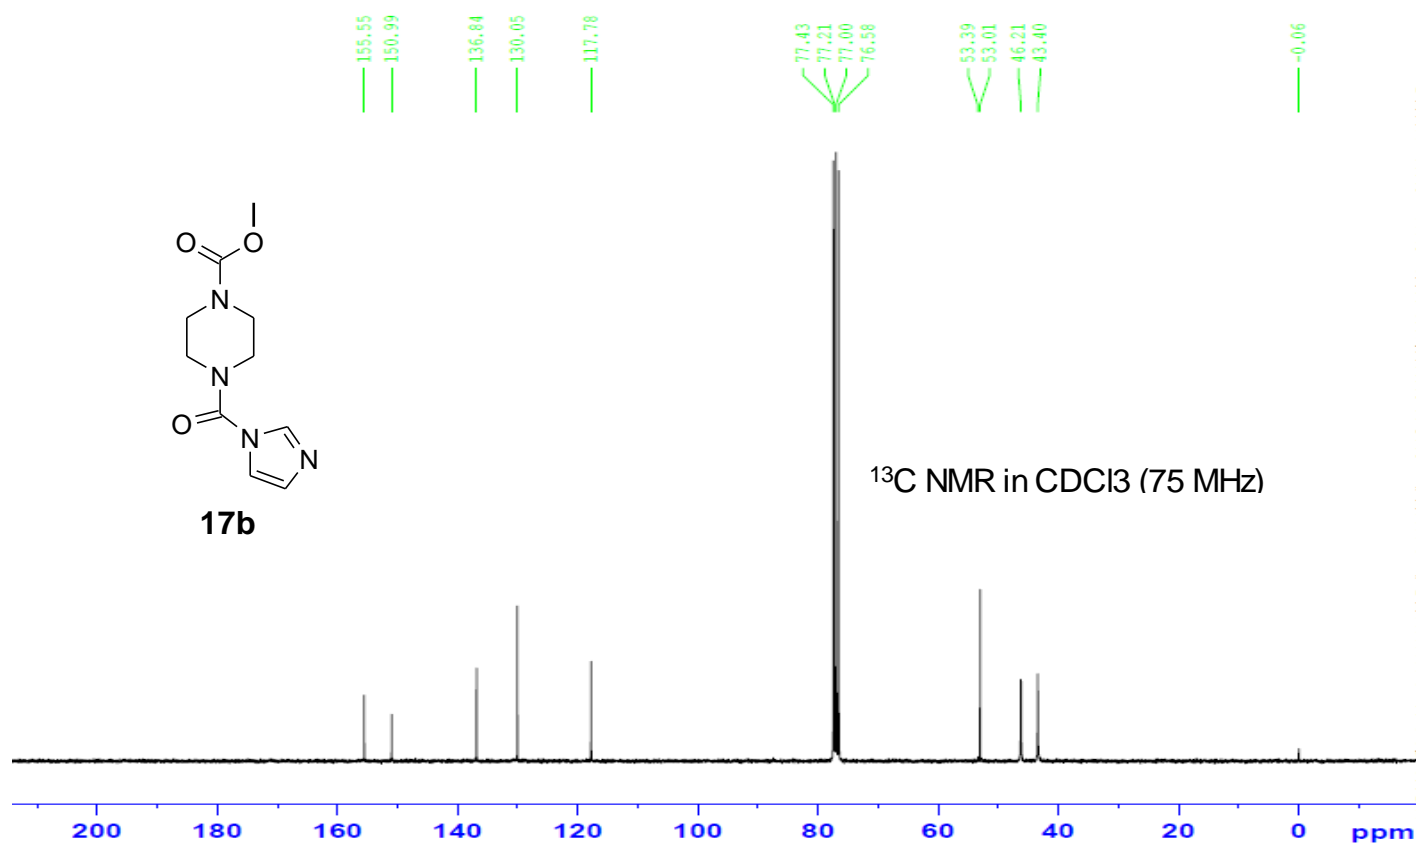

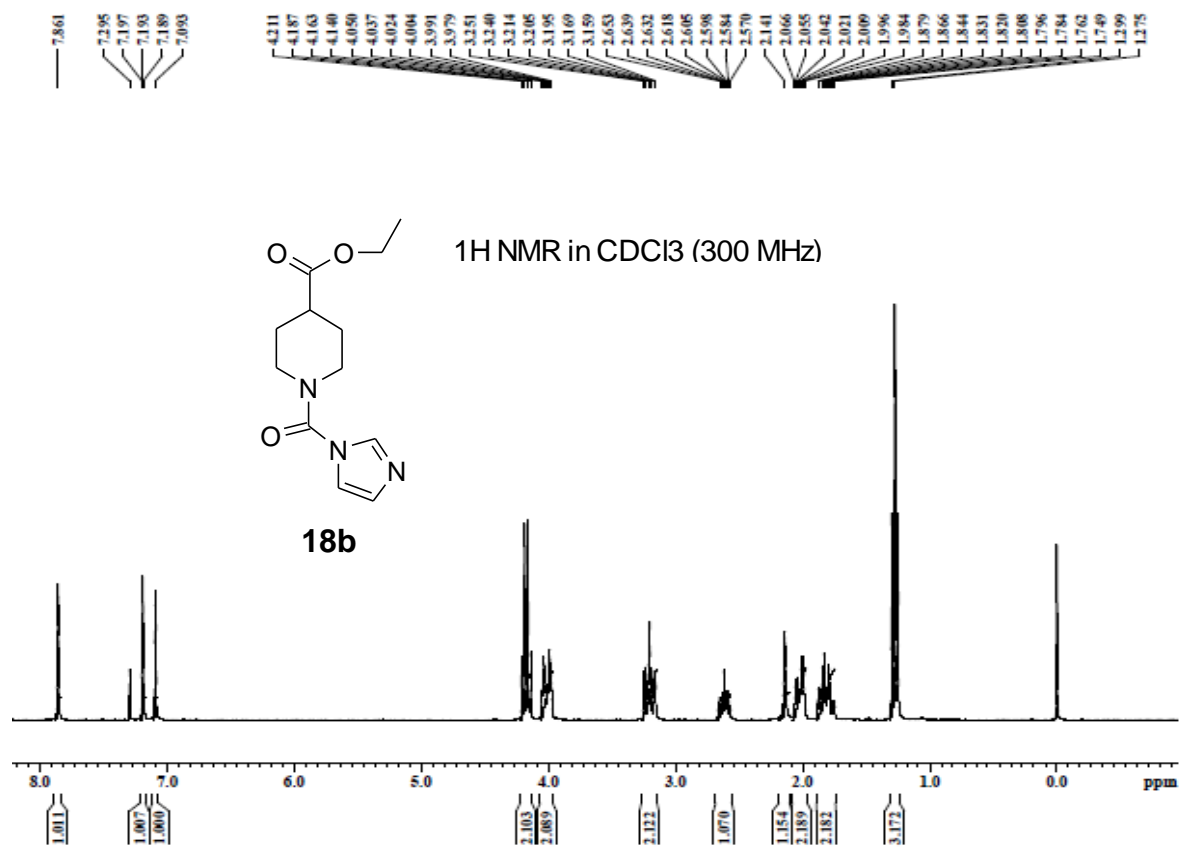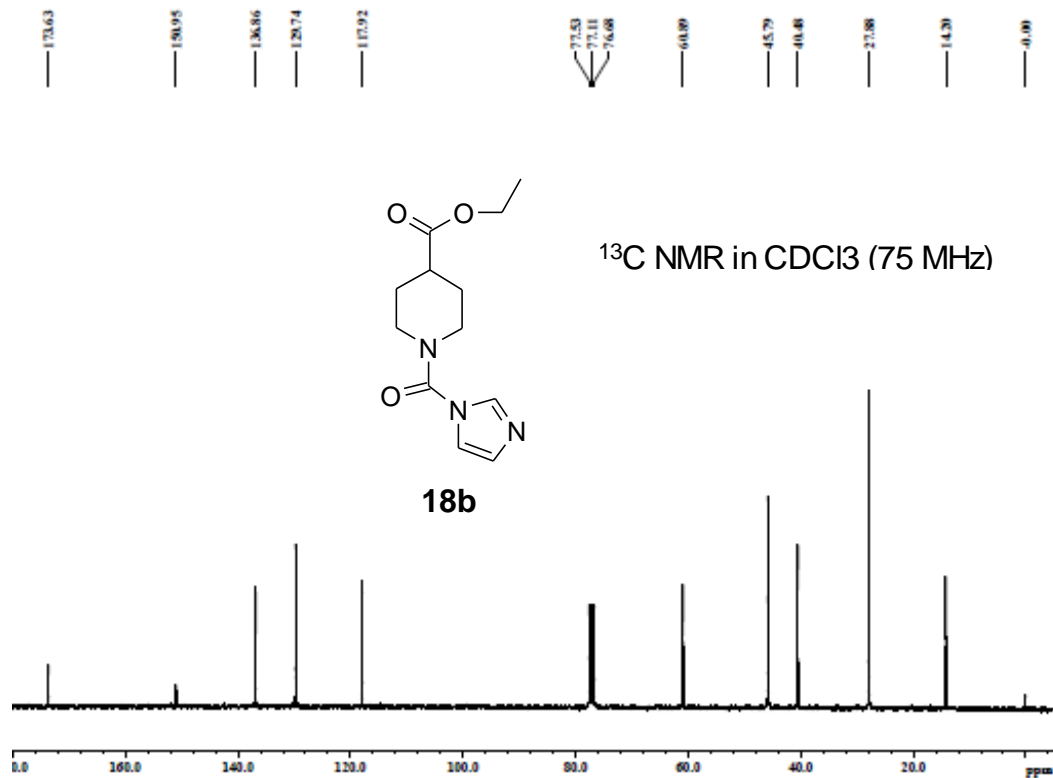



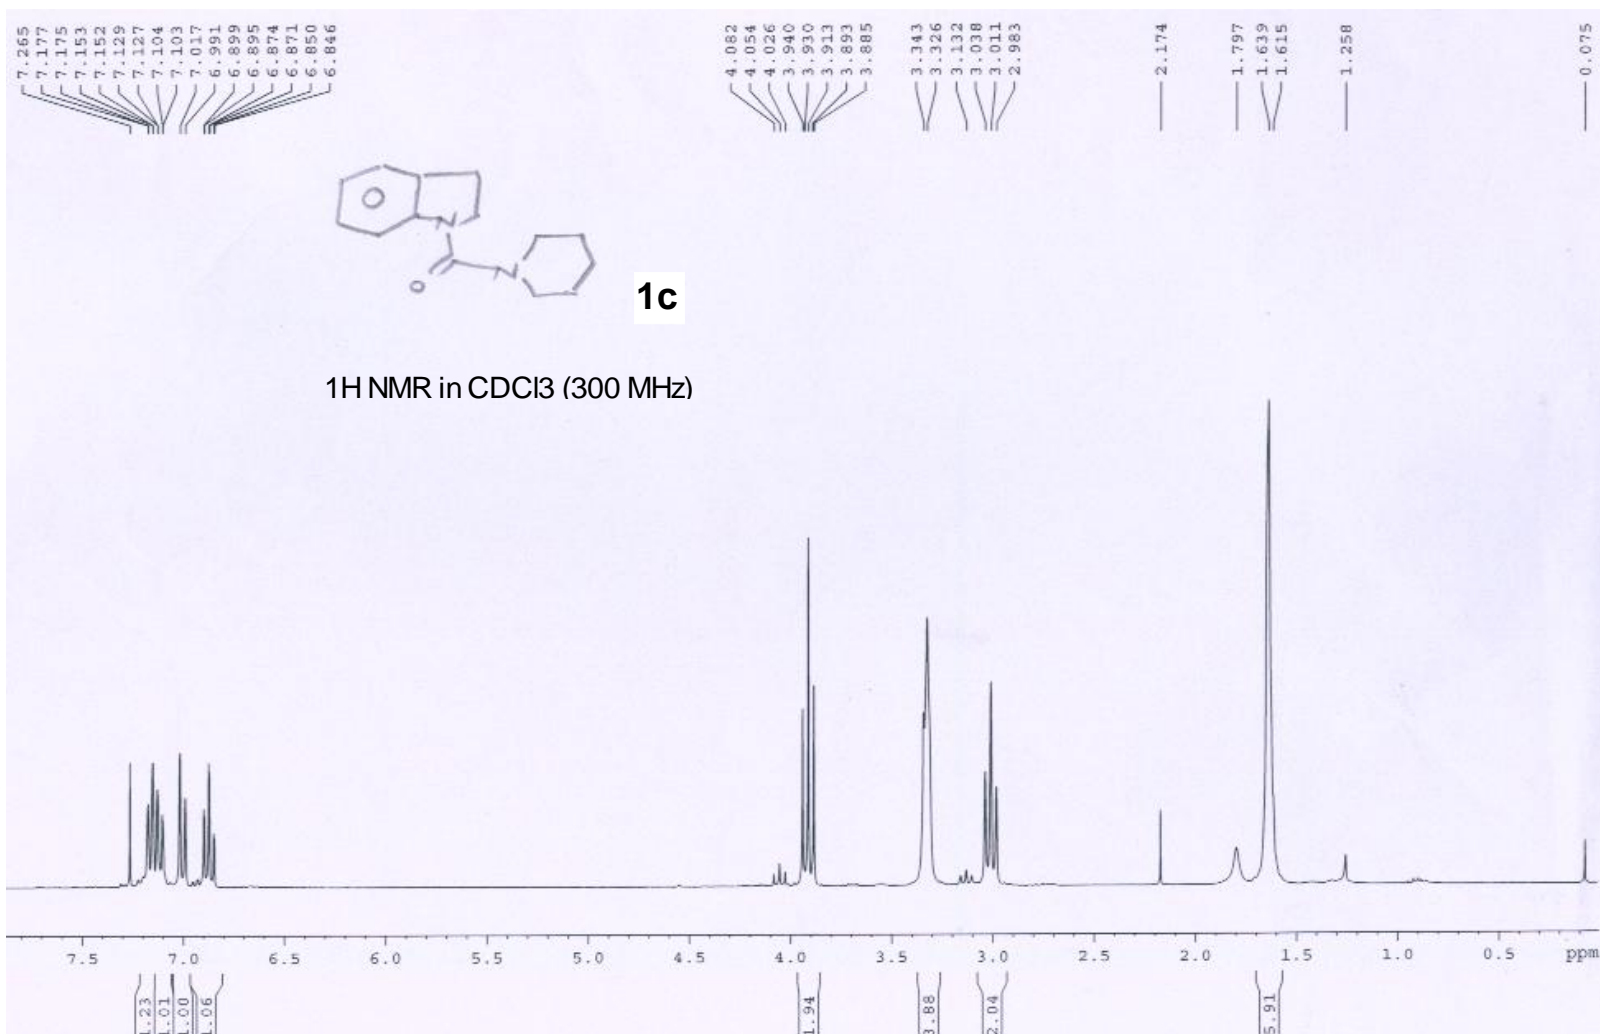

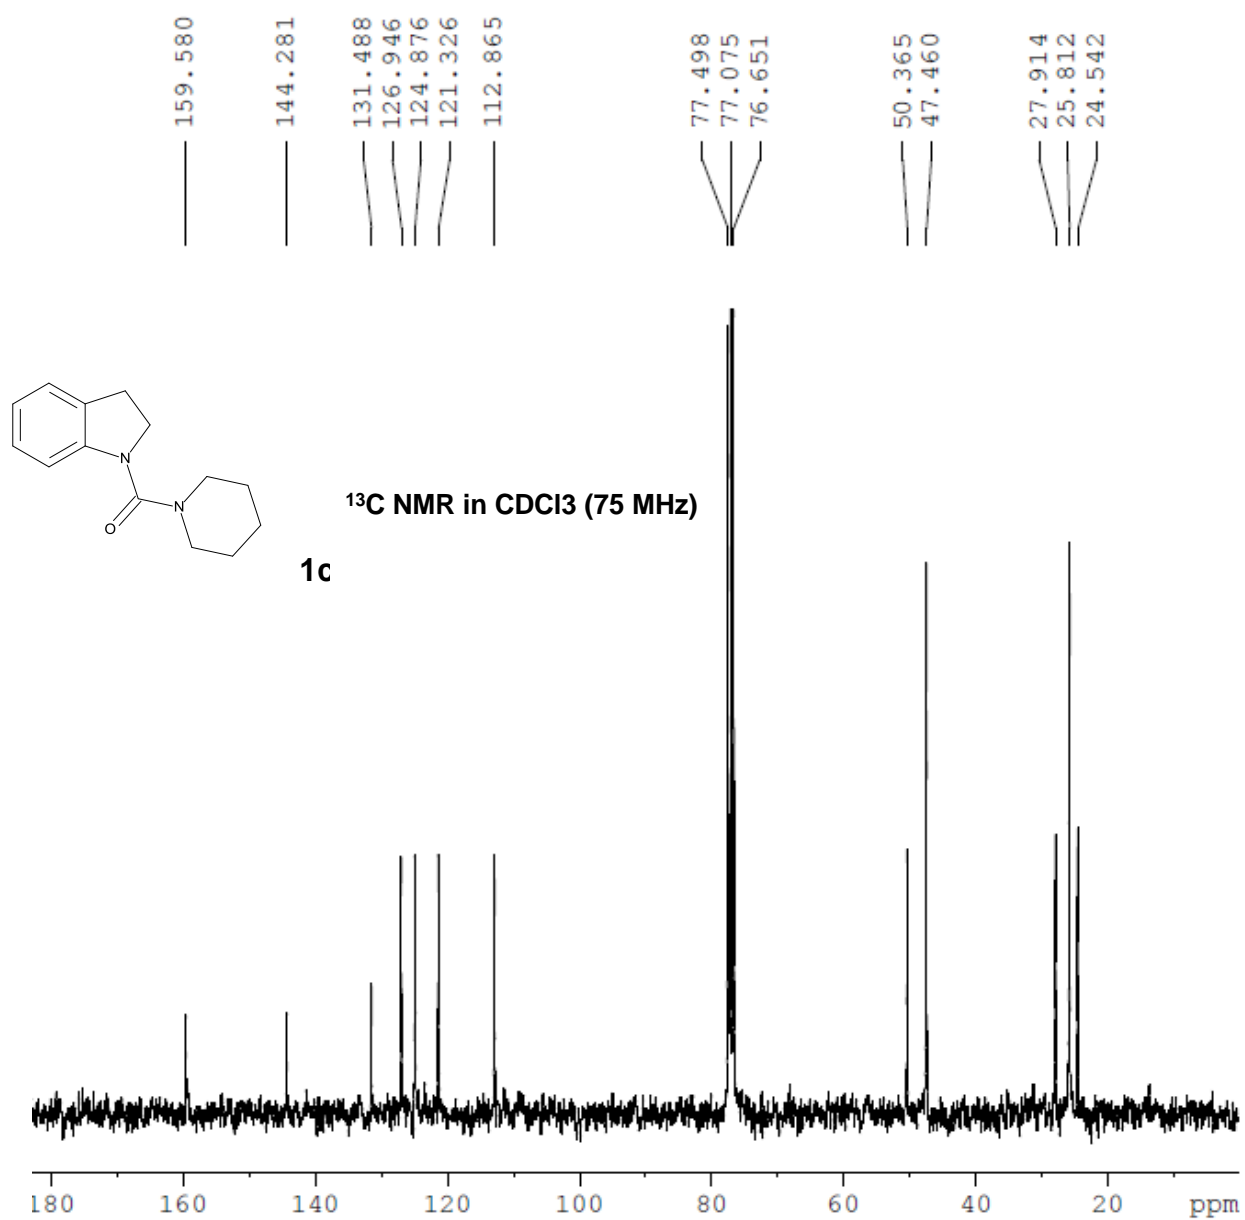

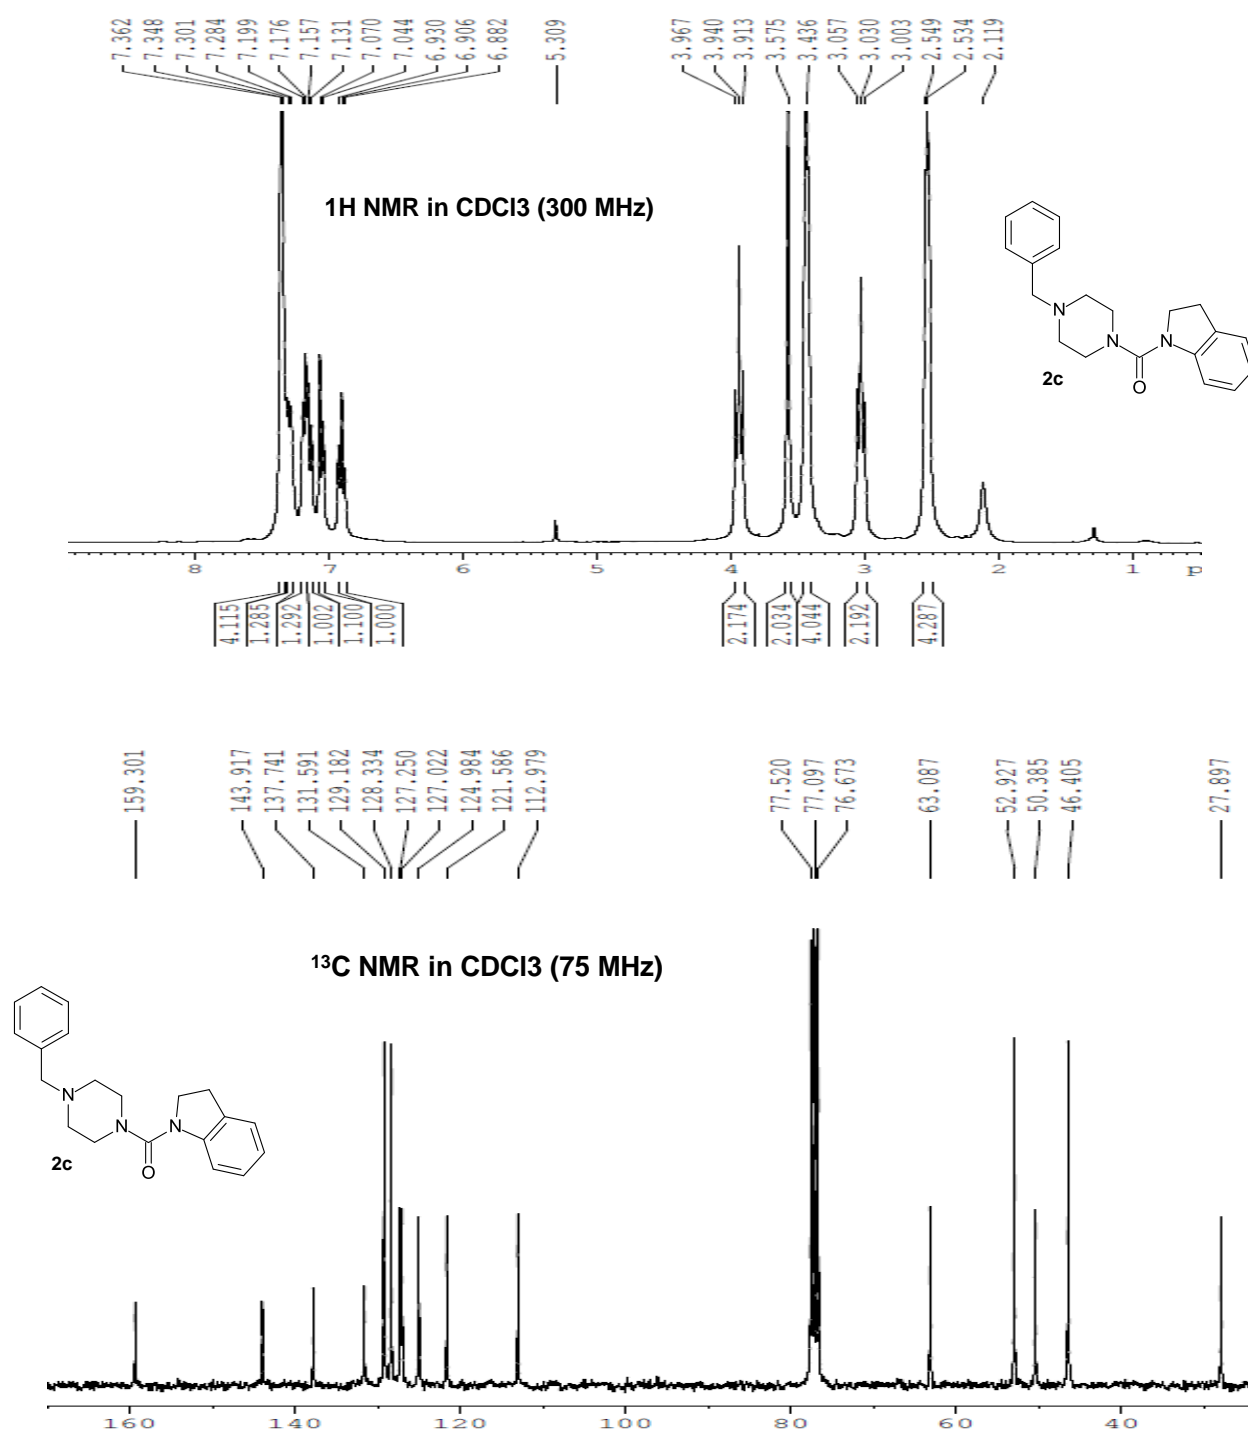

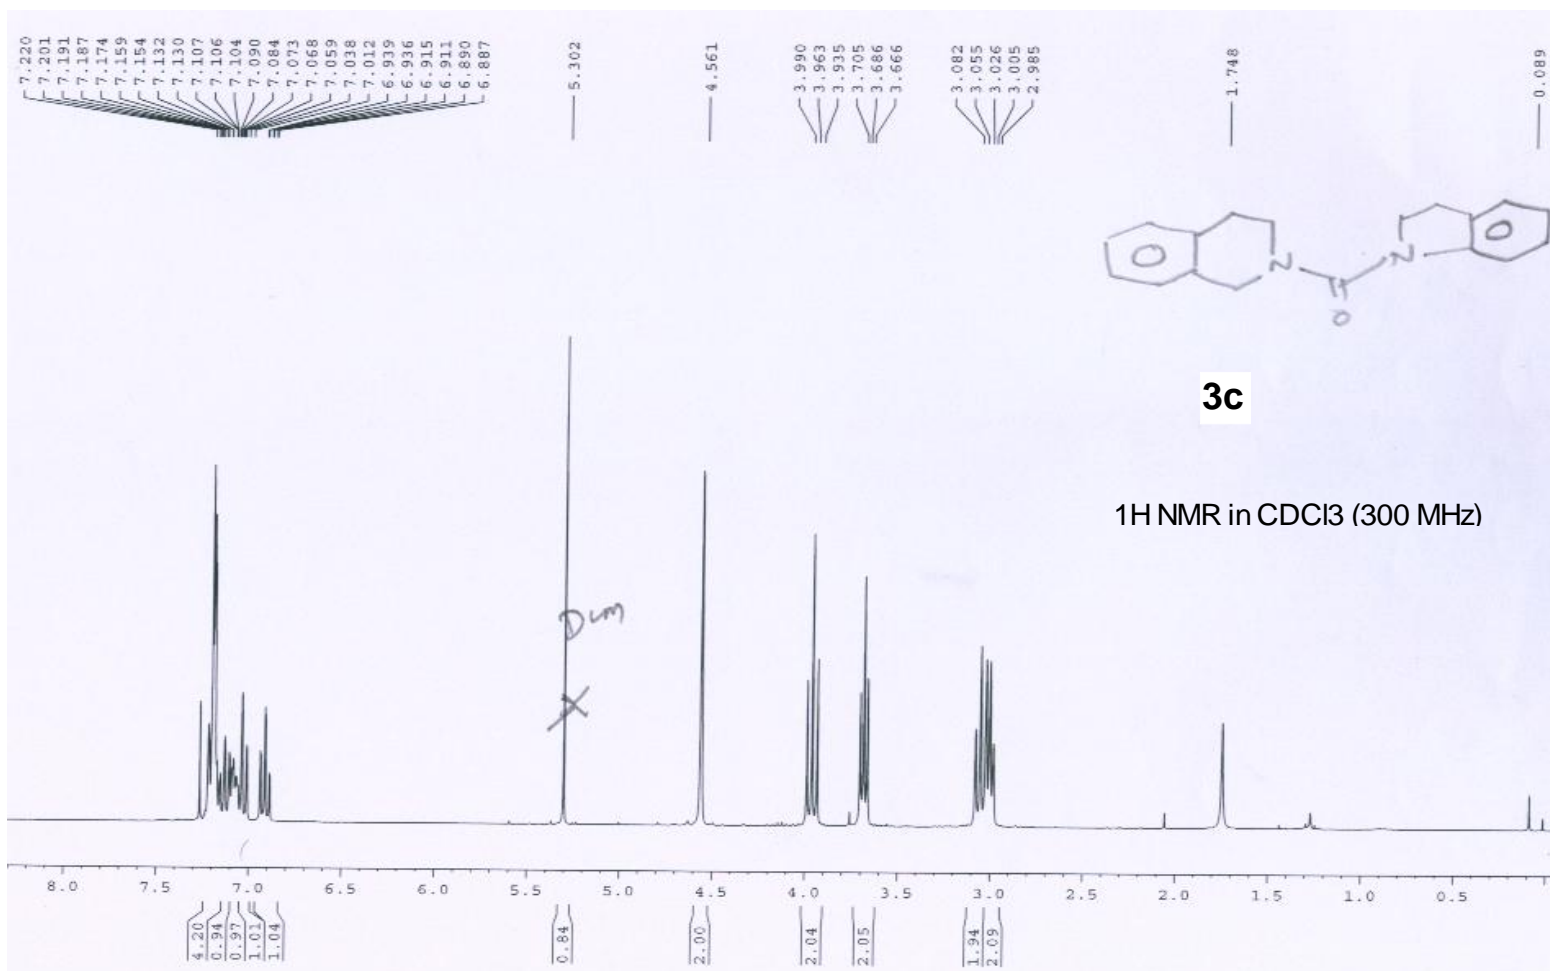

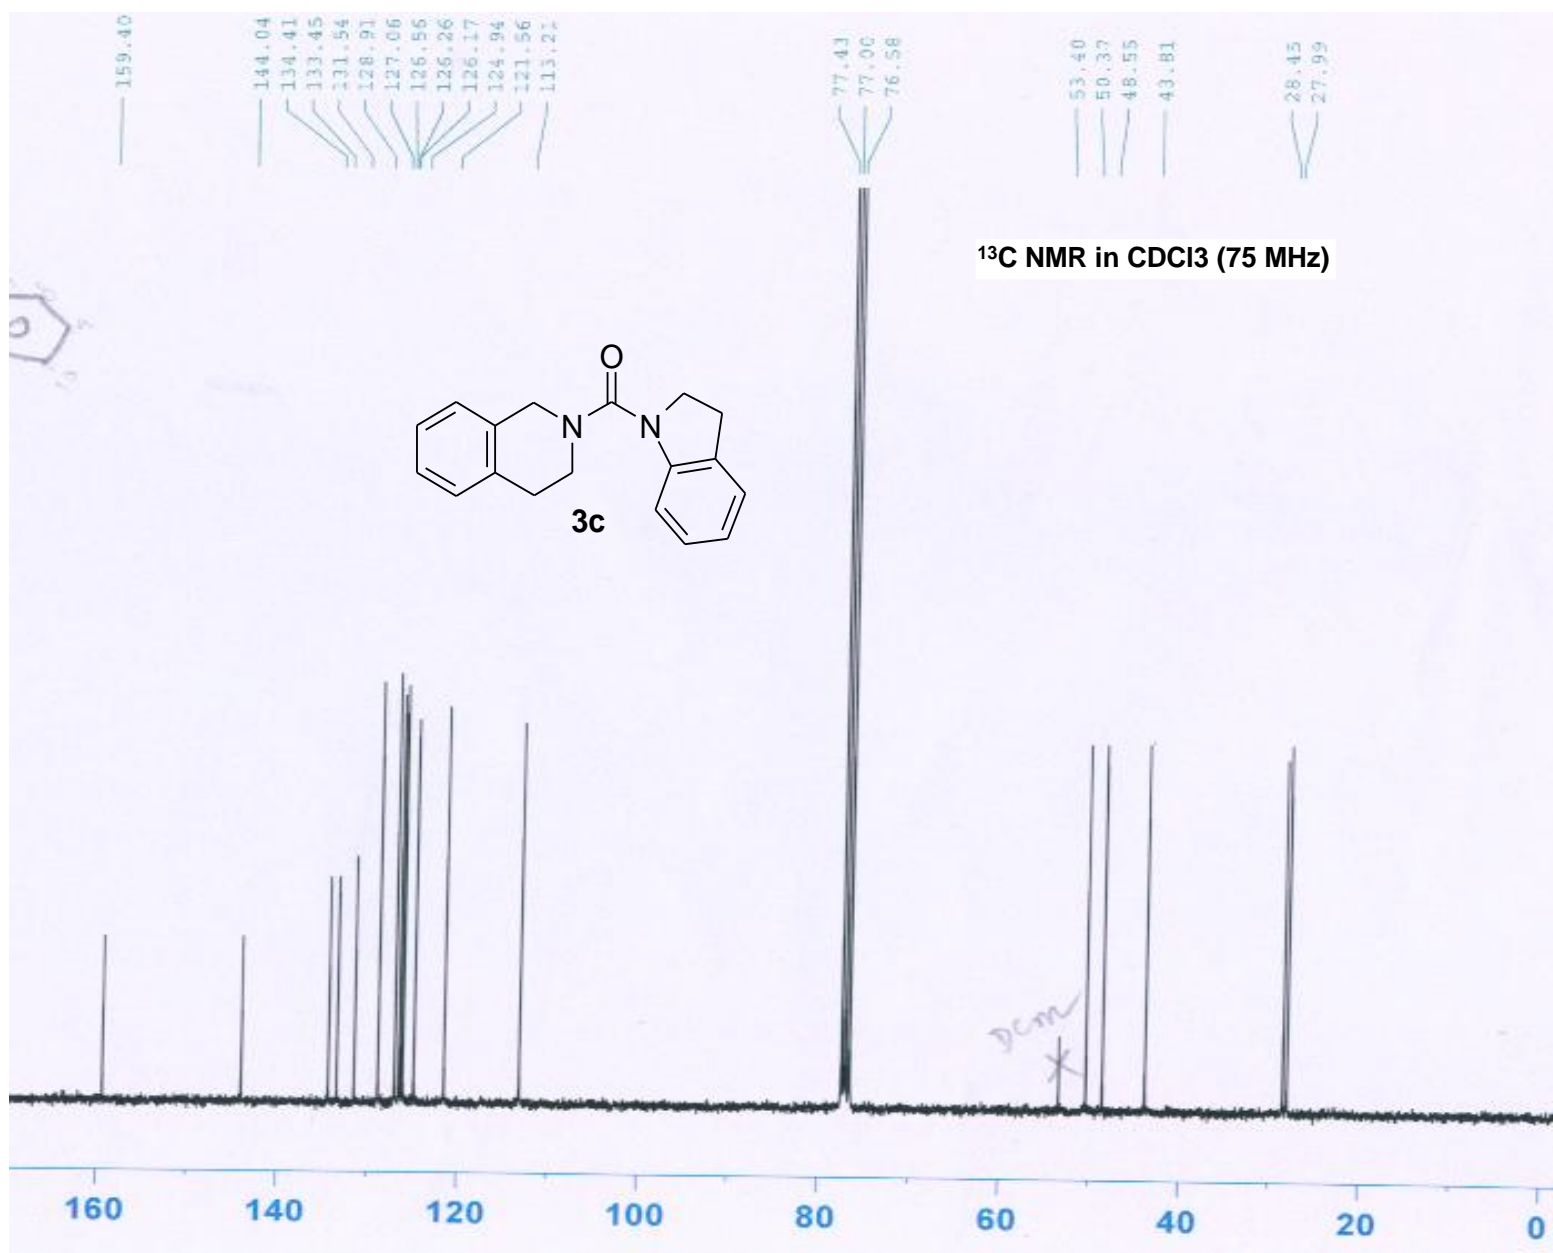

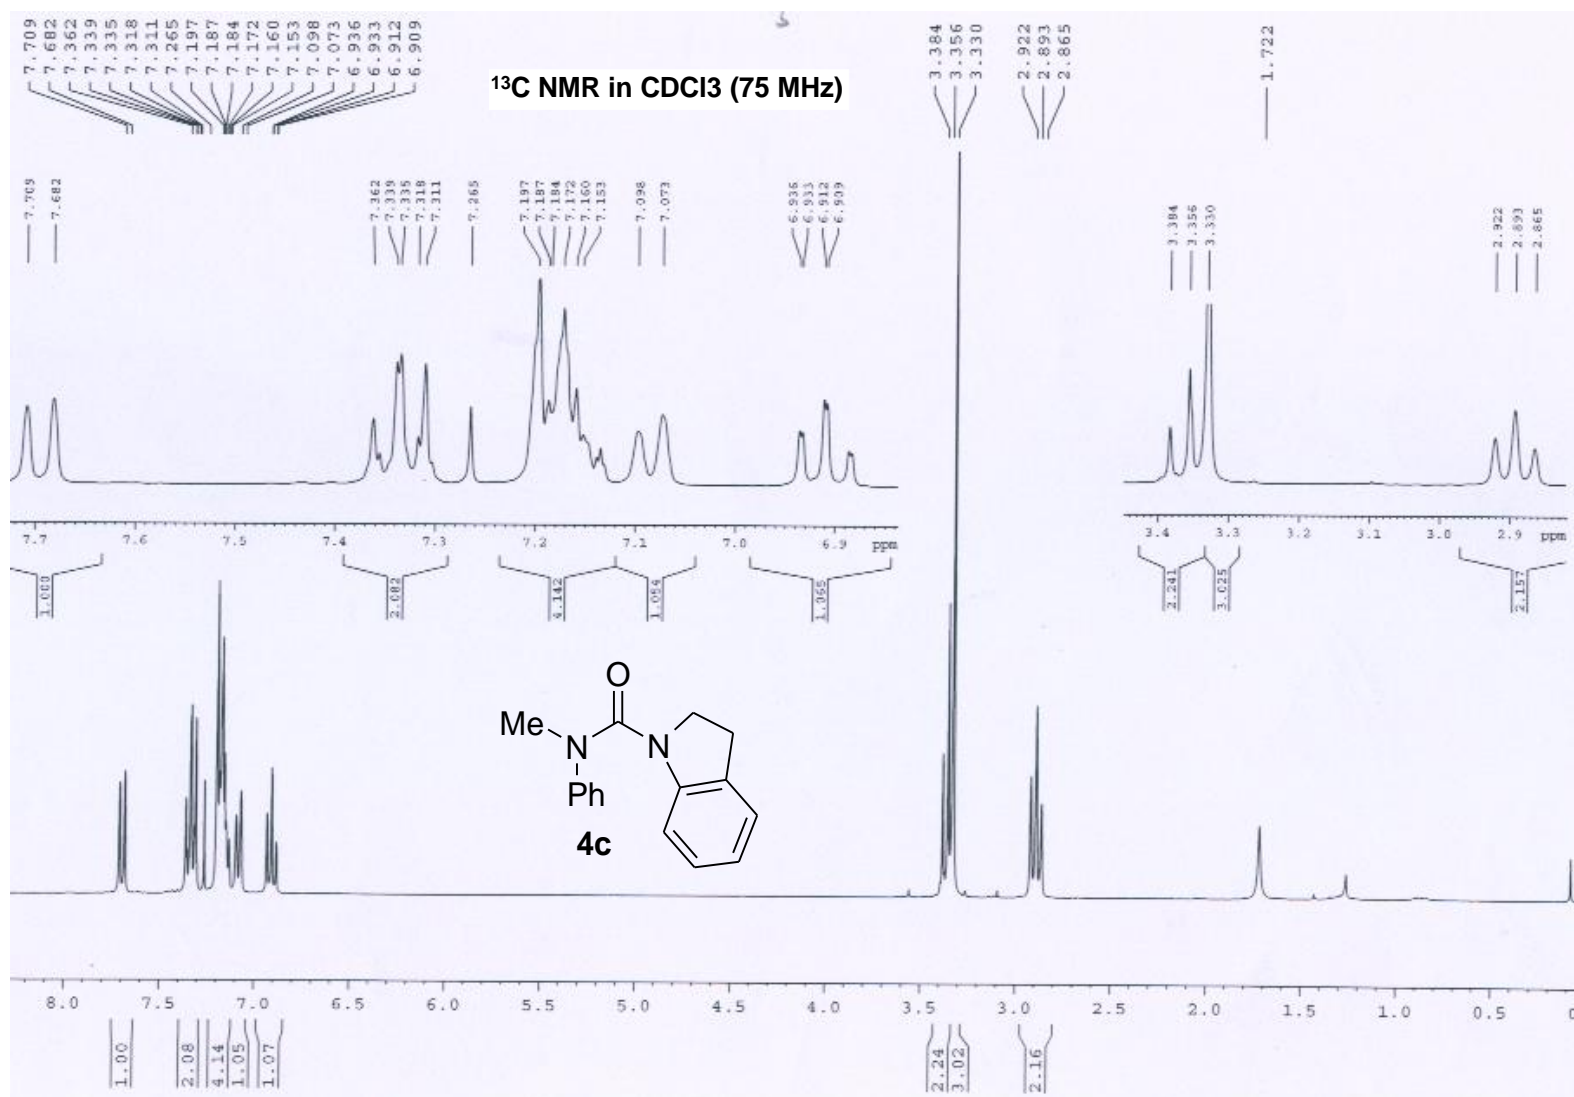

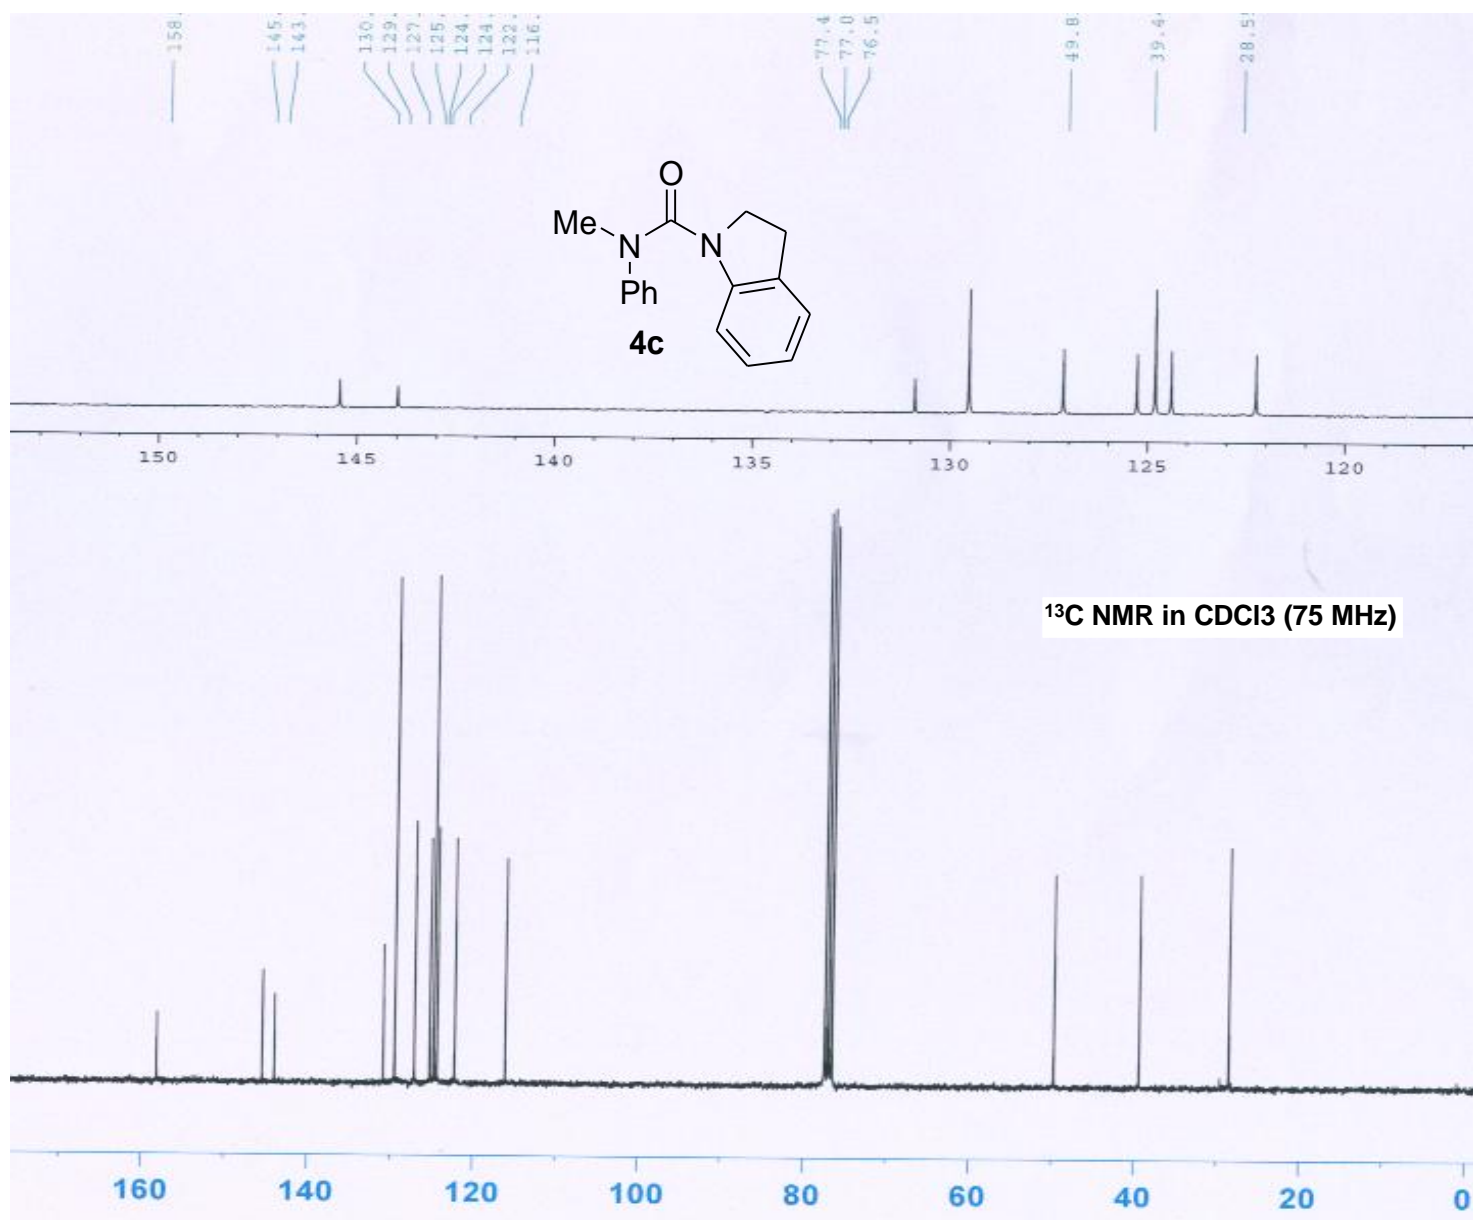

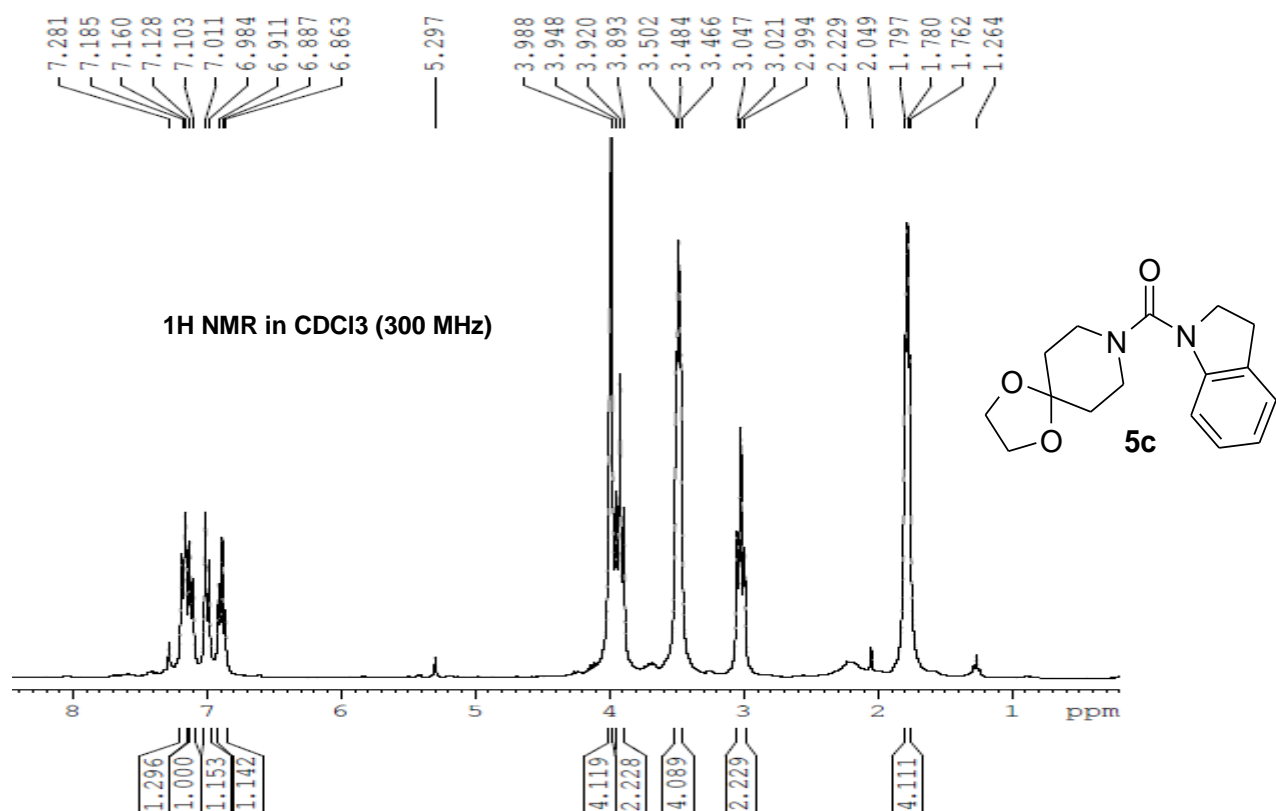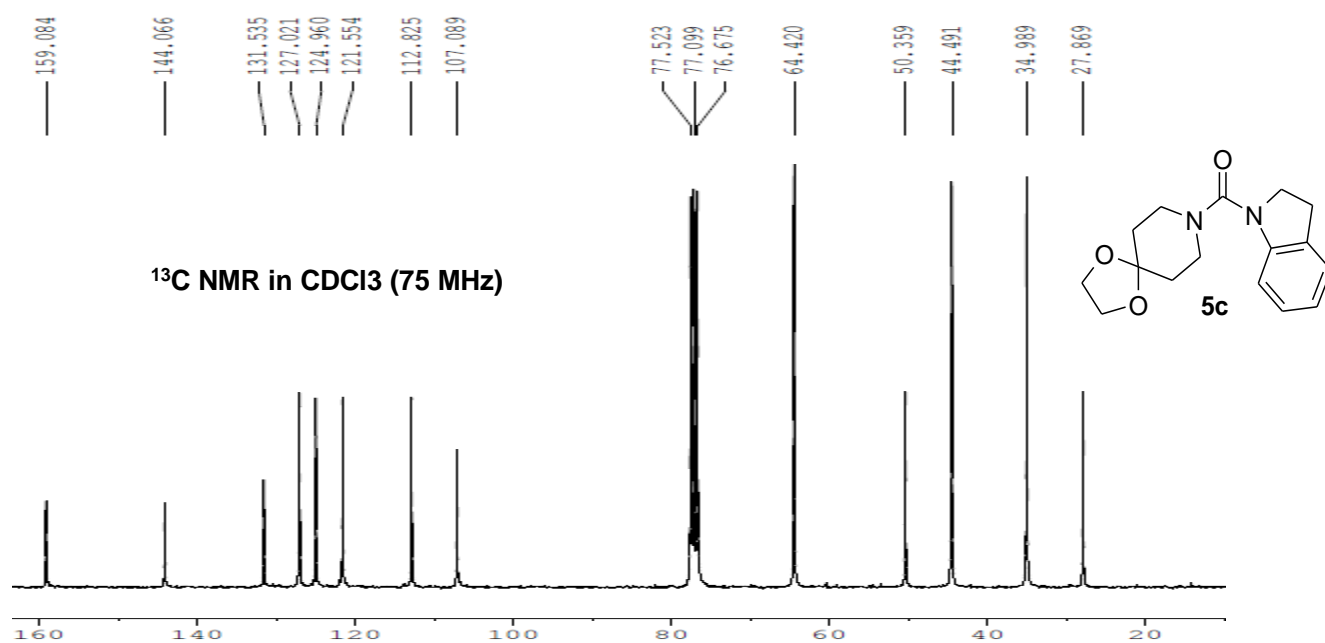



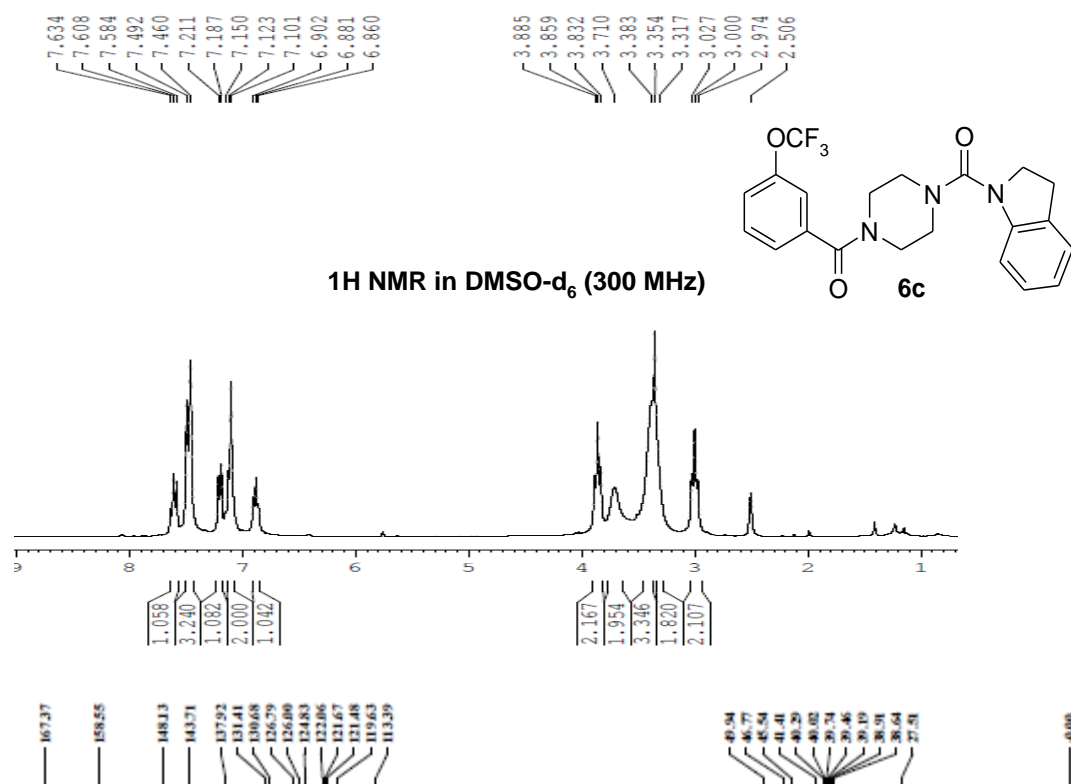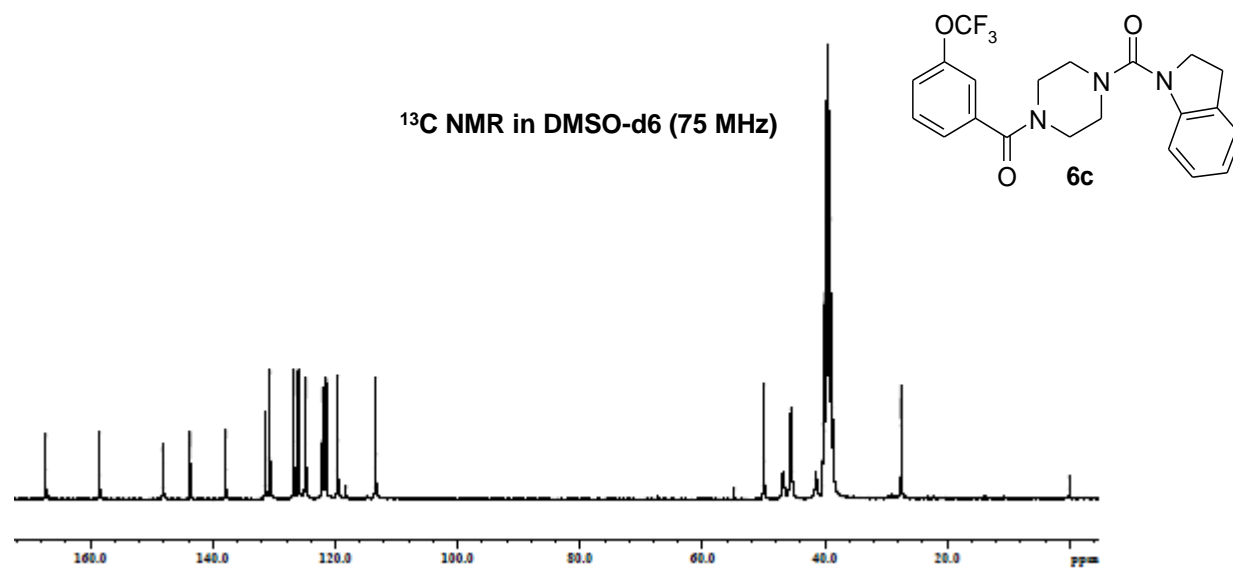

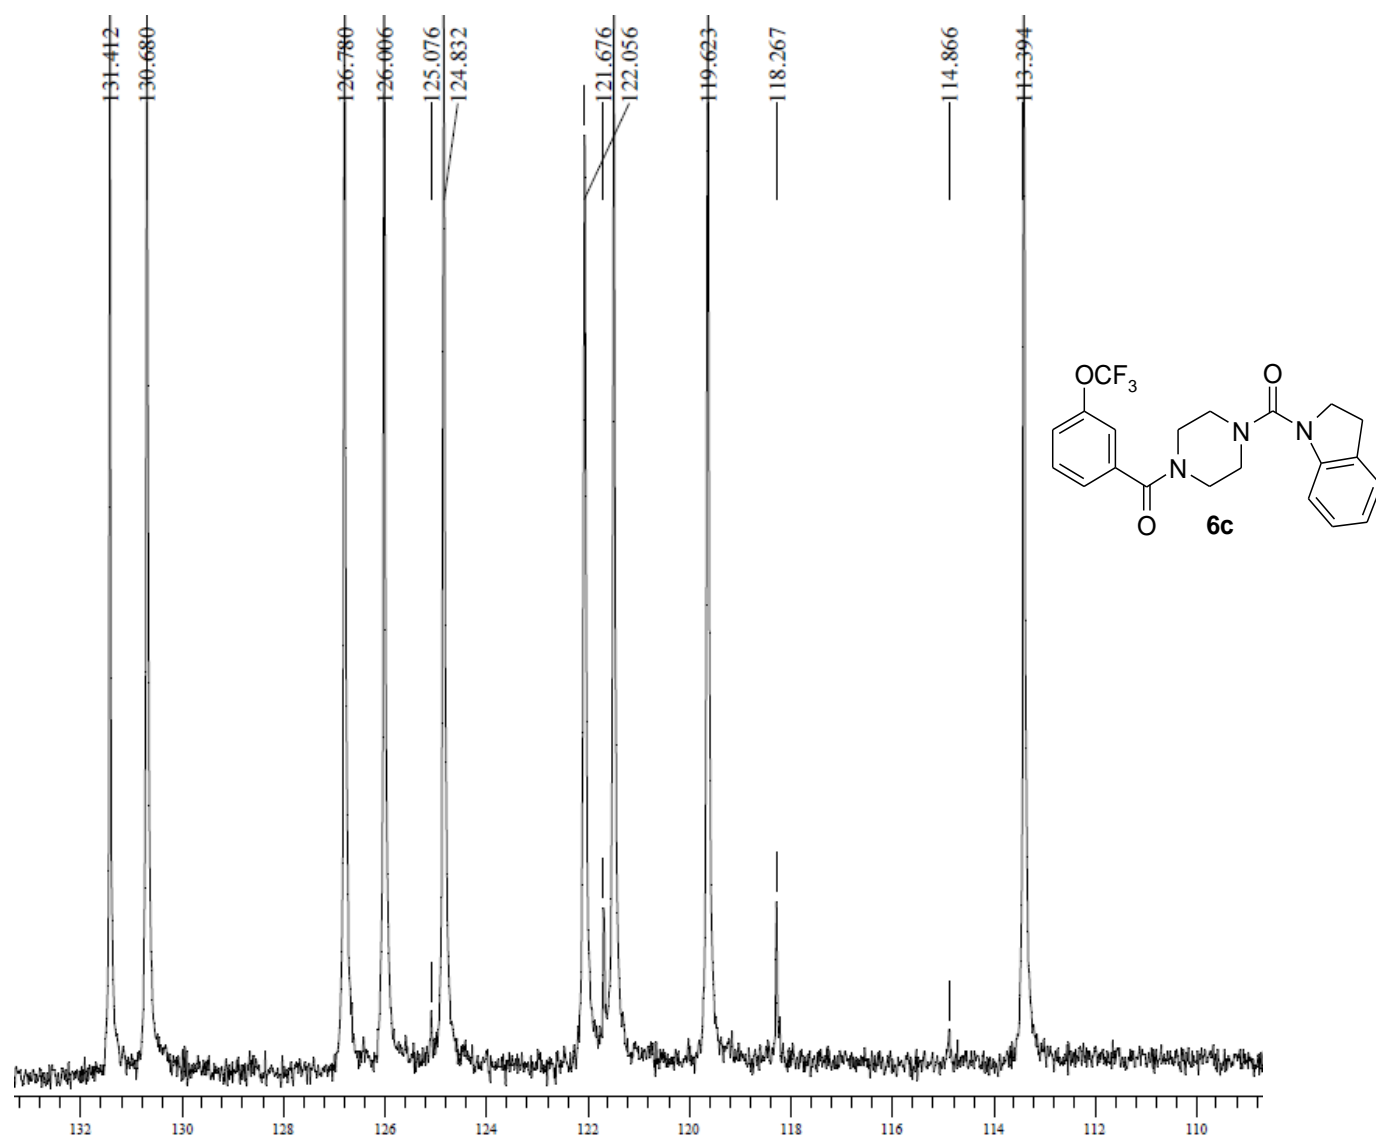

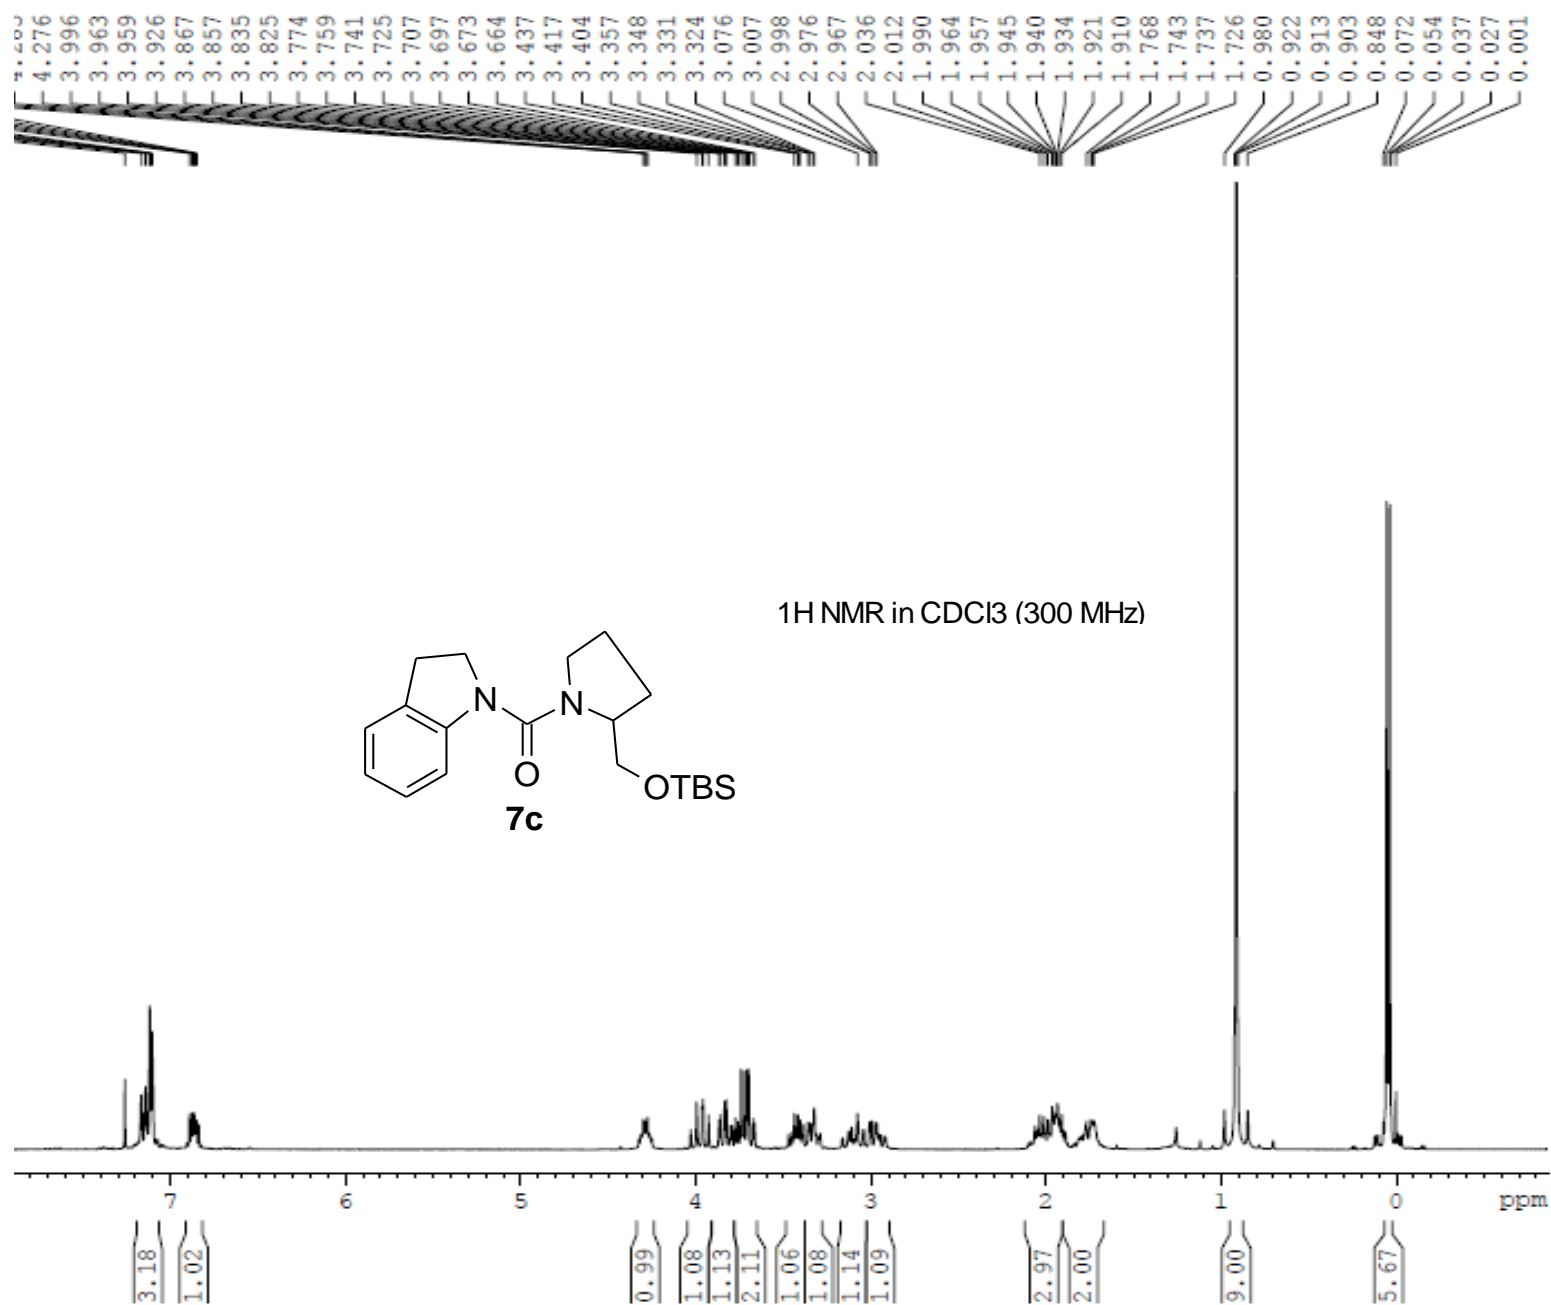

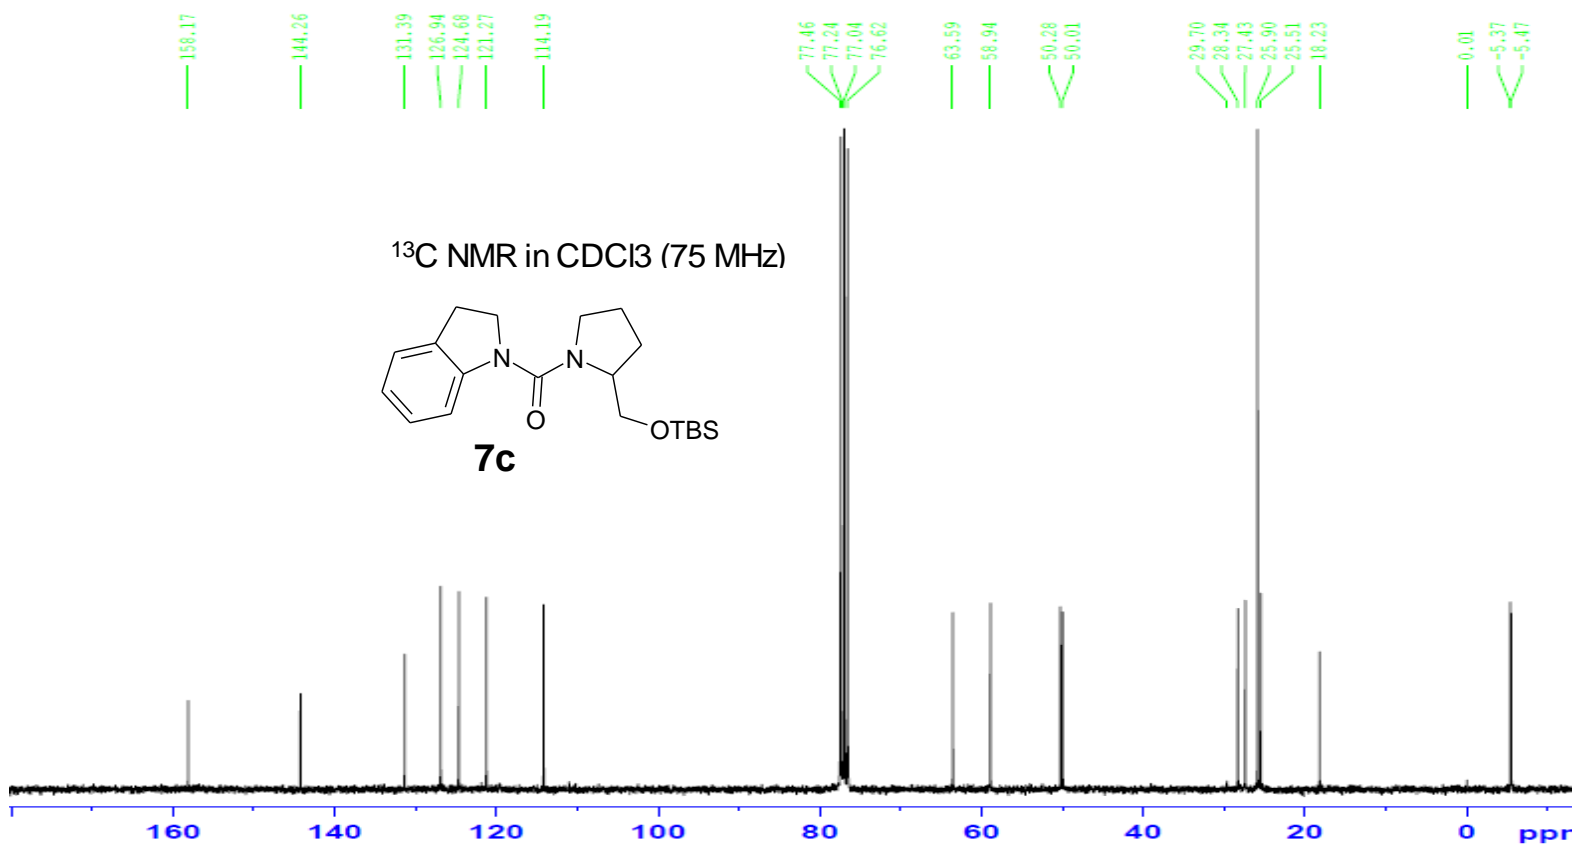

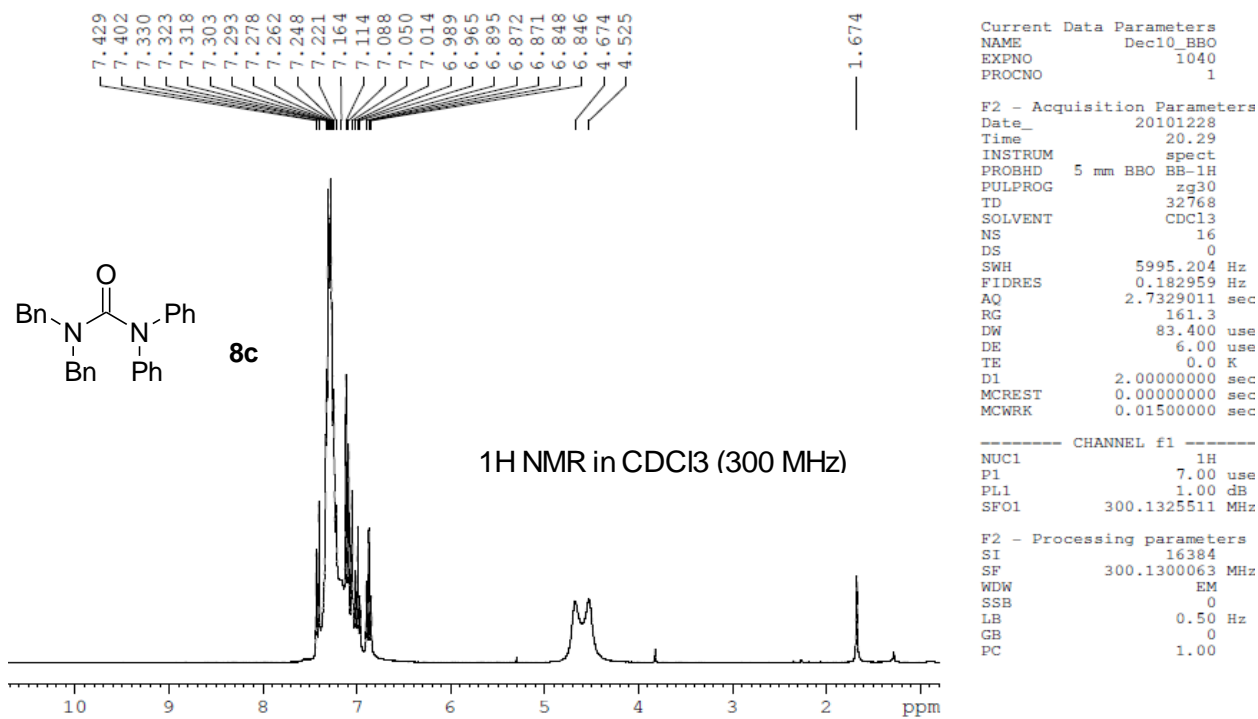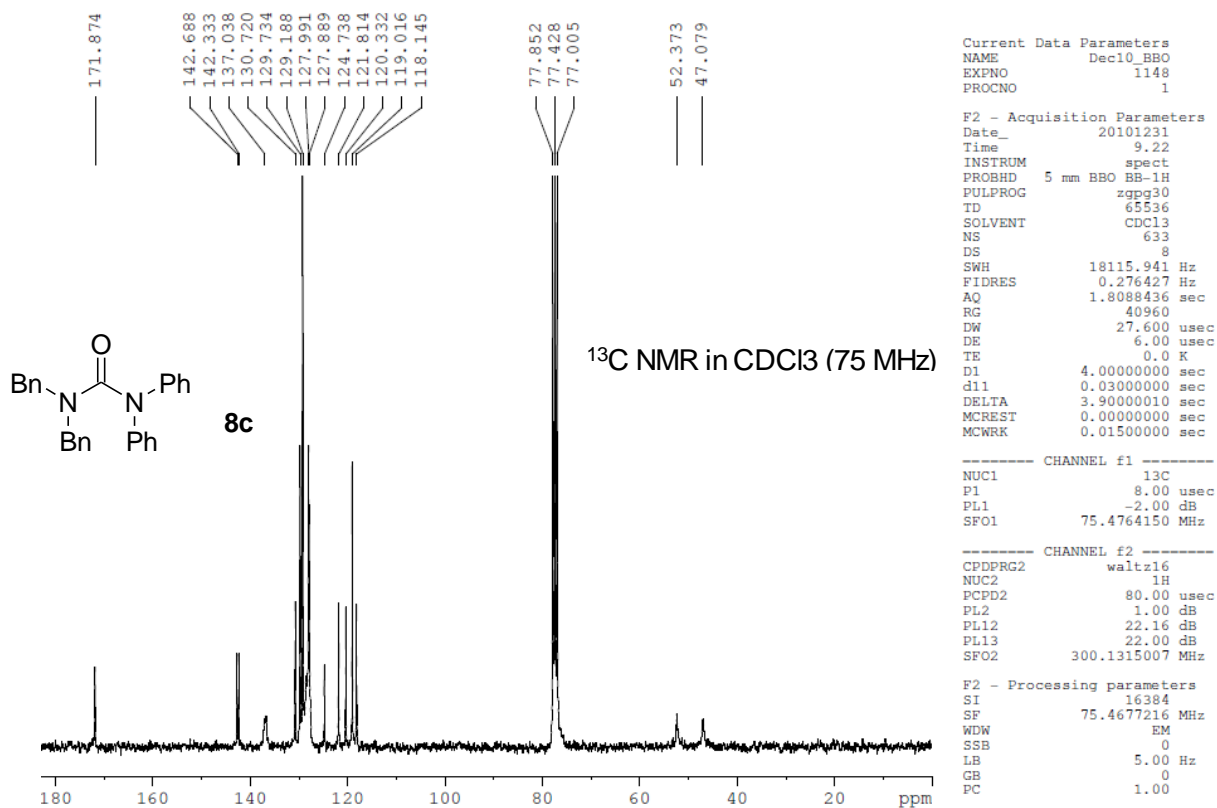

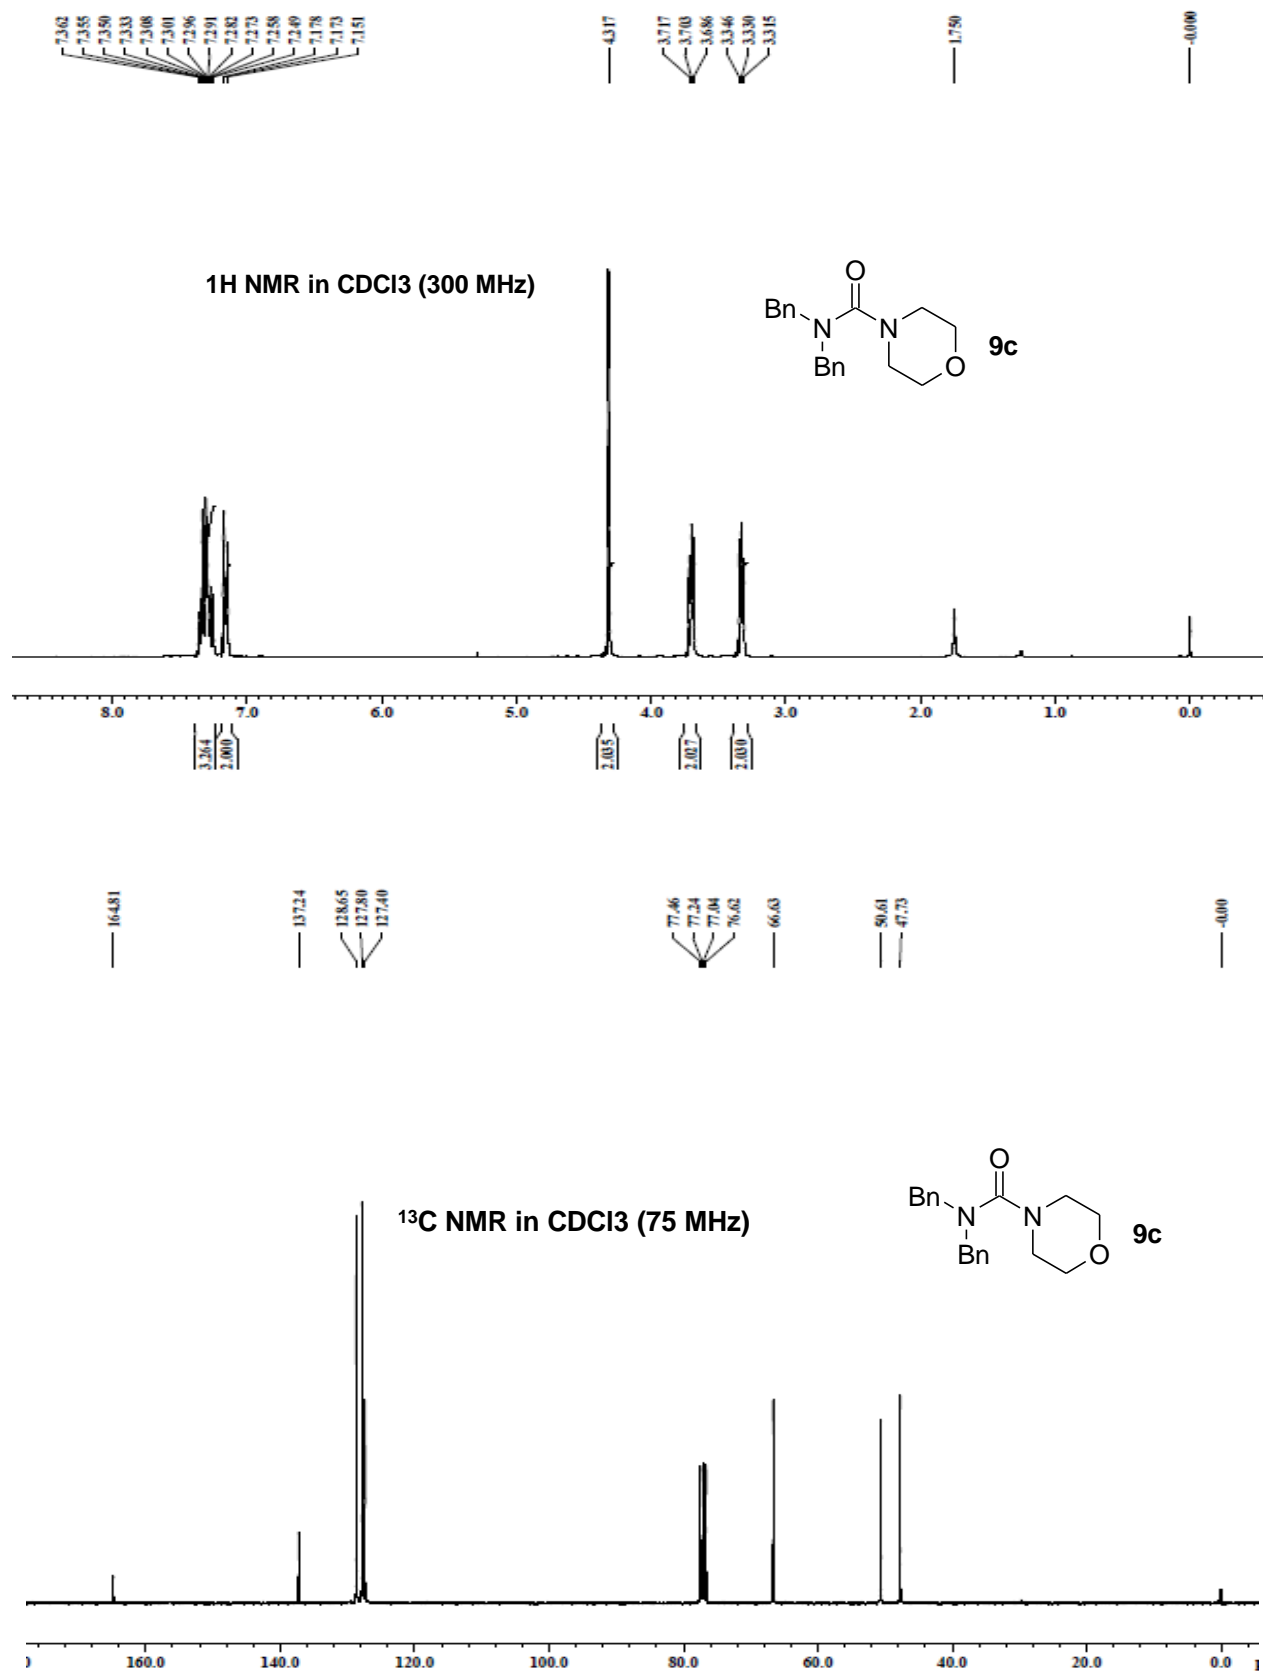

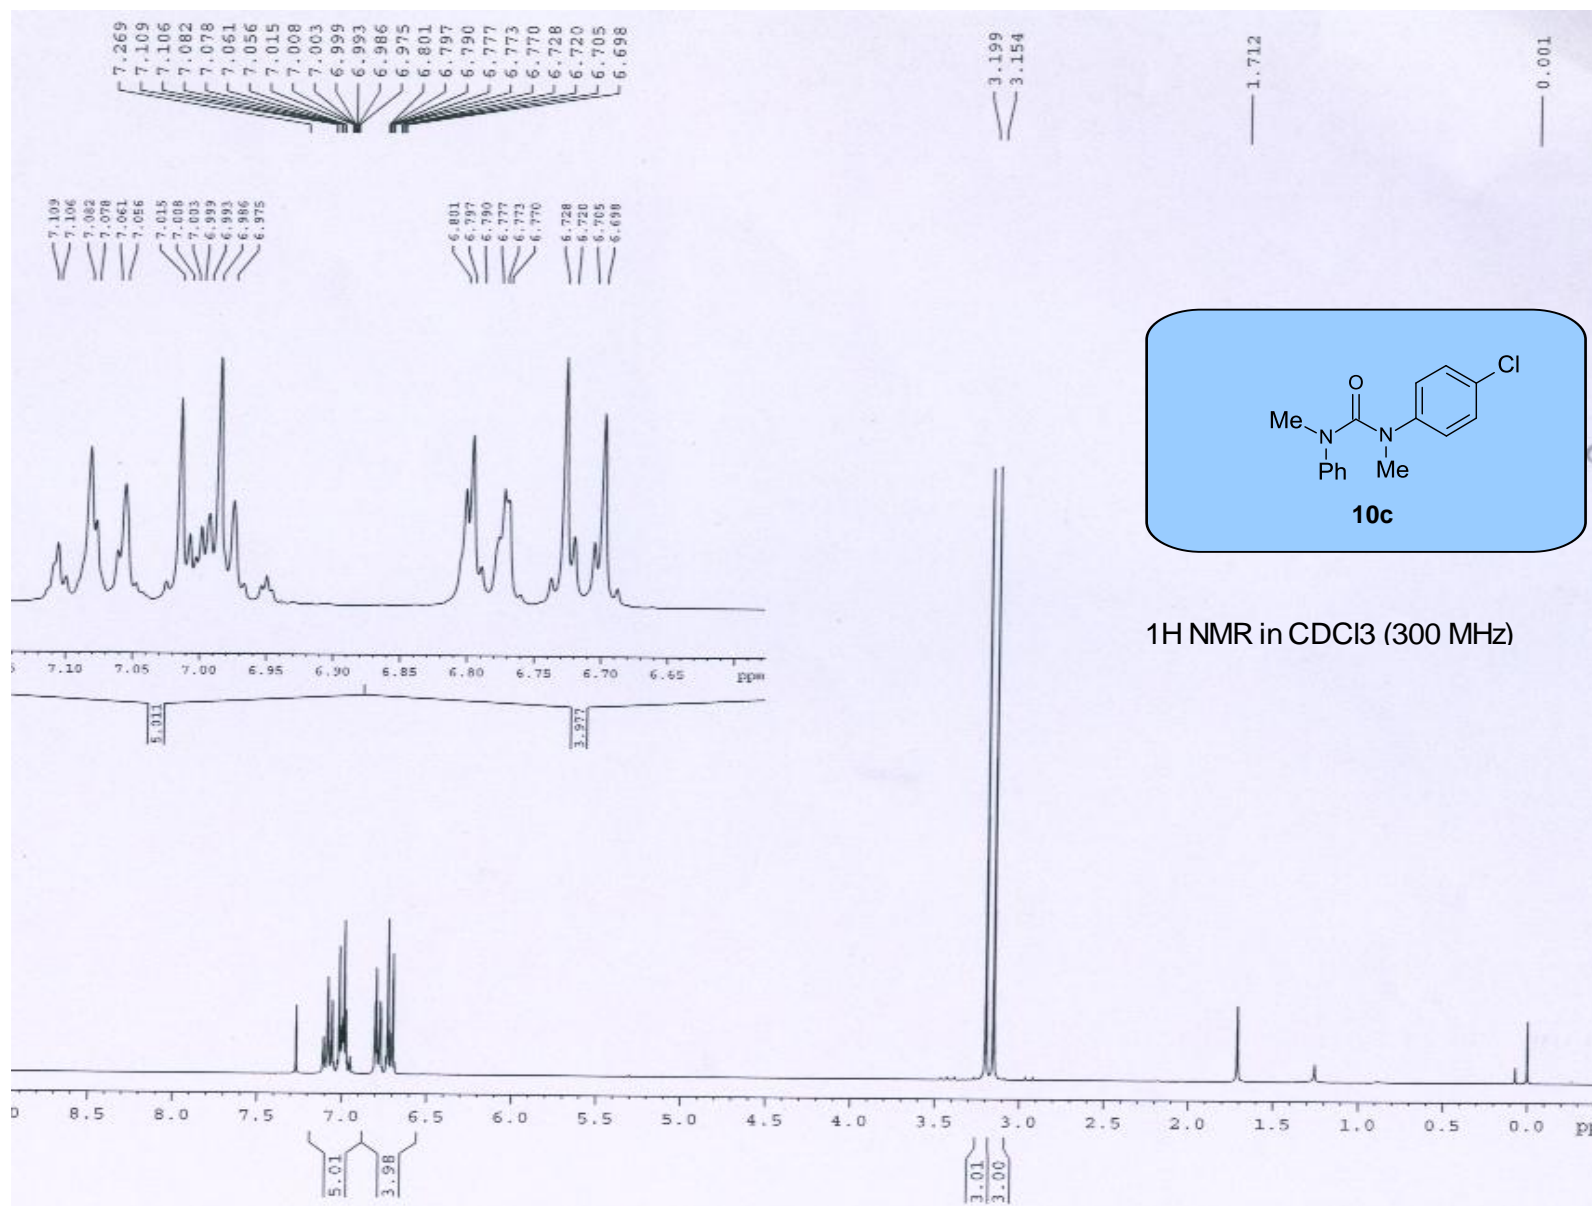

•

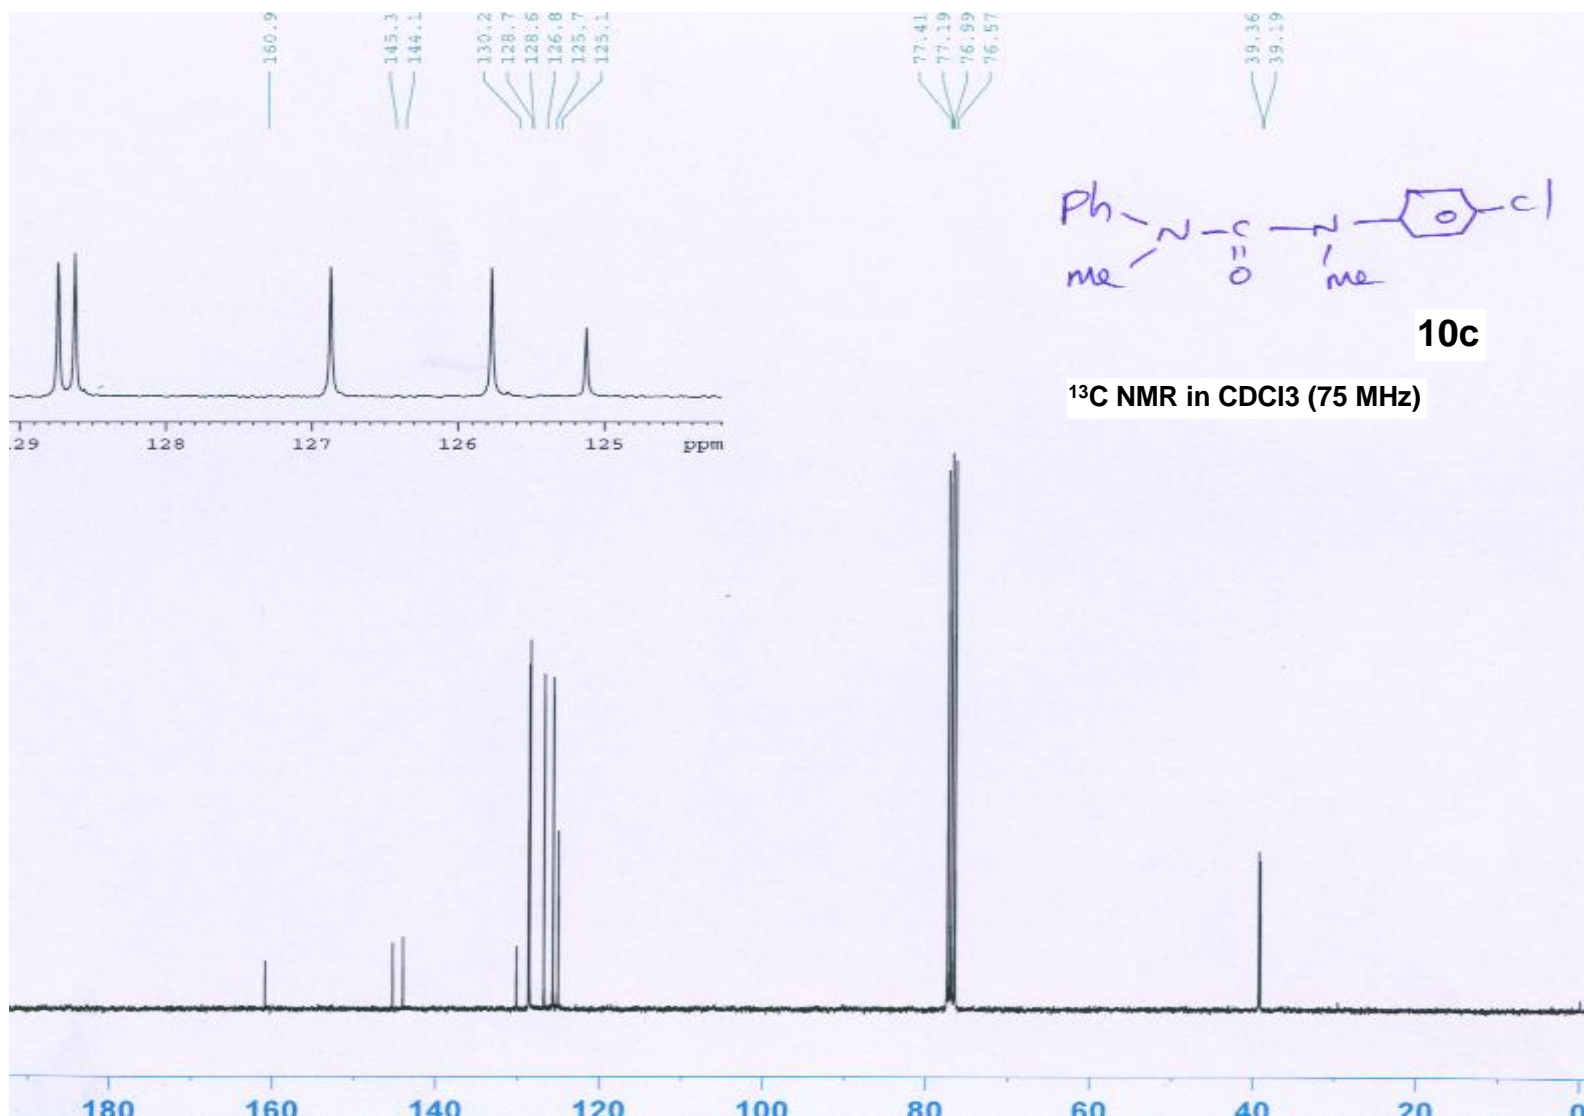



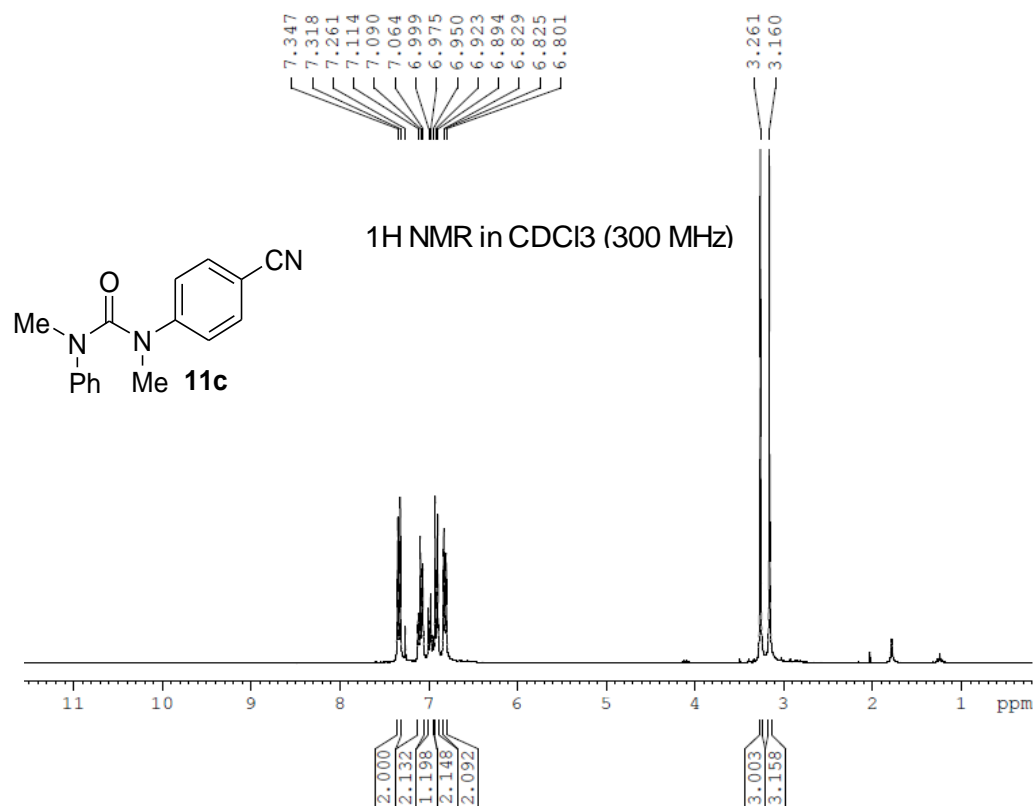

Current Data Parameters  
NAME Dec10\_BBO  
EXPNO 1041  
PROCNO 1

F2 - Acquisition Parameters  
Date\_ 20101228  
Time 20.34  
INSTRUM spect  
PROBHD 5 mm BBO BB-1H  
PULPROG zg30  
TD 32768  
SOLVENT CDCl3  
NS 16  
DS 0  
SWH 5995.204 Hz  
FIDRES 0.182959 Hz  
AQ 2.7329011 sec  
RG 143.7  
DW 83.400 usec  
DE 6.00 usec  
TE 0.0 K  
D1 2.00000000 sec  
MCREST 0.00000000 sec  
MCWRK 0.01500000 sec

----- CHANNEL f1 -----  
NUC1 1H  
P1 7.00 usec  
PL1 1.00 dB  
SFO1 300.1325511 MHz

F2 - Processing parameters  
SI 16384  
SF 300.1300063 MHz  
WDW EM  
SSB 0  
LB 0.50 Hz  
GB 0  
PC 1.00

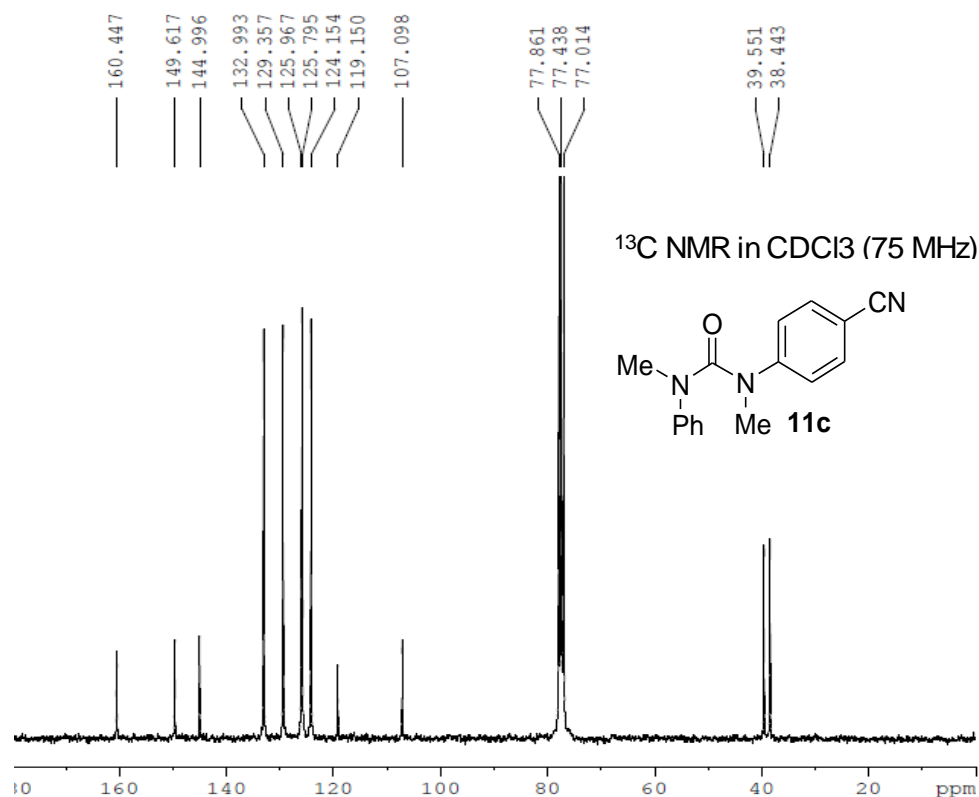

Current Data Parameters  
NAME Dec10\_BBO  
EXPNO 1174  
PROCNO 1

F2 - Acquisition Parameters  
Date\_ 20101231  
Time 14.48  
INSTRUM spect  
PROBHD 5 mm BBO BB-1H  
PULPROG zgpg30  
TD 65536  
SOLVENT CDCl3  
NS 1312  
DS 8  
SWH 18115.941 Hz  
FIDRES 0.276427 Hz  
AQ 1.8088436 sec  
RG 40960  
DW 27.600 usec  
DE 6.00 usec  
TE 0.0 K  
D1 4.00000000 sec  
d11 0.03000000 sec  
DELTA 3.90000010 sec  
MCREST 0.00000000 sec  
MCWRK 0.01500000 sec

----- CHANNEL f1 -----  
NUC1 13C  
P1 8.00 usec  
PL1 -2.00 dB  
SFO1 75.4764150 MHz

----- CHANNEL f2 -----  
CPDPRG2 waltz16  
NUC2 1H  
PCPD2 80.00 usec  
PL2 1.00 dB  
PL12 22.16 dB  
PL13 22.00 dB  
SFO2 300.1315007 MHz

F2 - Processing parameters  
SI 16384  
SF 75.4677216 MHz  
WDW EM  
SSB 0  
LB 5.00 Hz  
GB 0  
PC 1.00

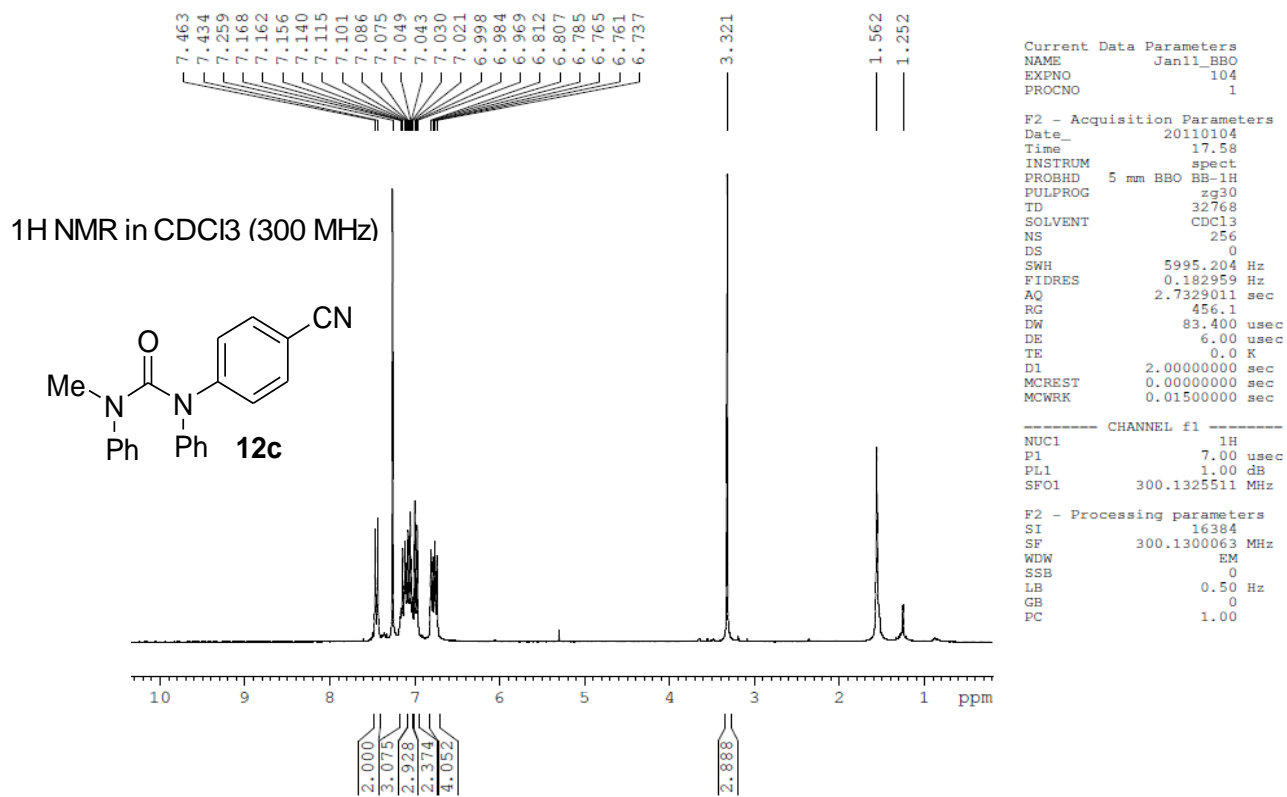

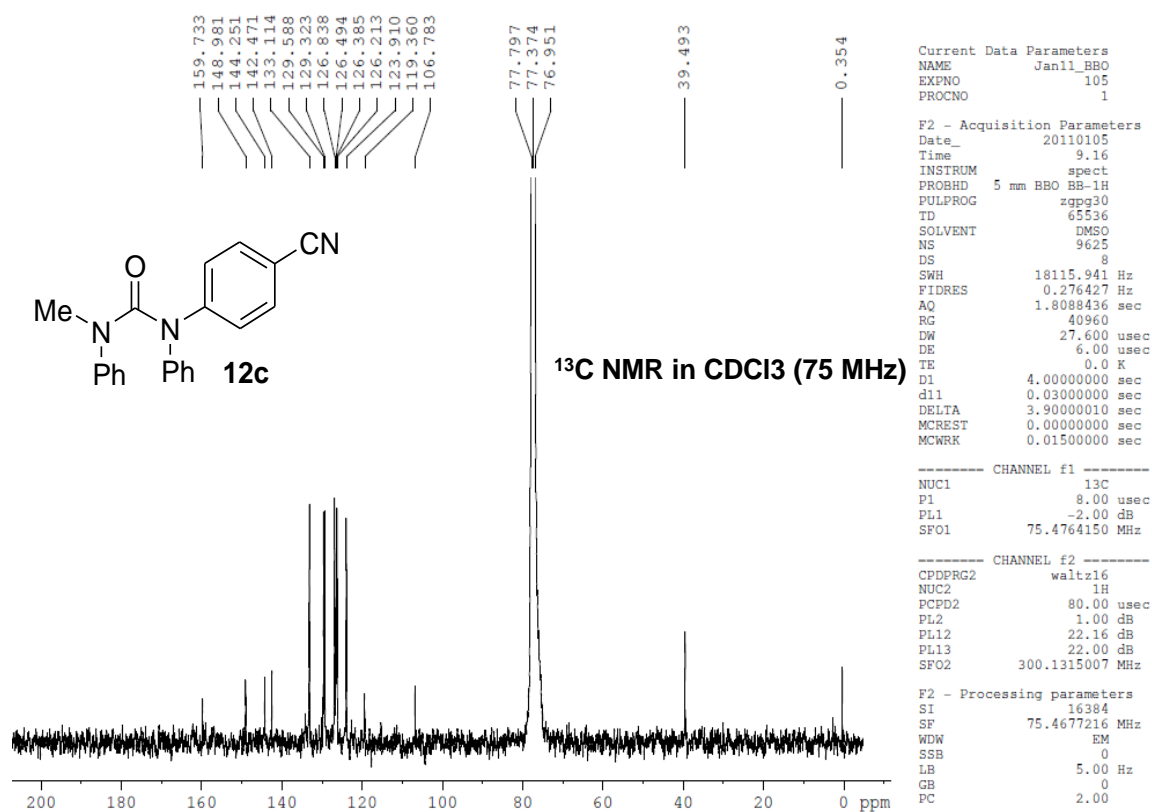

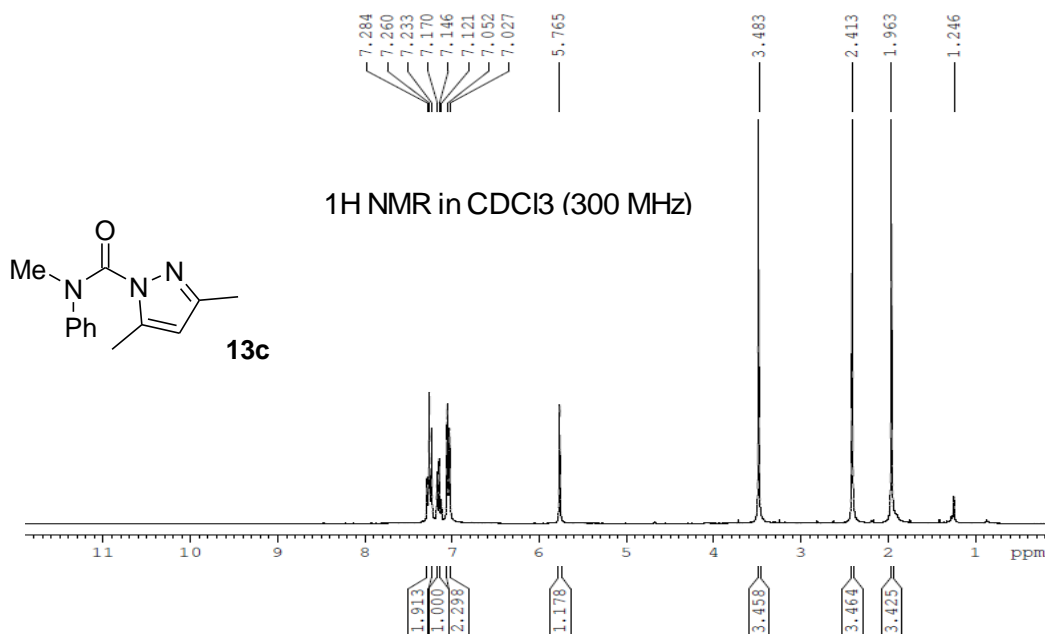

```
Current Data Parameters
NAME      Dec10_BBO
EXPNO     1038
PROCNO    1

F2 - Acquisition Parameters
Date_     20101228
Time      20.17
INSTRUM   spect
PROBHD    5 mm BBO BB-1H
PULPROG   zg30
TD         32768
SOLVENT   CDCl3
NS         16
DS         0
SWH        5995.204 Hz
FIDRES     0.182959 Hz
AQ         2.7329011 sec
RG         114
DW         83.400 usec
DE         6.00 usec
TE         0.0 K
D1         2.00000000 sec
MCREST     0.00000000 sec
MCWRK     0.01500000 sec

----- CHANNEL f1 -----
NUC1       1H
P1         7.00 usec
PL1        1.00 dB
SFO1       300.1325511 MHz

F2 - Processing parameters
SI         16384
SF         300.1300063 MHz
WDW        EM
SSB        0
LB         0.50 Hz
GB         0
PC         1.00
```

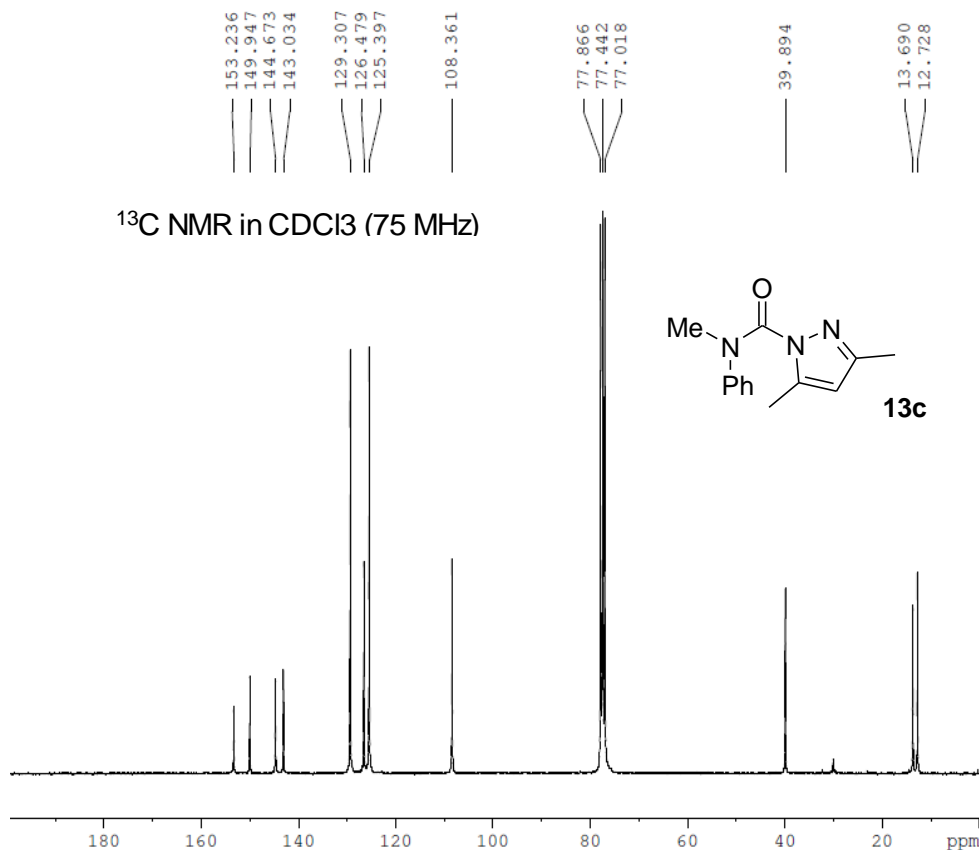

```
Current Data Parameters
NAME      Dec10_BBO
EXPNO     1088
PROCNO    1

F2 - Acquisition Parameters
Date_     20101229
Time      17.24
INSTRUM   spect
PROBHD    5 mm BBO BB-1H
PULPROG   zgpg30
TD         65536
SOLVENT   CDCl3
NS         9699
DS         8
SWH        18115.941 Hz
FIDRES     0.276427 Hz
AQ         1.8088436 sec
RG         40960
DW         27.600 usec
DE         6.00 usec
TE         0.0 K
D1         4.00000000 sec
d11        0.03000000 sec
DELTA      3.90000010 sec
MCREST     0.00000000 sec
MCWRK     0.01500000 sec

----- CHANNEL f1 -----
NUC1       13C
P1         8.00 usec
PL1        -2.00 dB
SFO1       75.4764150 MHz

----- CHANNEL f2 -----
CPDPRG2    waltz16
NUC2       1H
PCPD2      80.00 usec
PL2        1.00 dB
PL12       22.16 dB
PL13       22.00 dB
SFO2       300.1315007 MHz

F2 - Processing parameters
SI         16384
SF         75.4677216 MHz
WDW        EM
SSB        0
LB         5.00 Hz
GB         0
PC         1.00
```

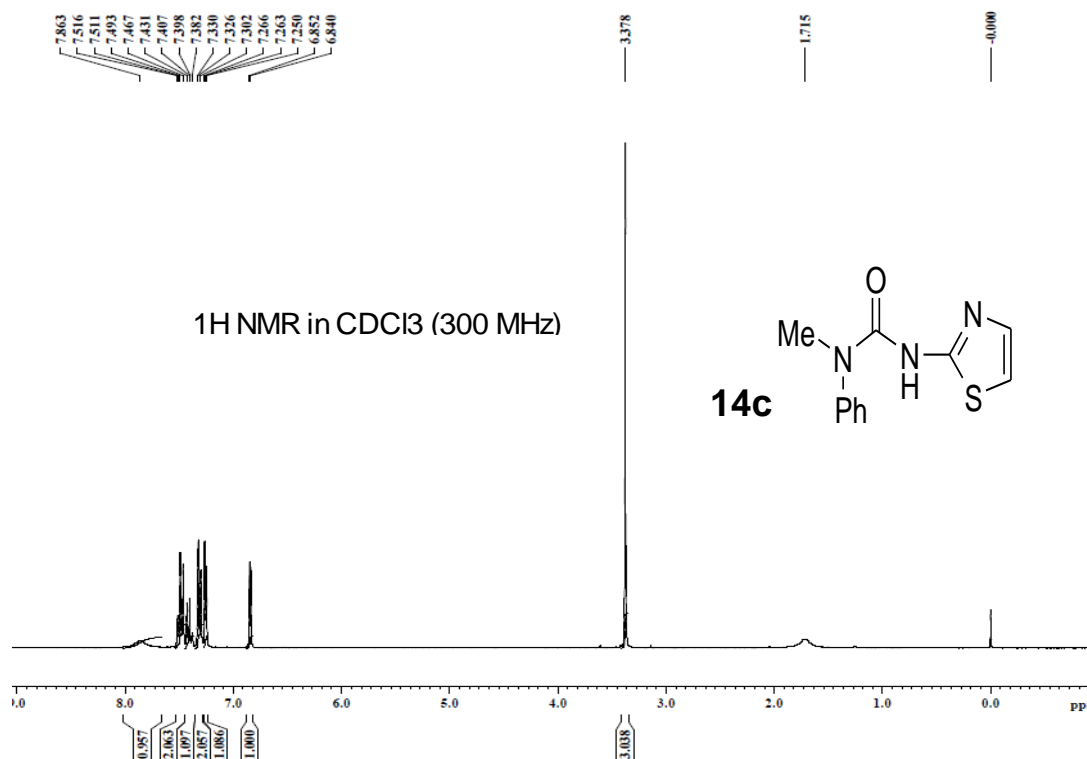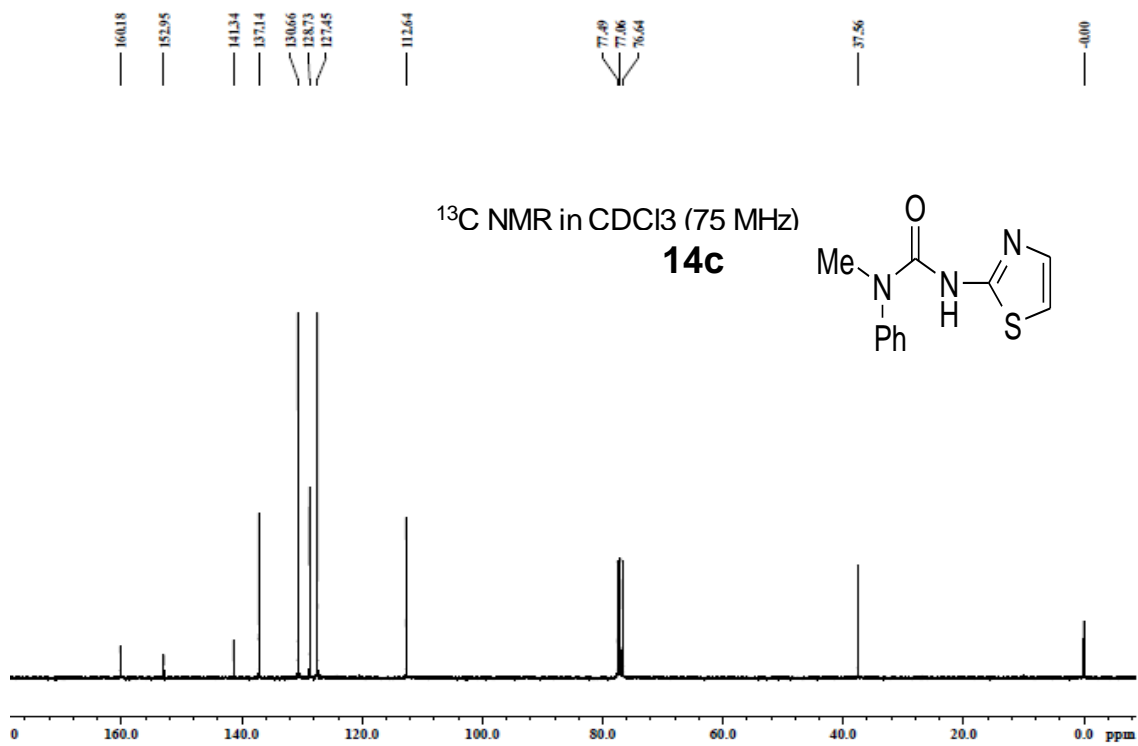

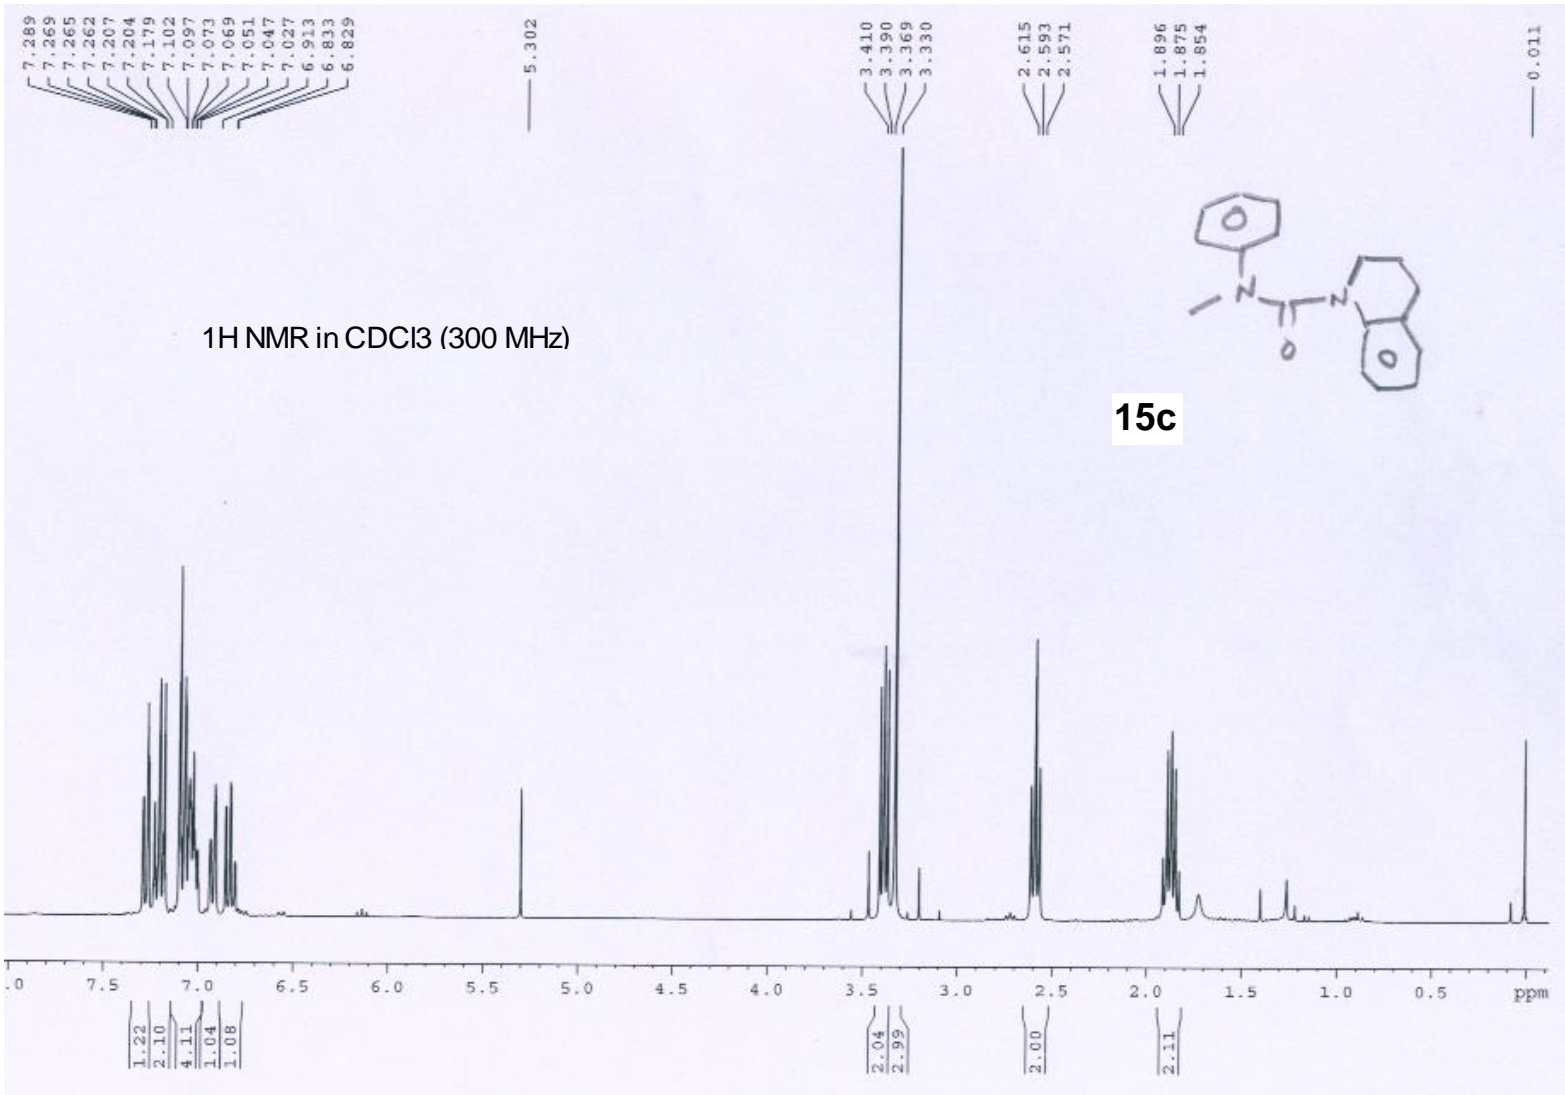

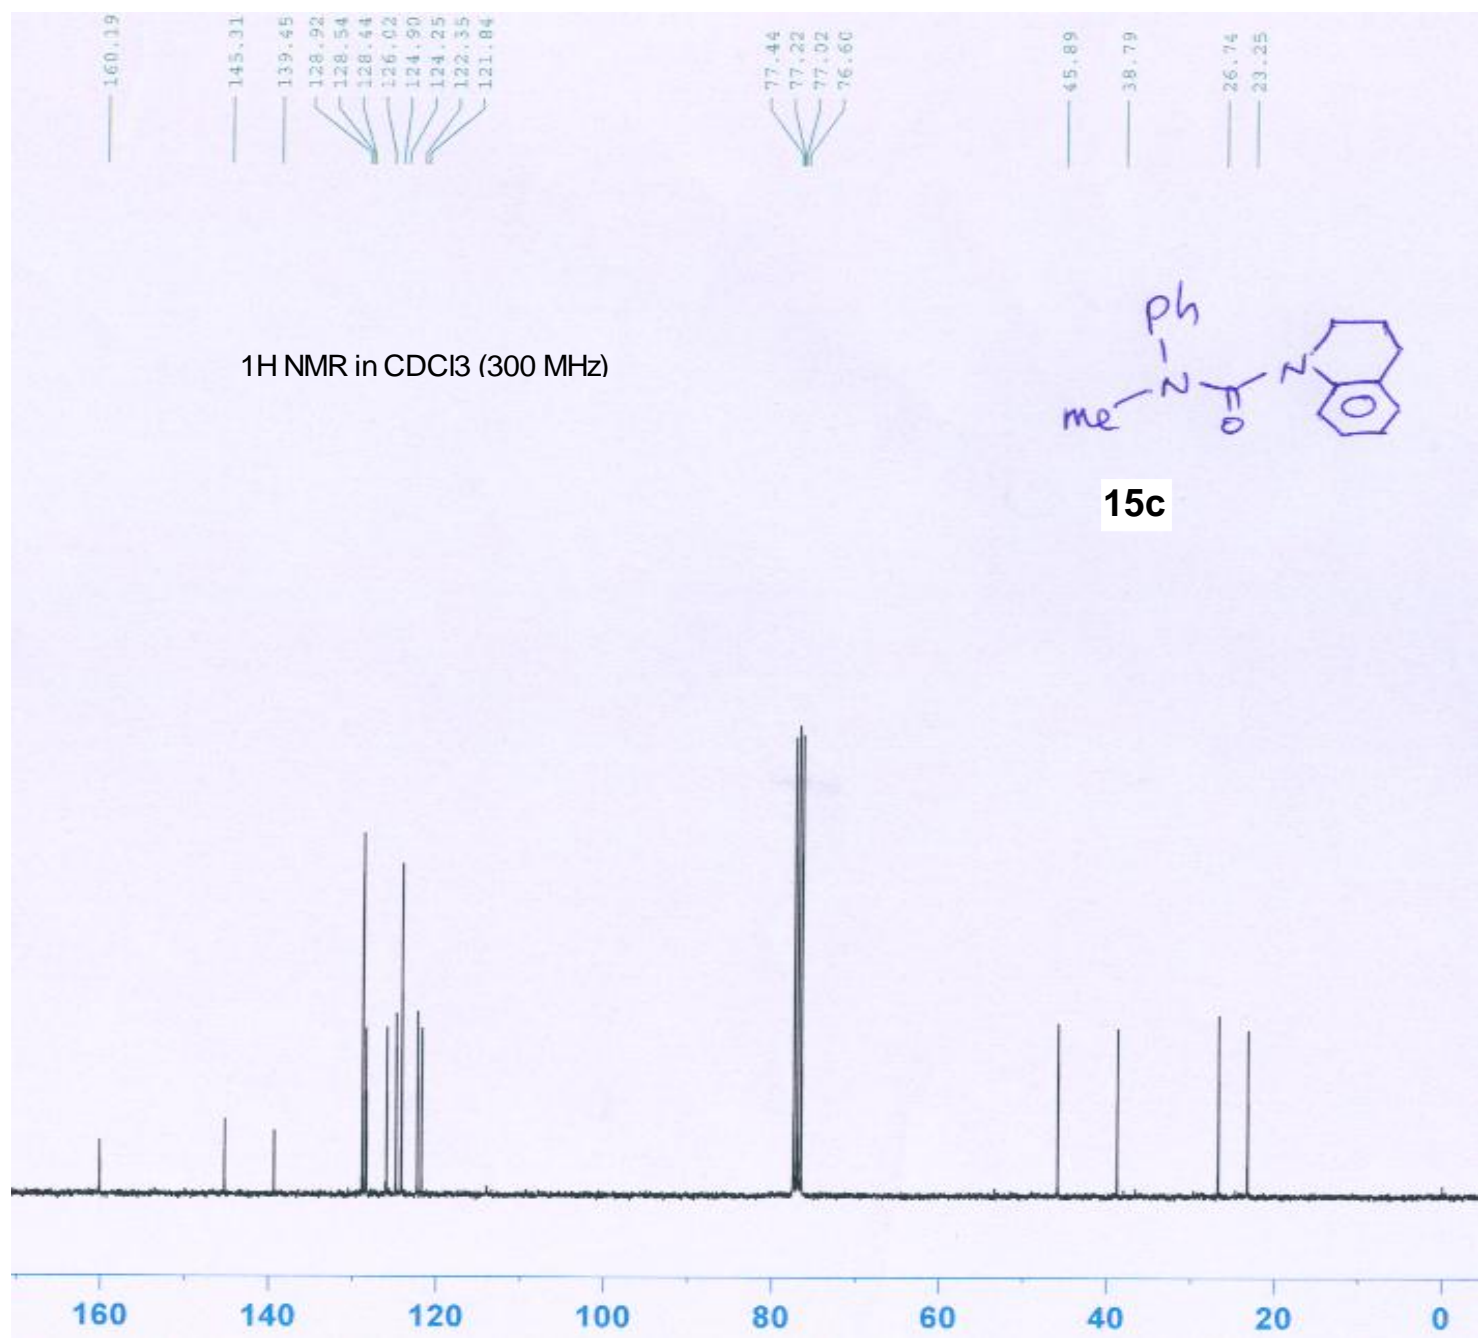

## Compound 16c

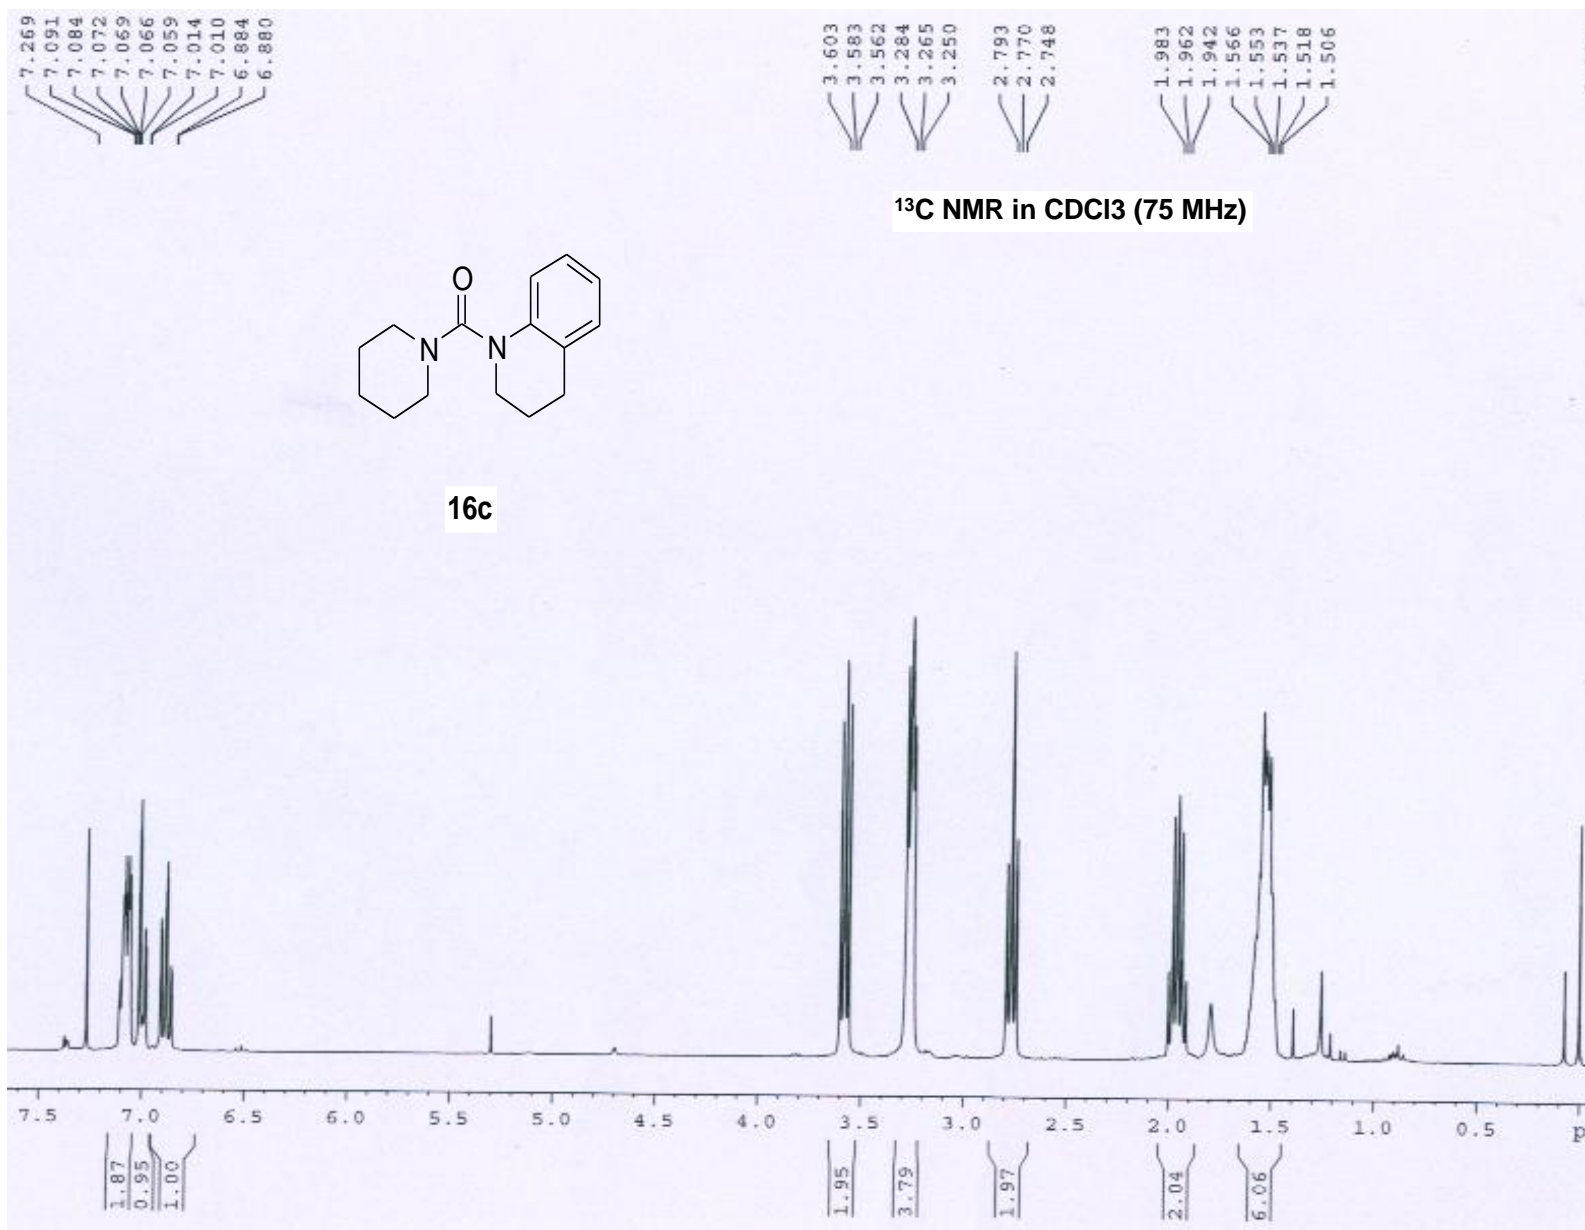



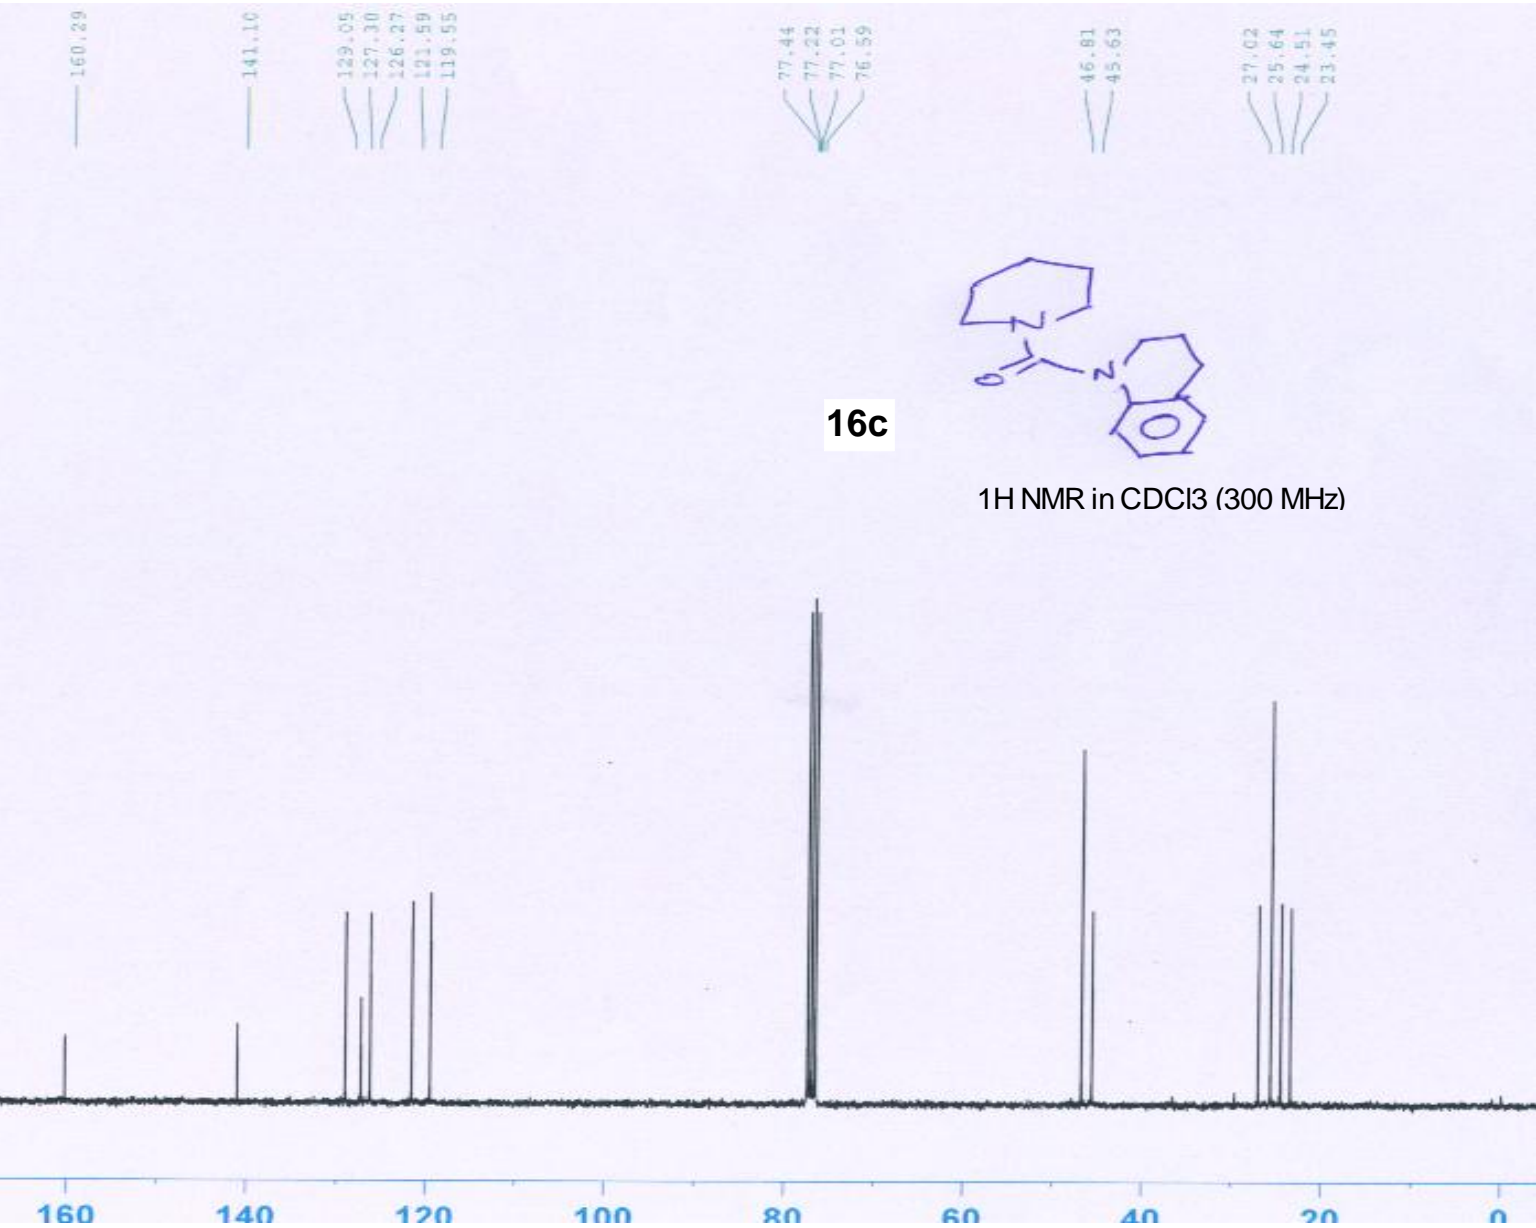

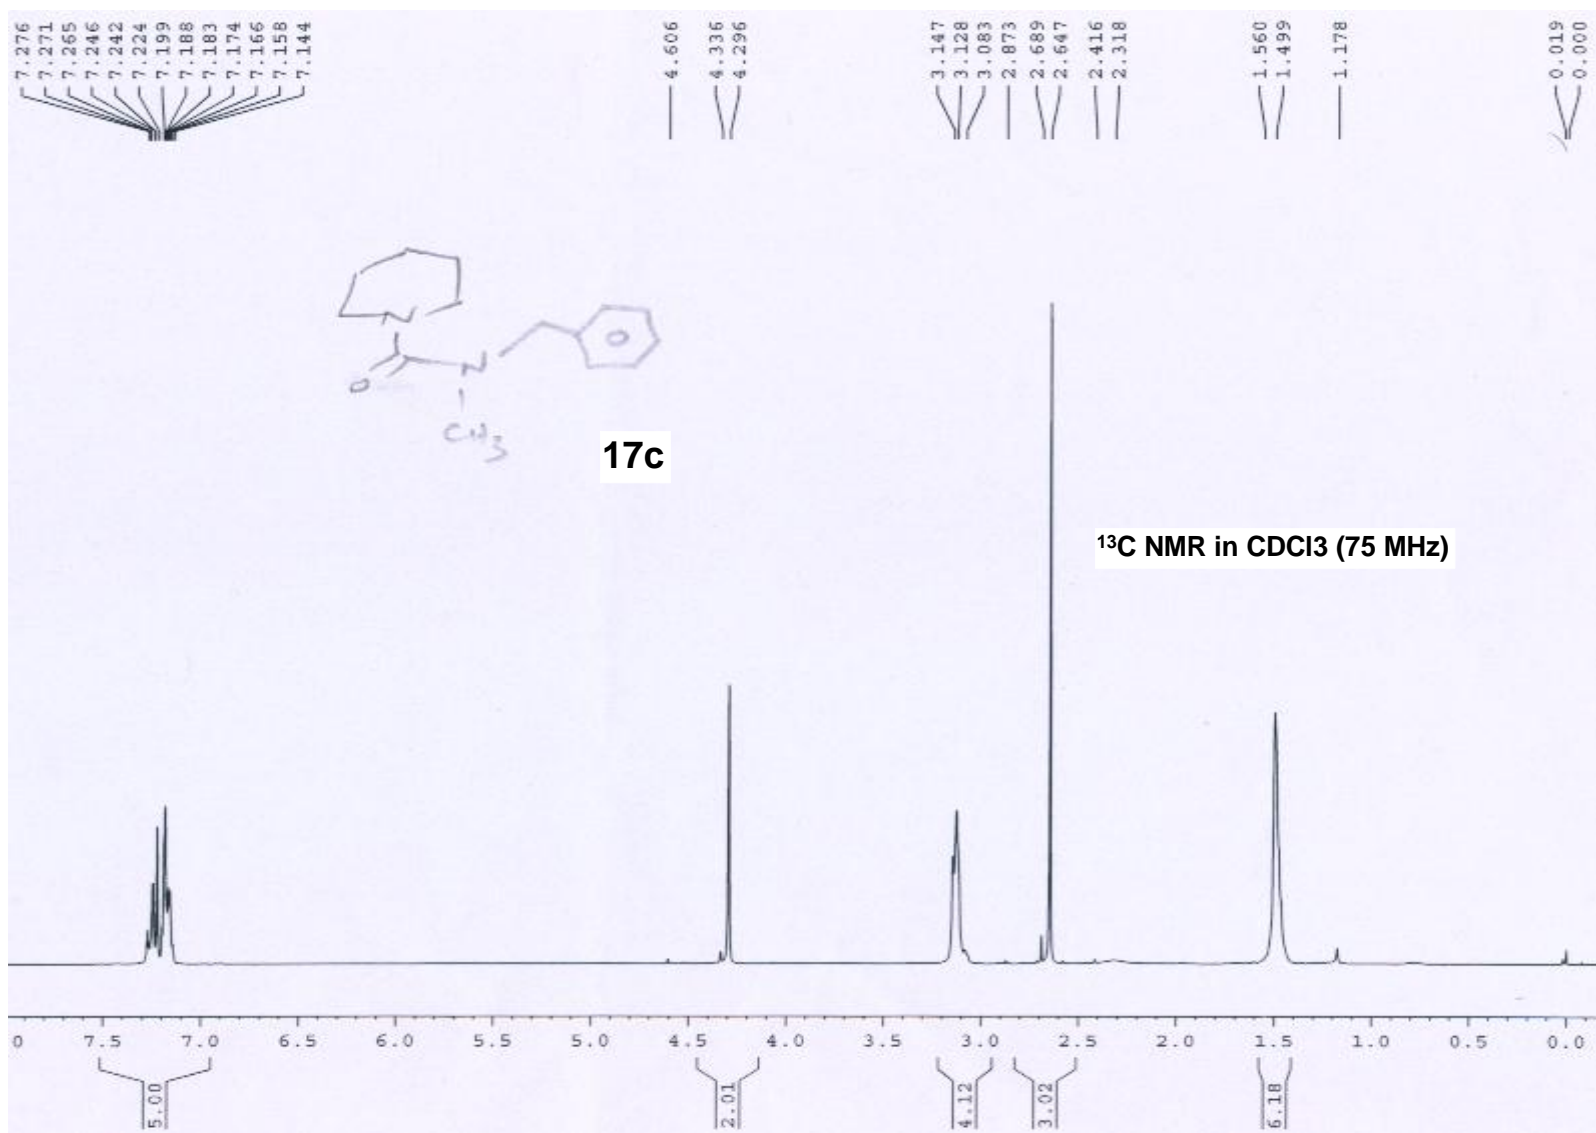

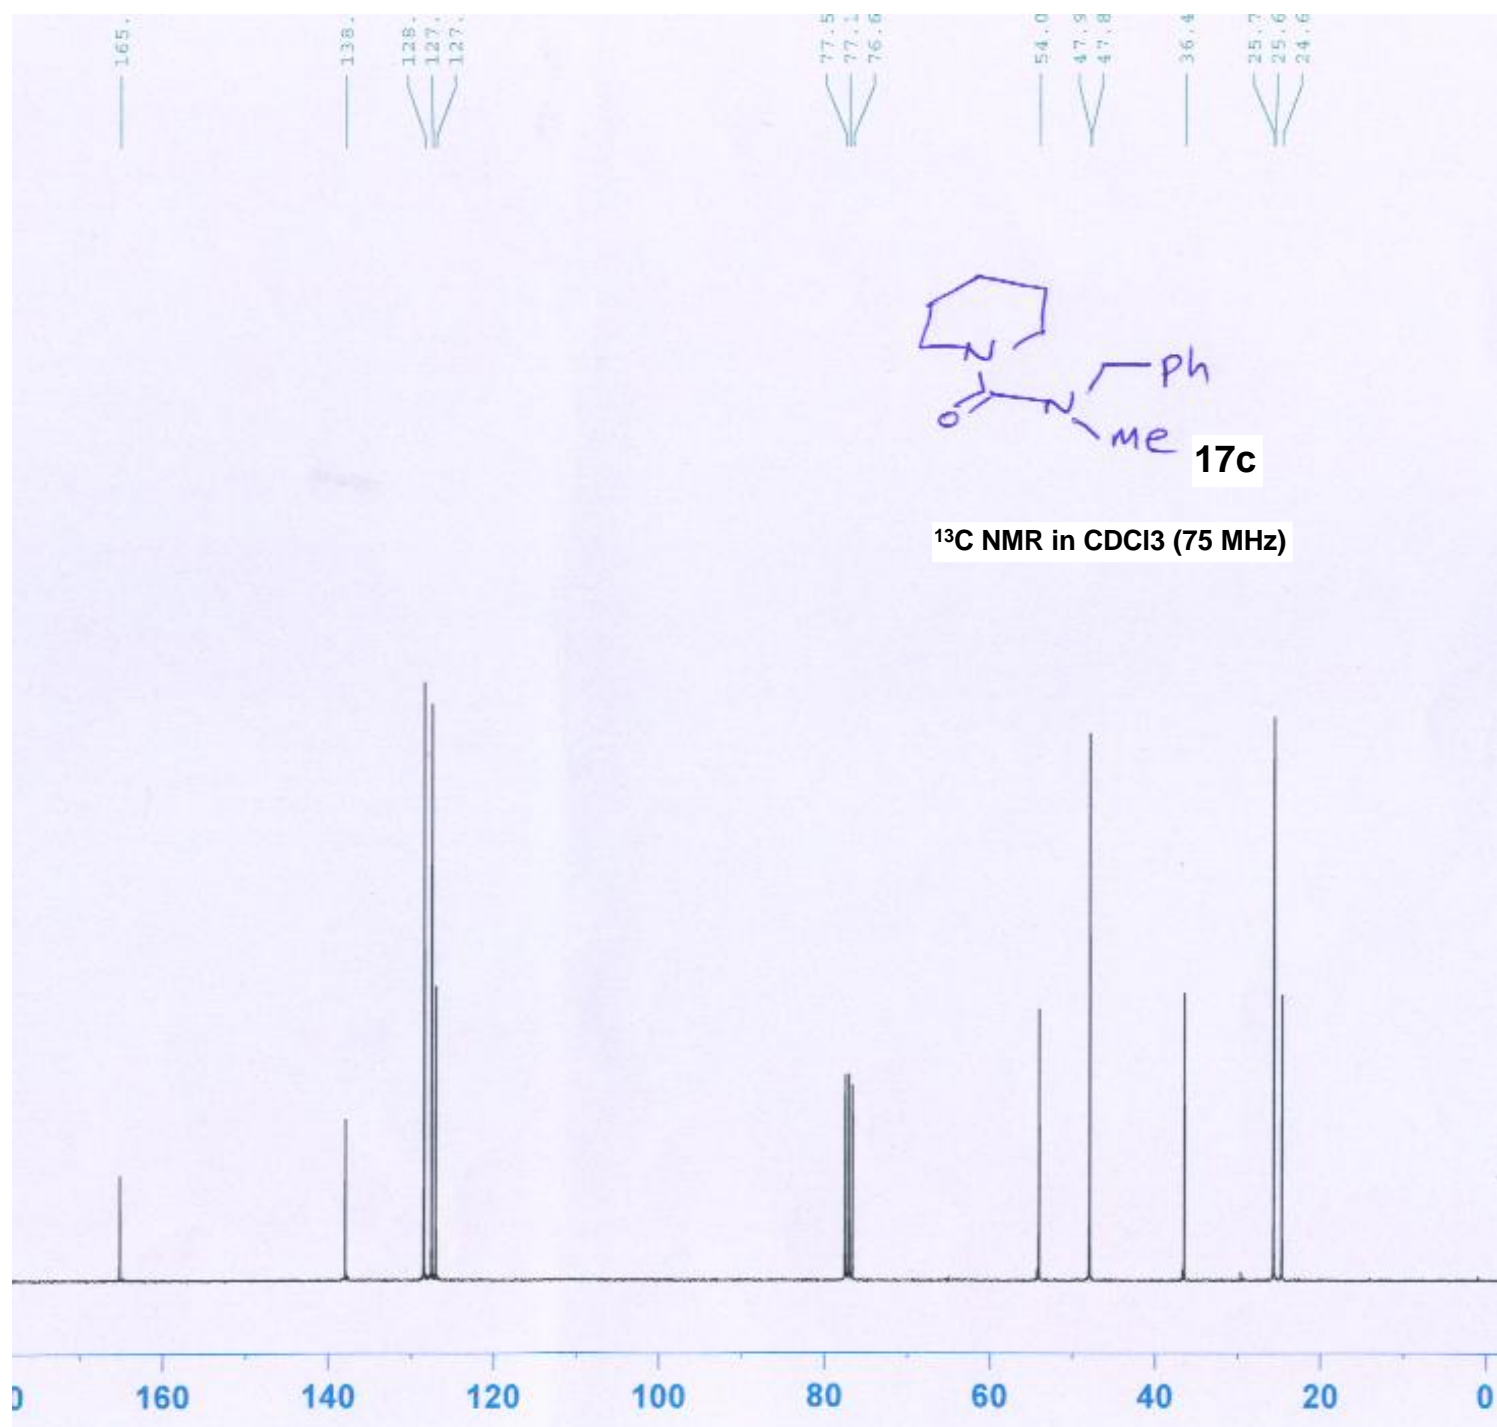

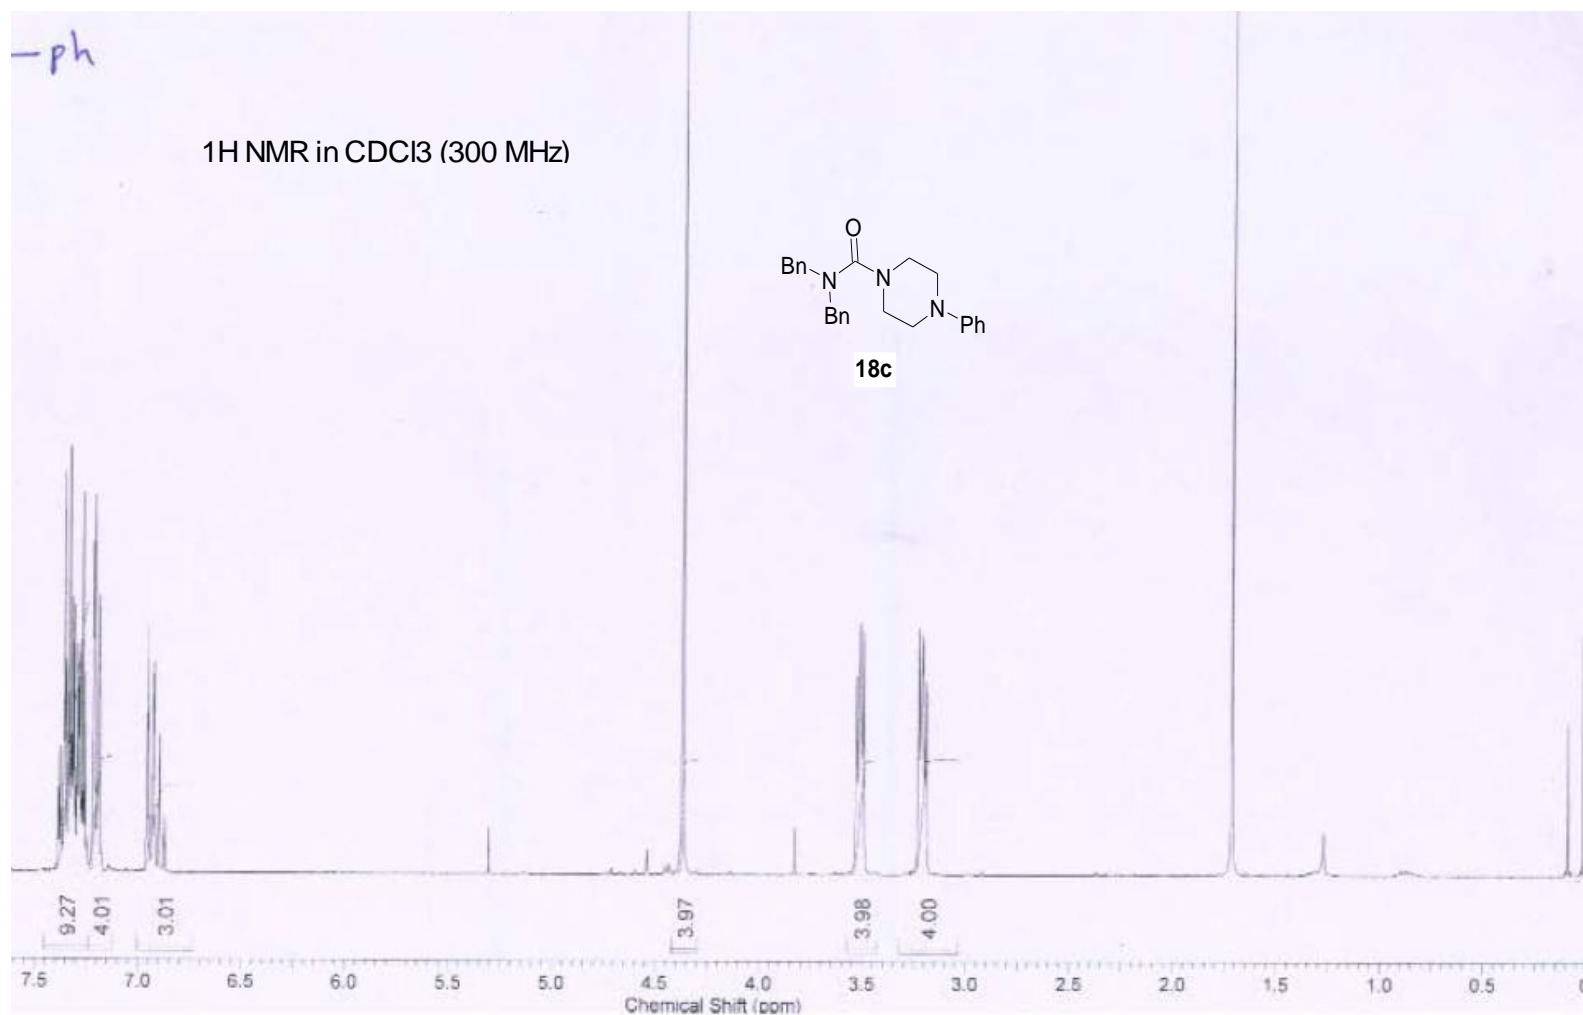

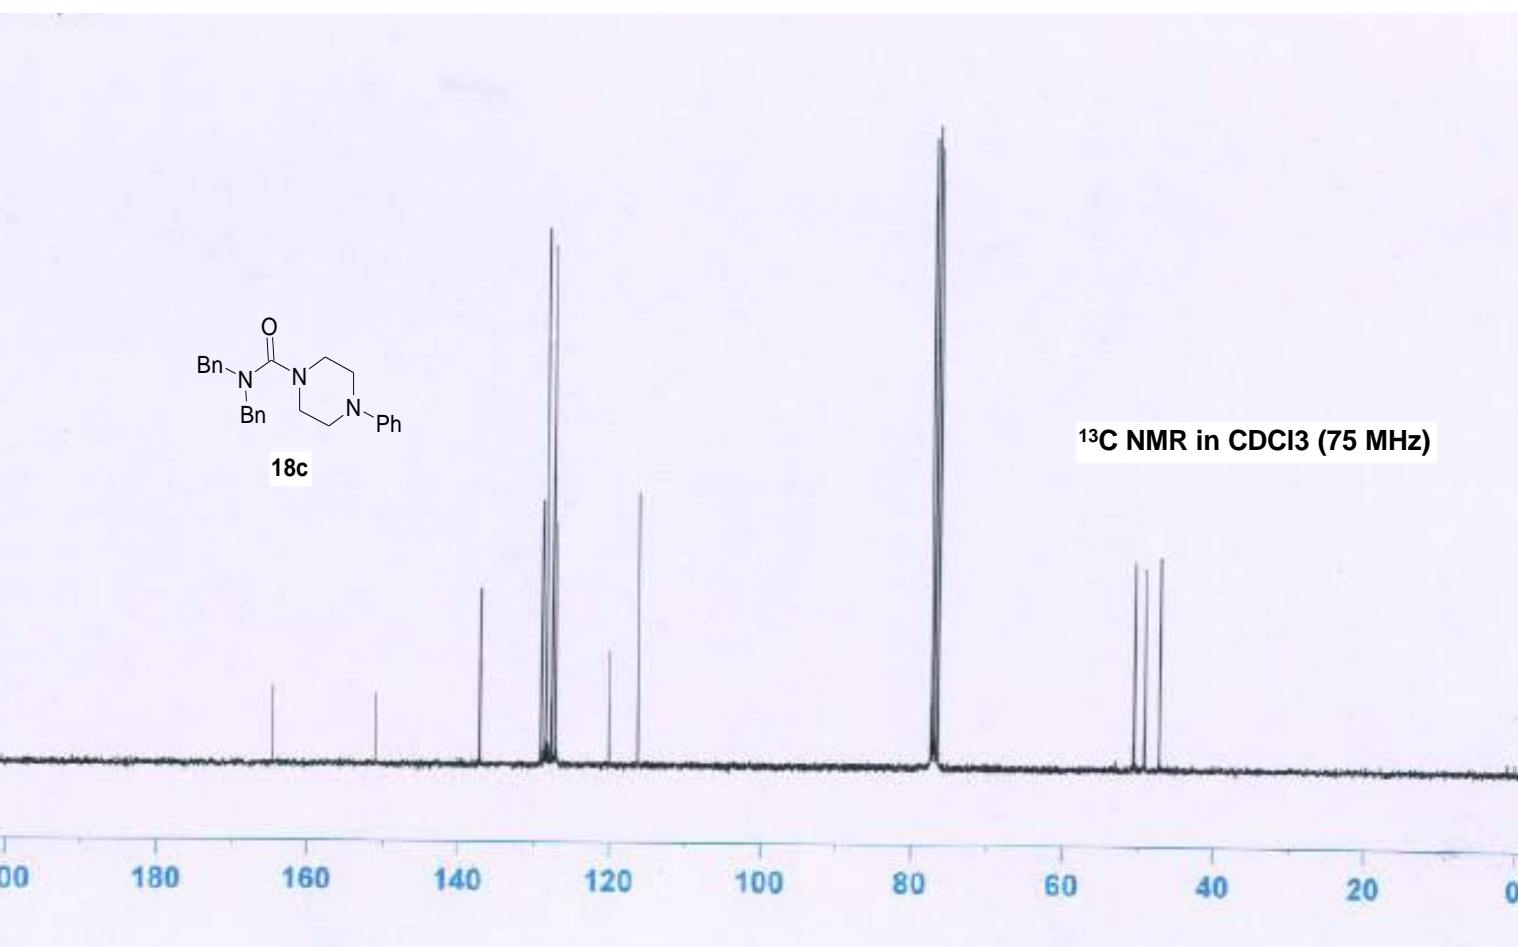

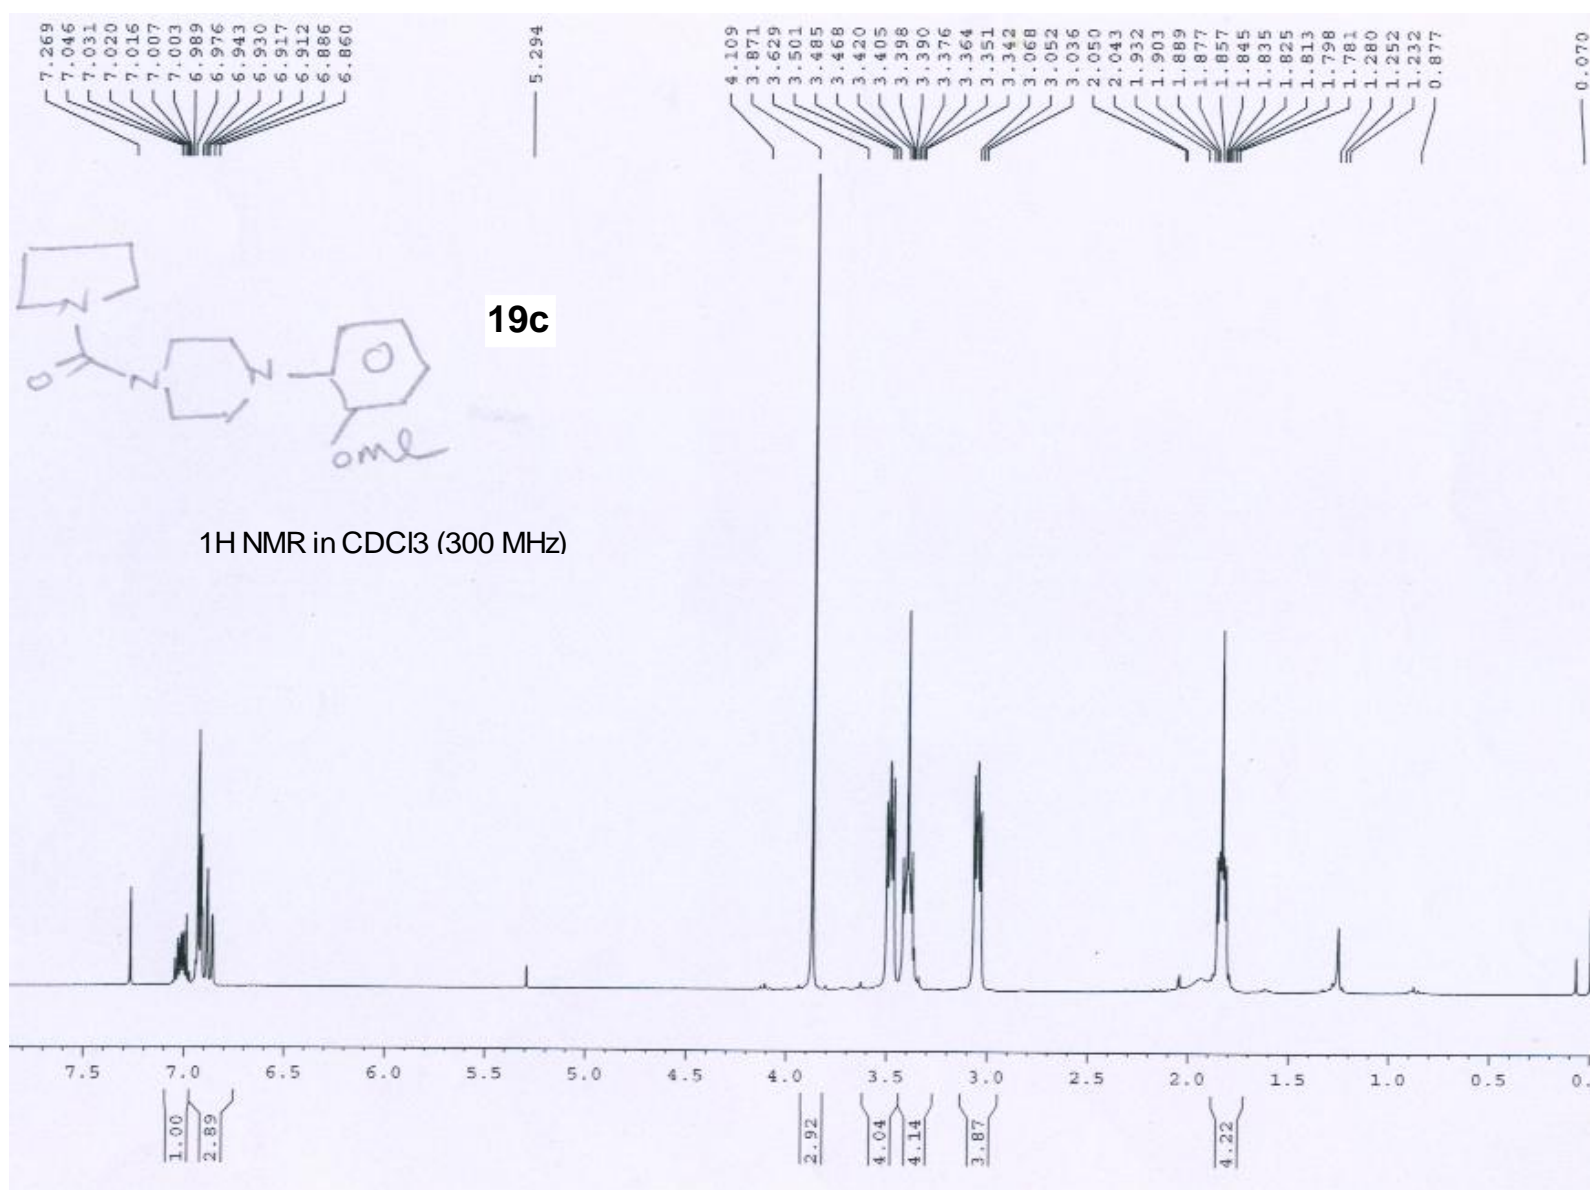

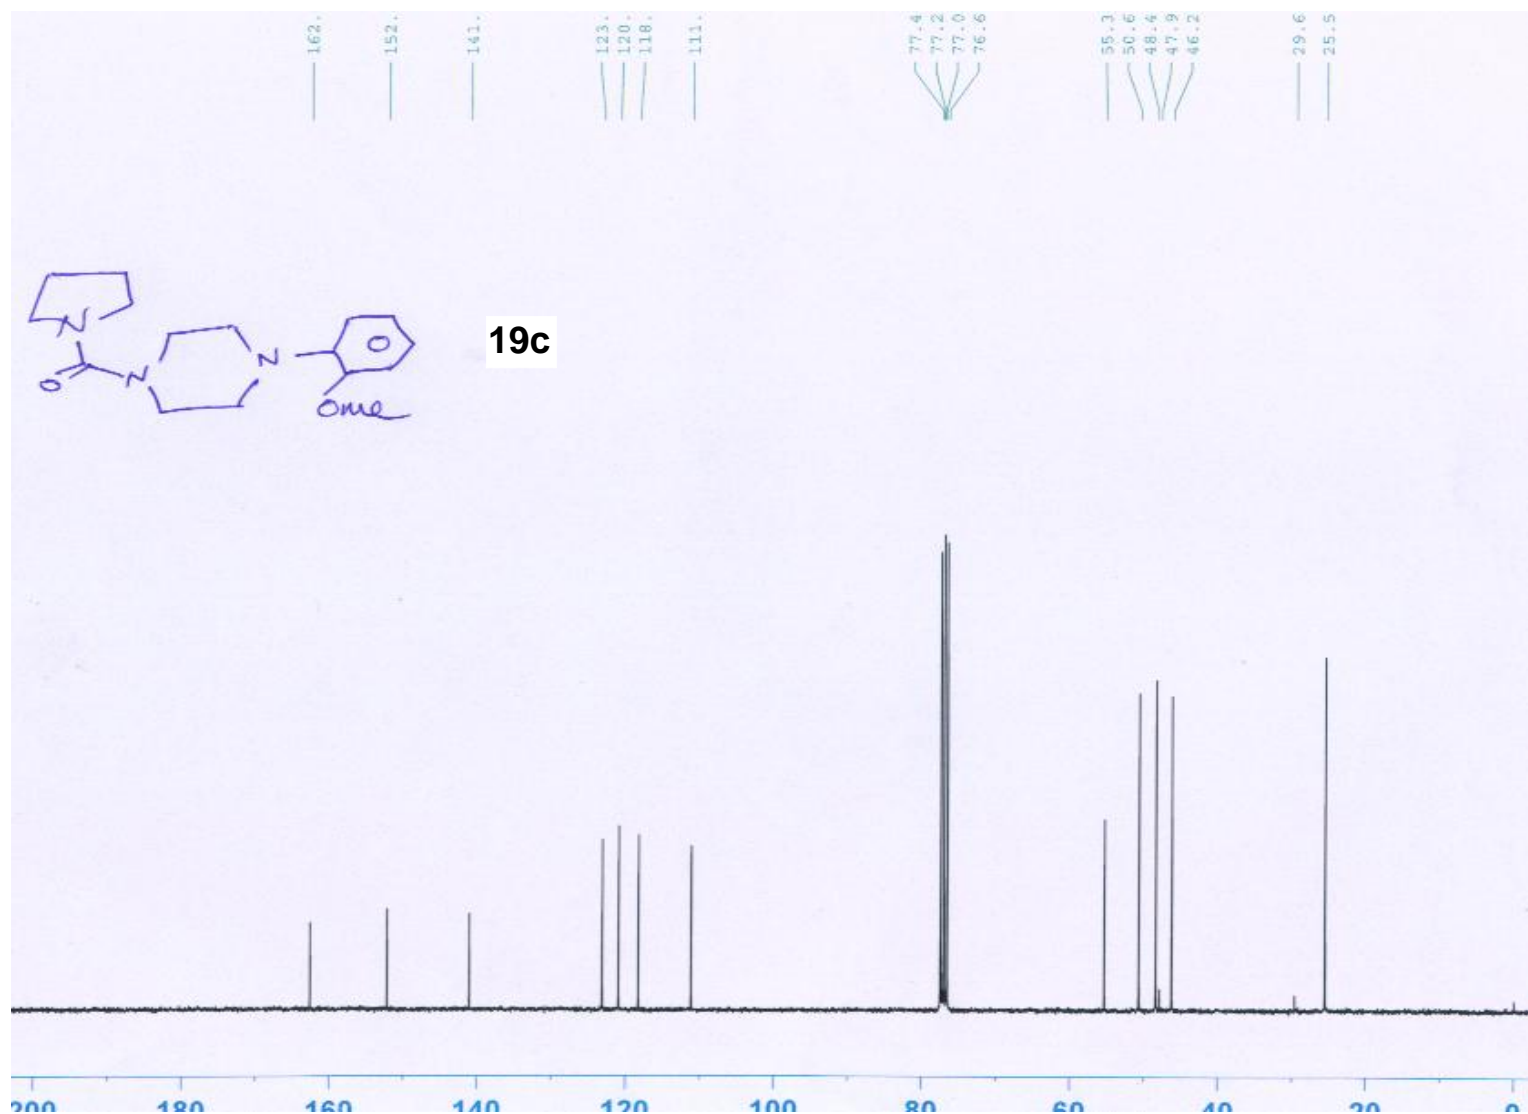



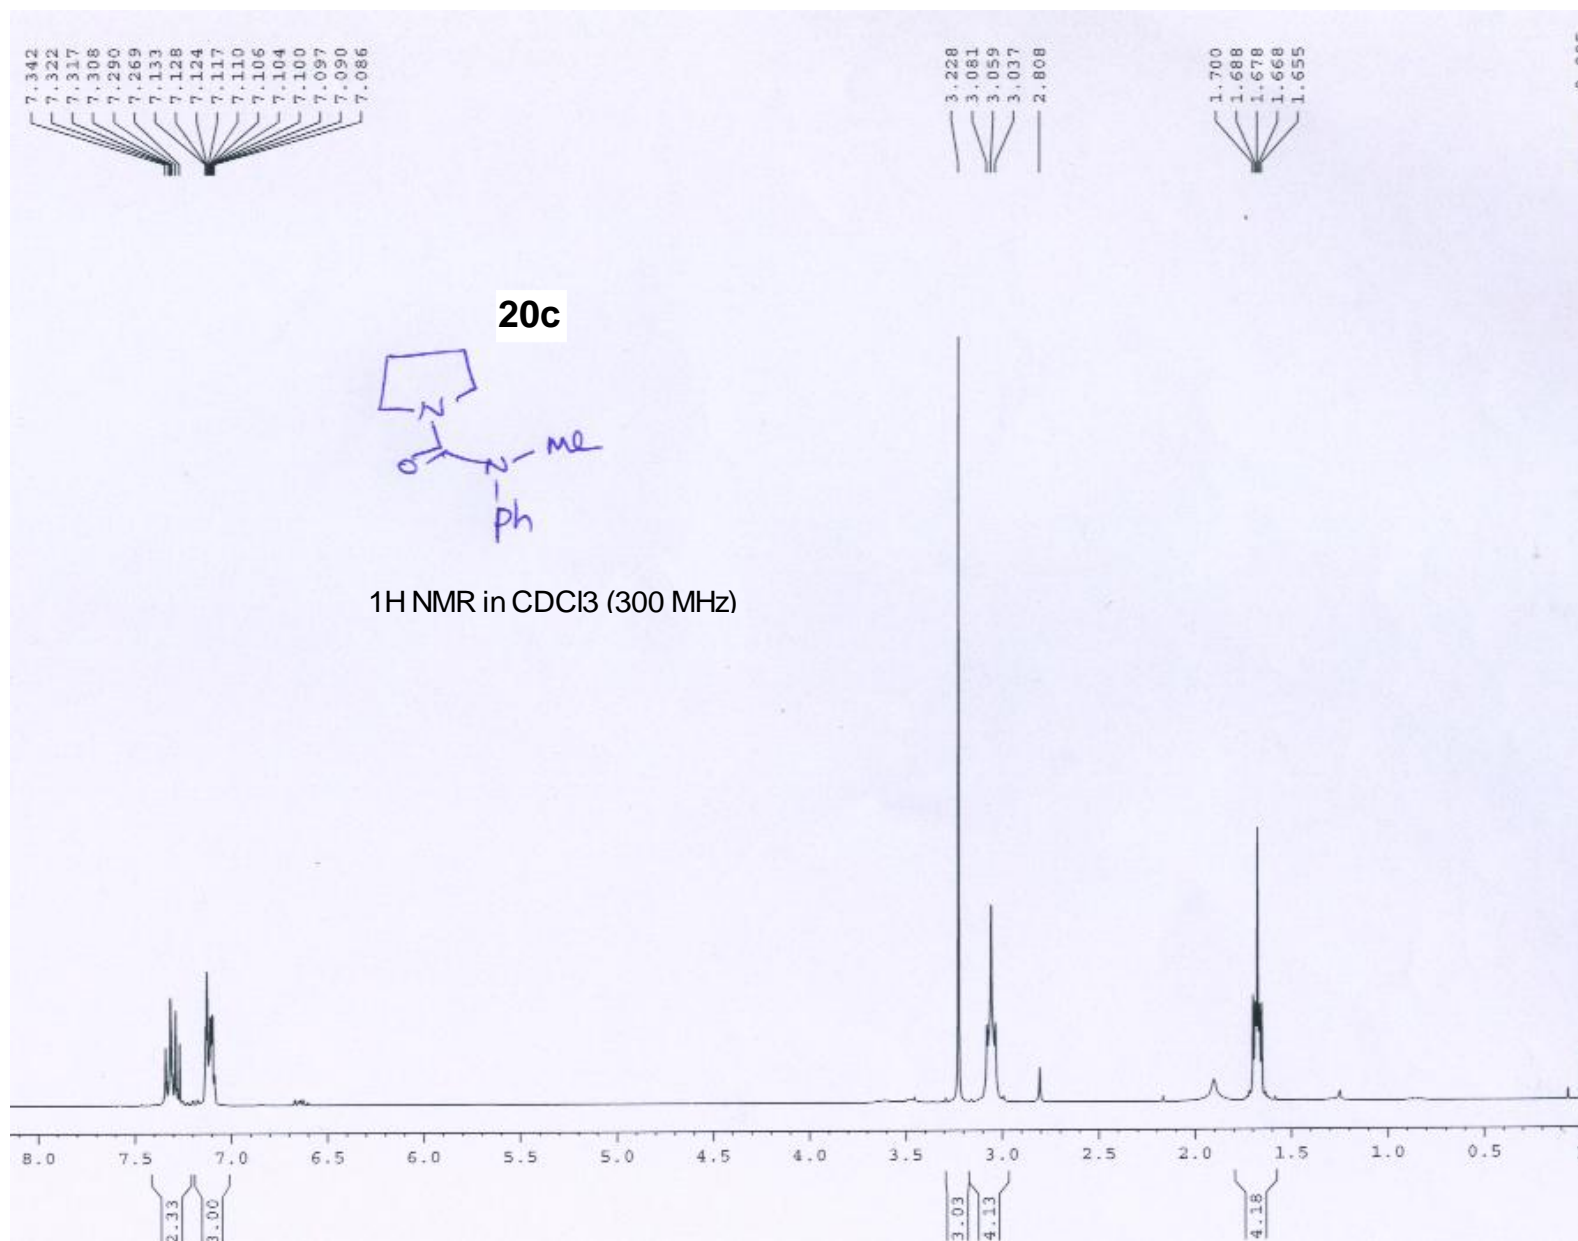



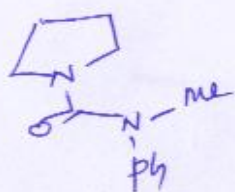

**20c**

**$^{13}\text{C}$  NMR in  $\text{CDCl}_3$  (75 MHz)**

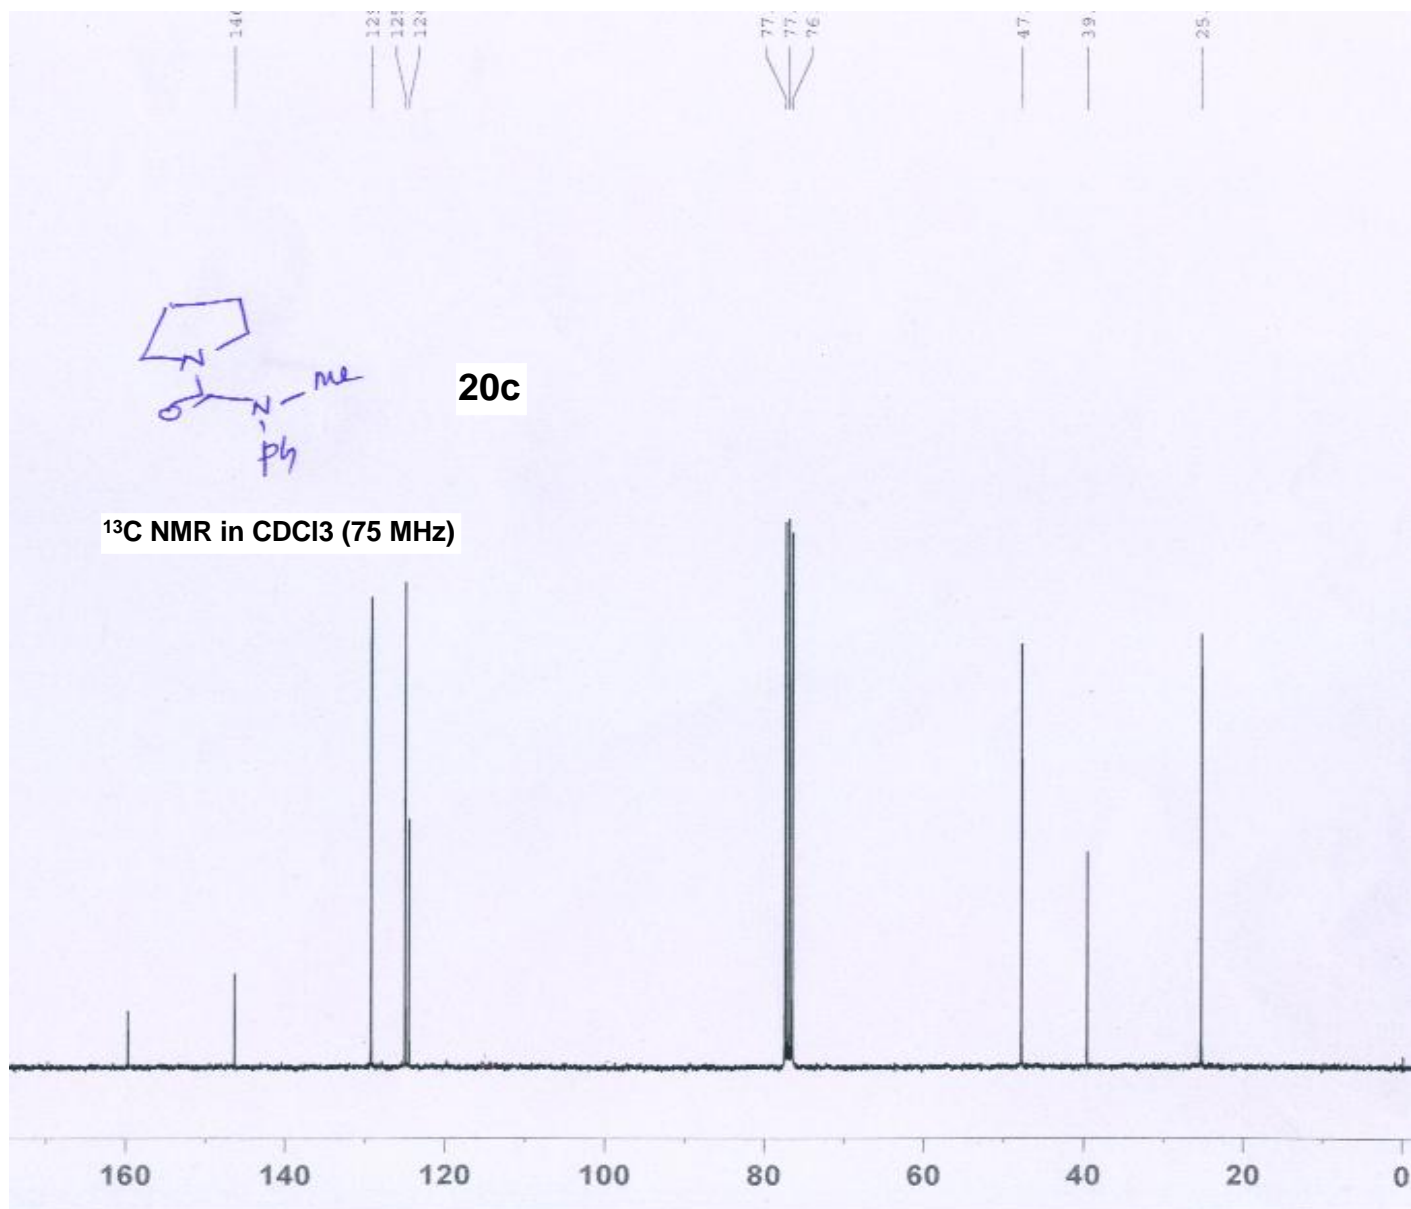

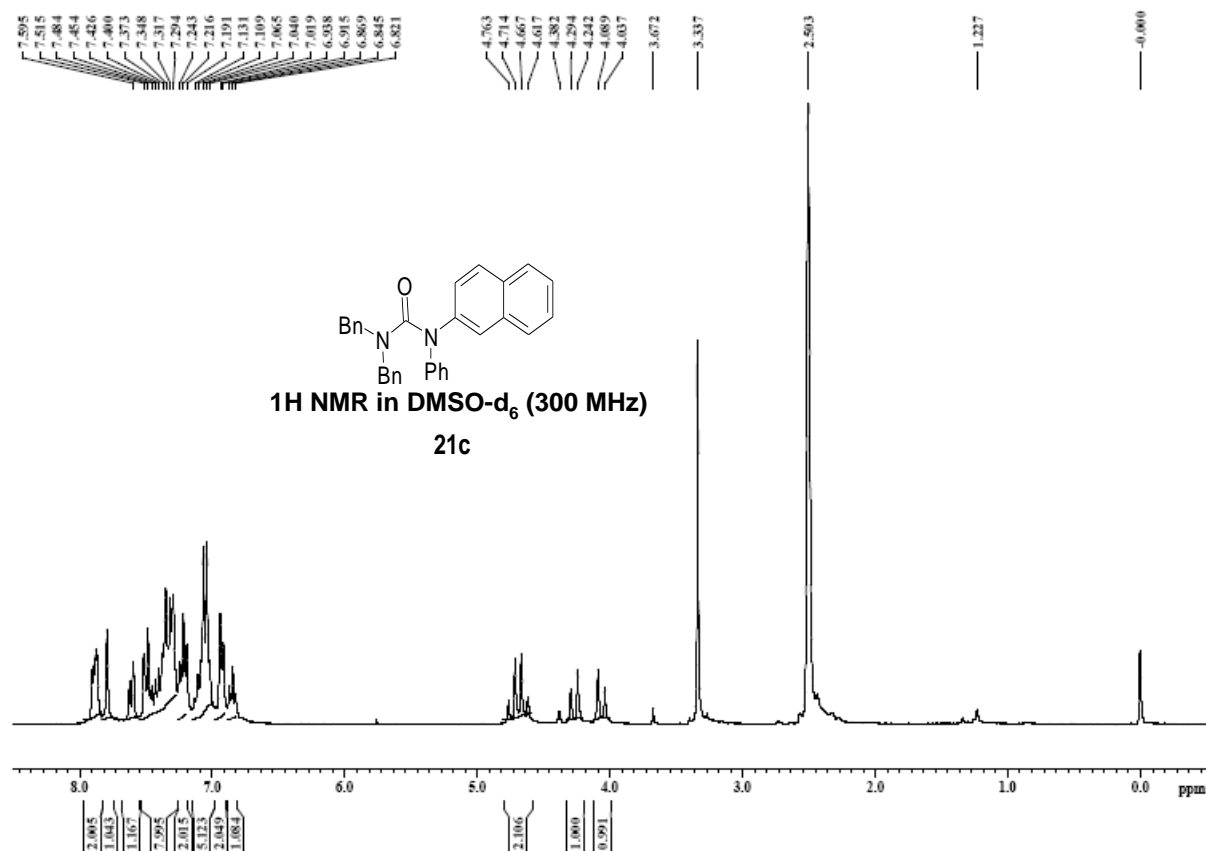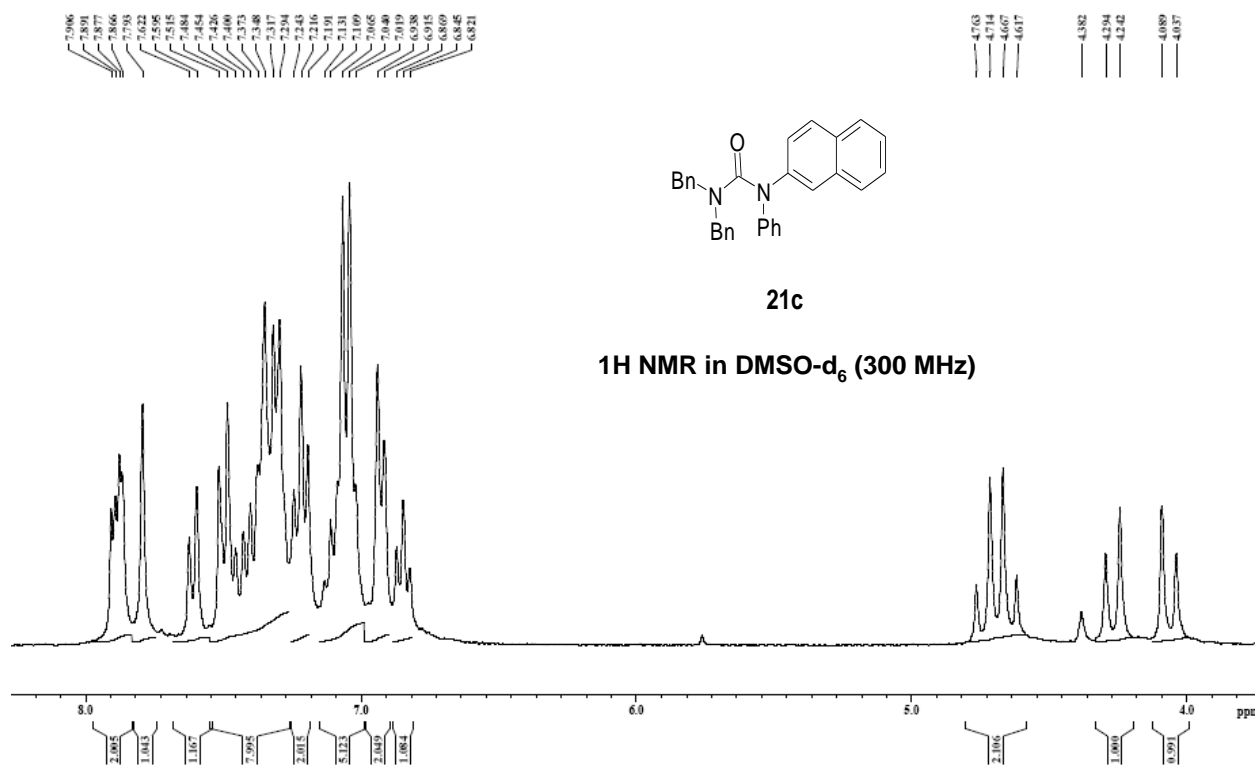

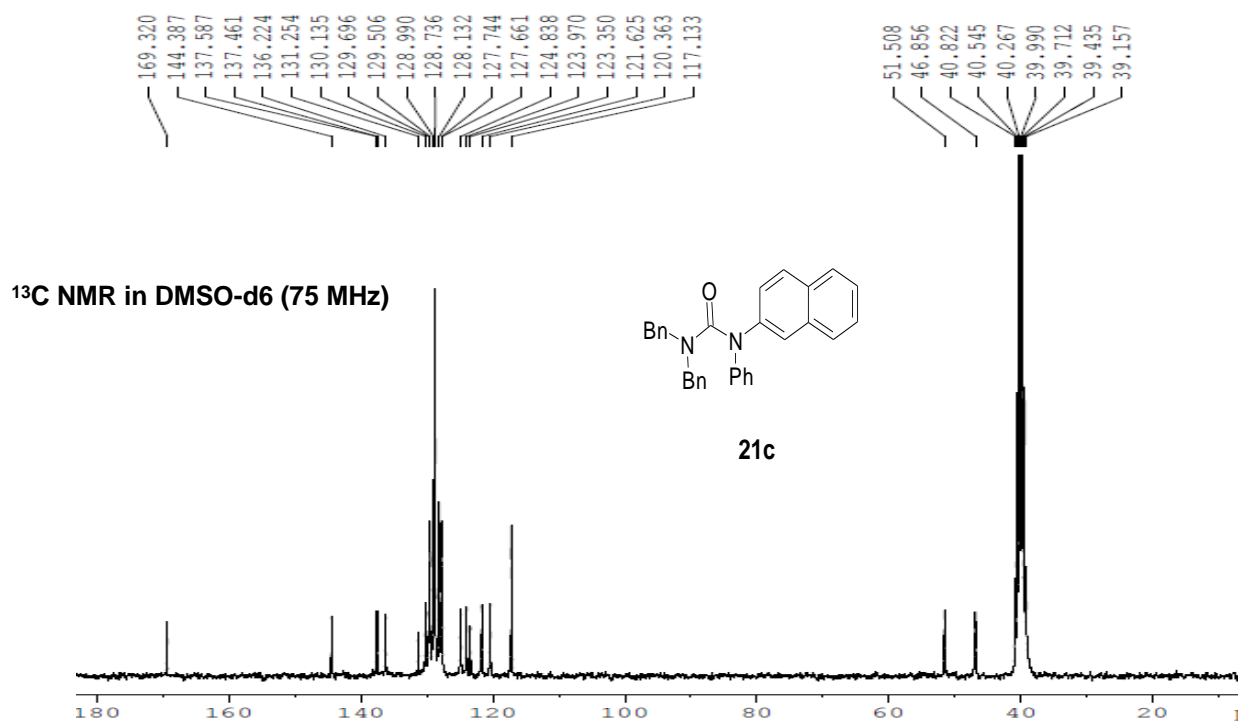

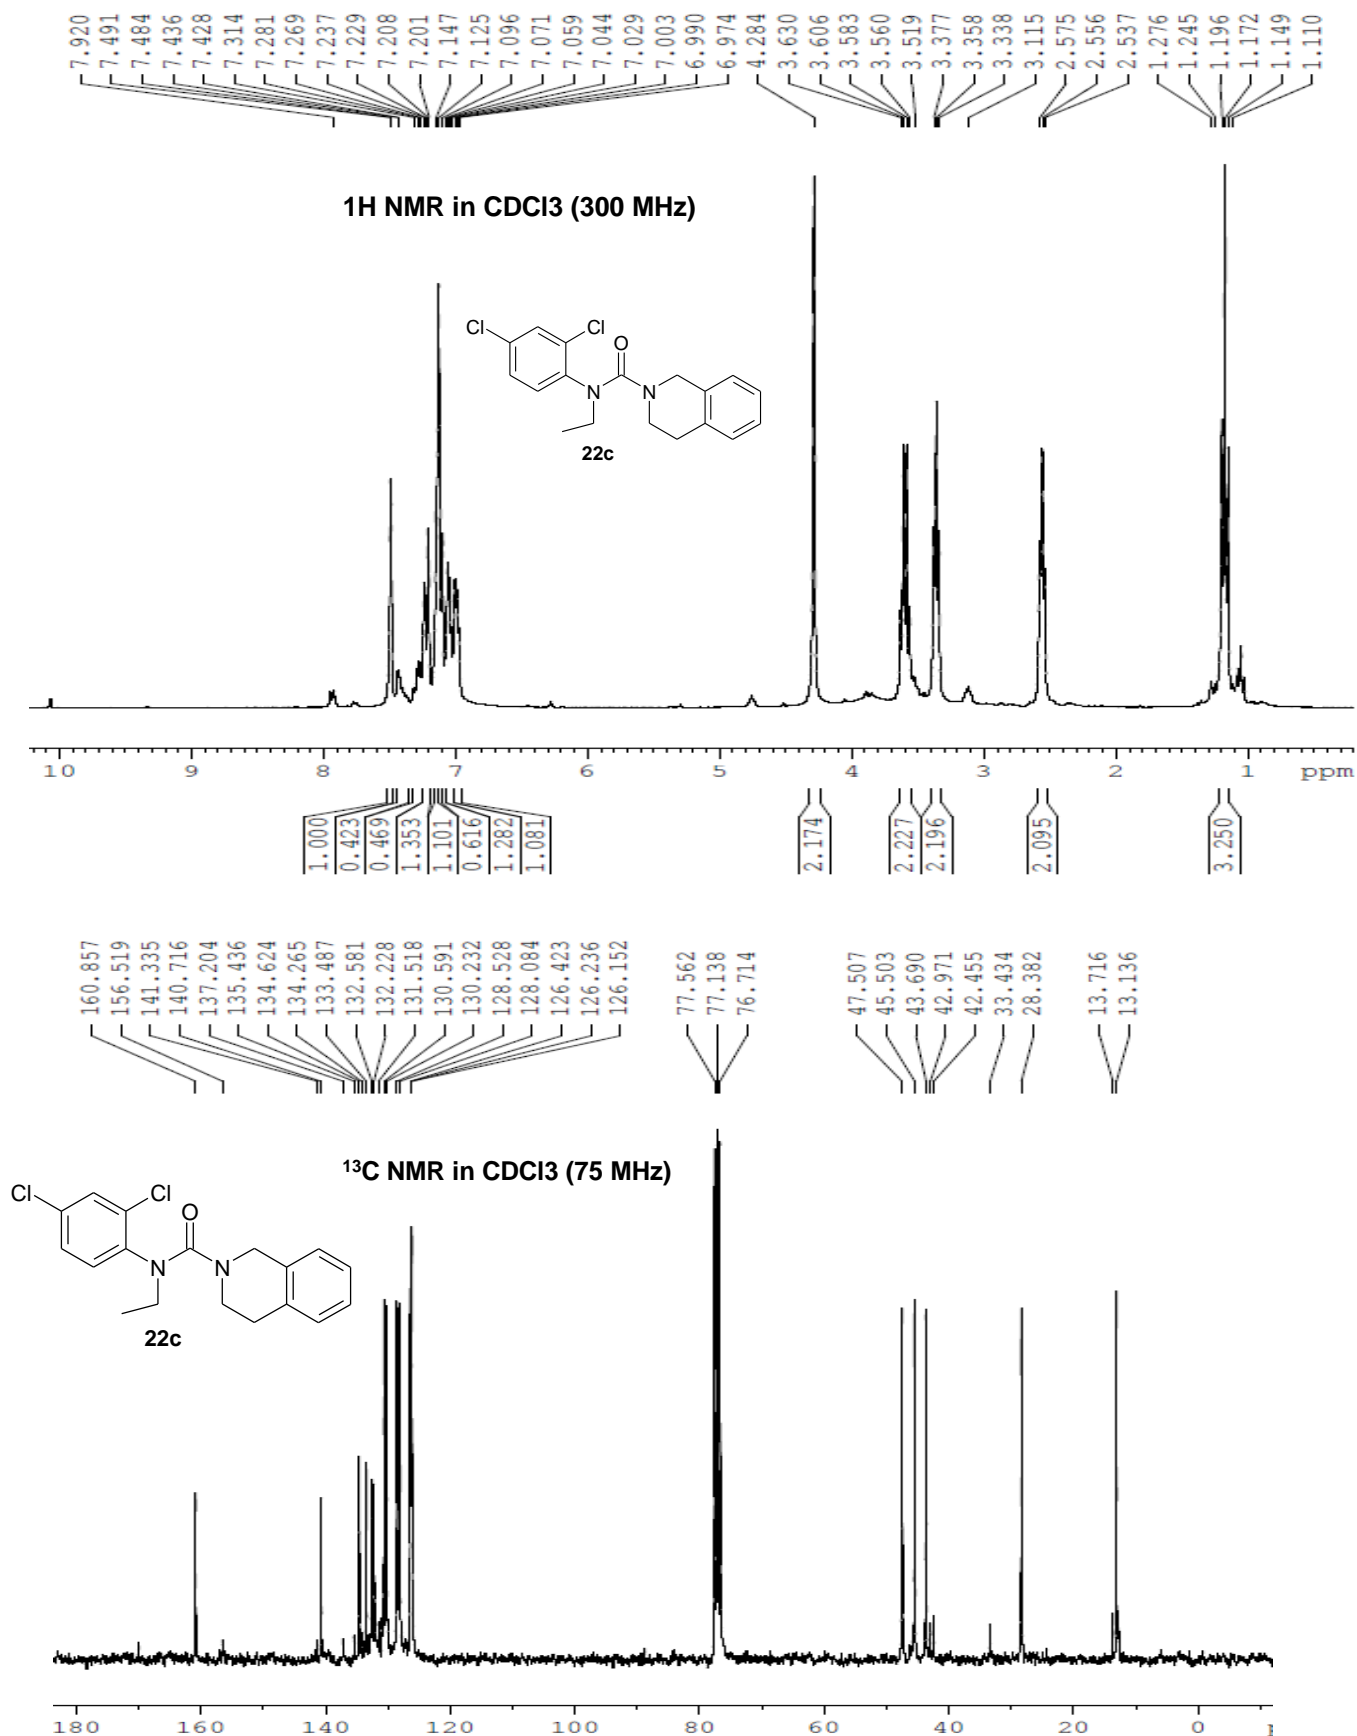

**<sup>1</sup>H NMR in DMSO-d<sub>6</sub> (300 MHz)**

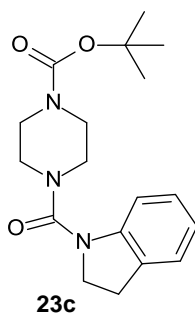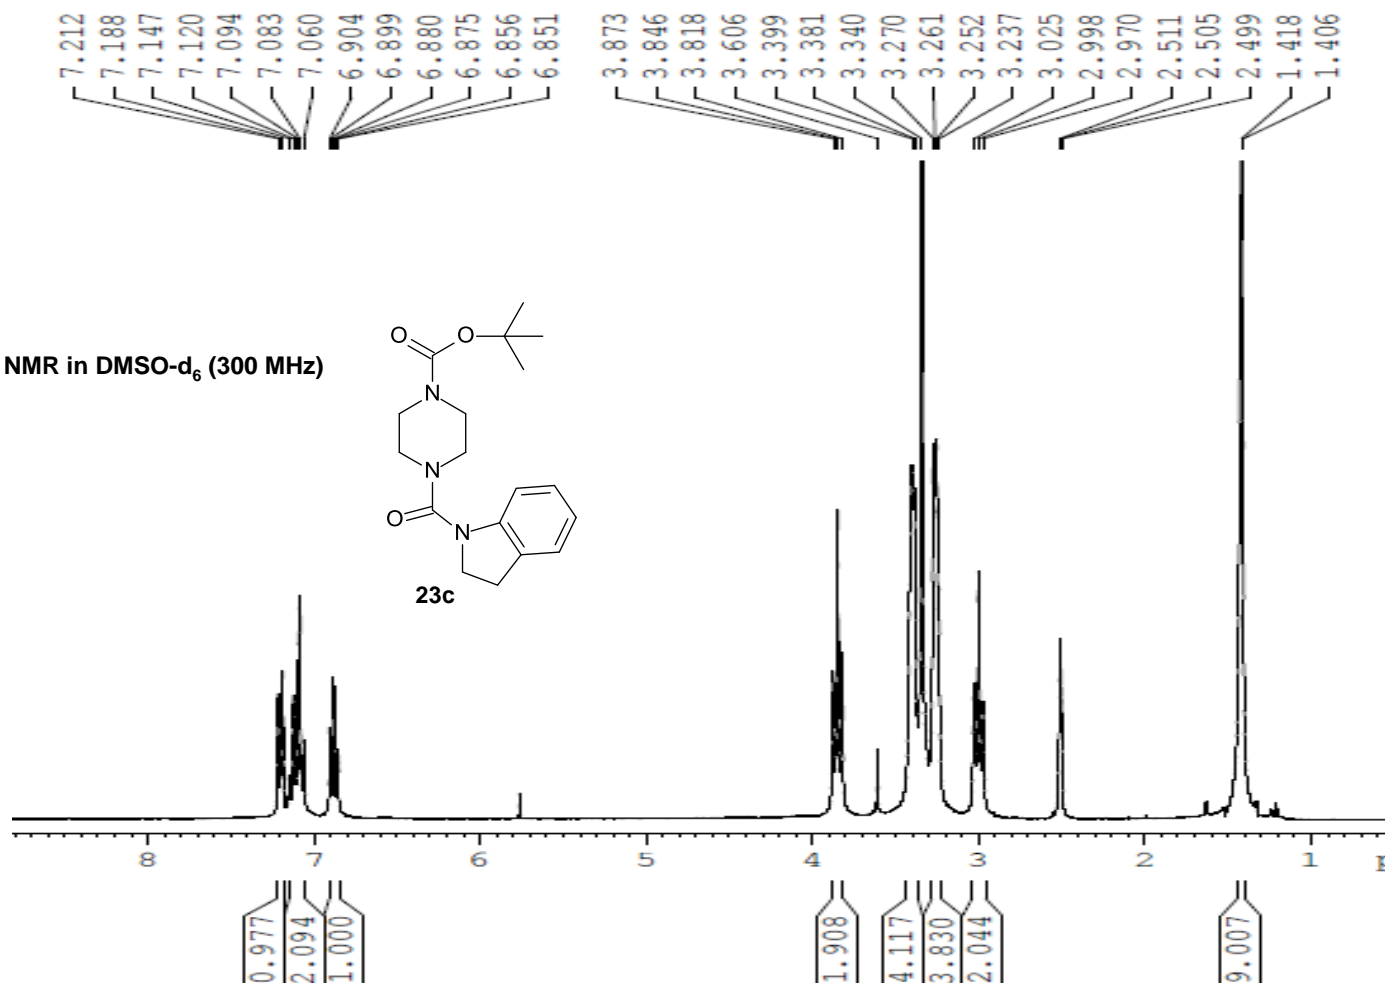

**<sup>13</sup>C NMR in DMSO-d<sub>6</sub> (75 MHz)**

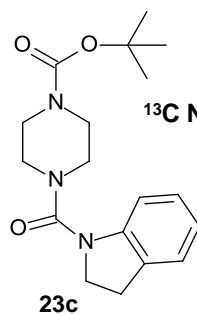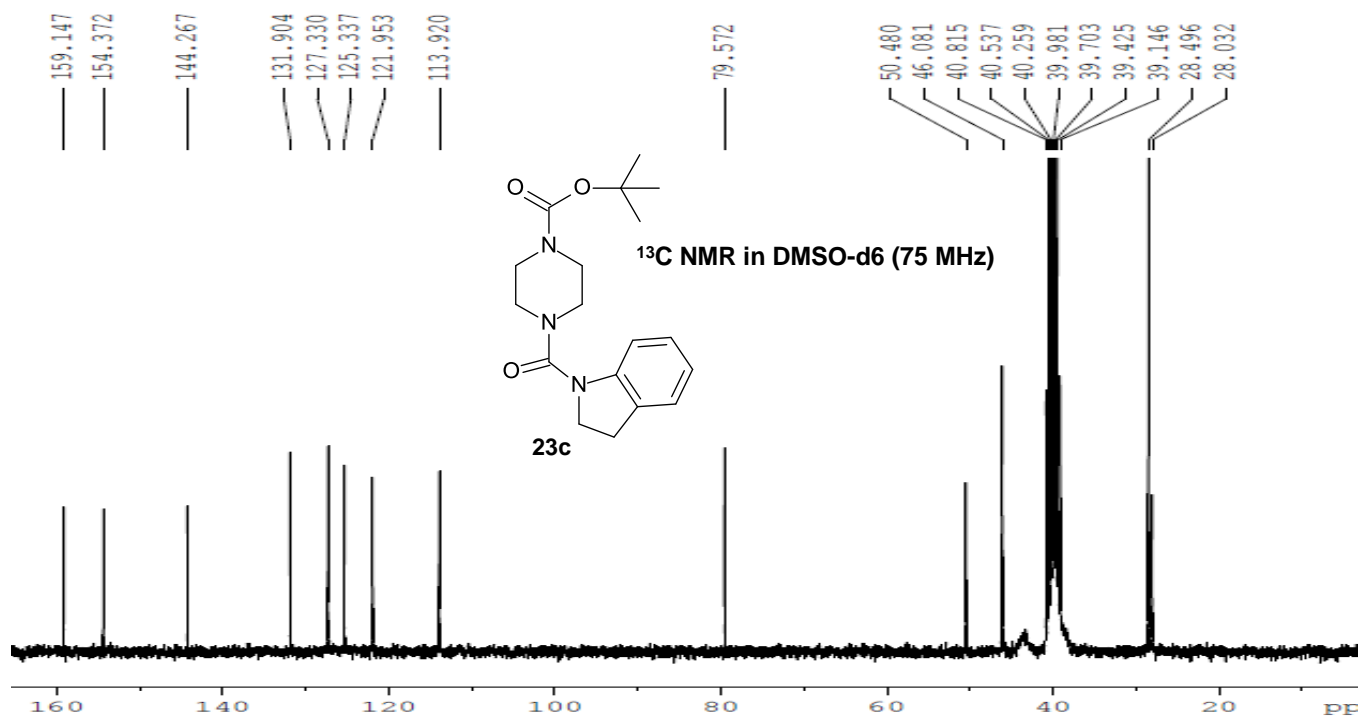

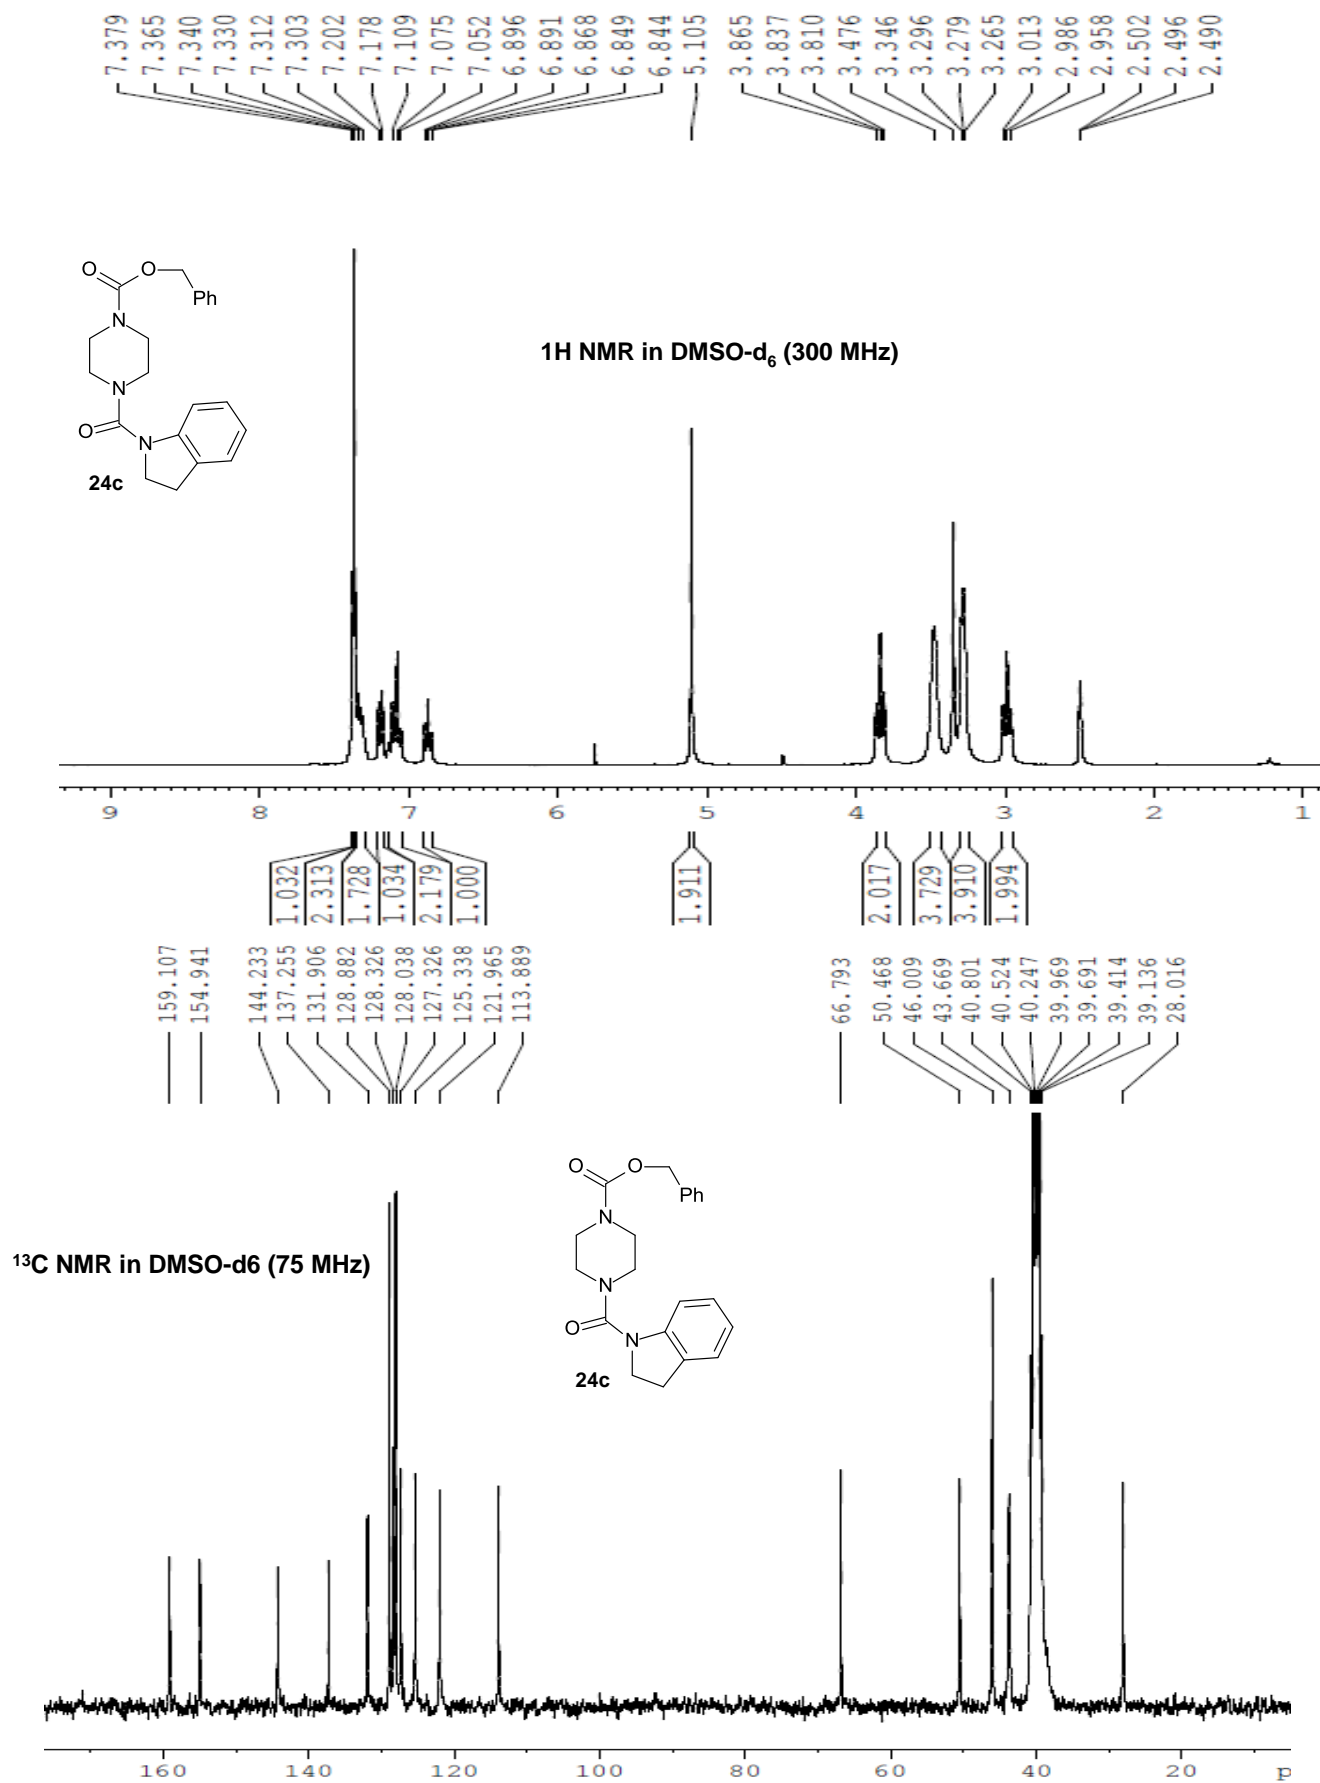

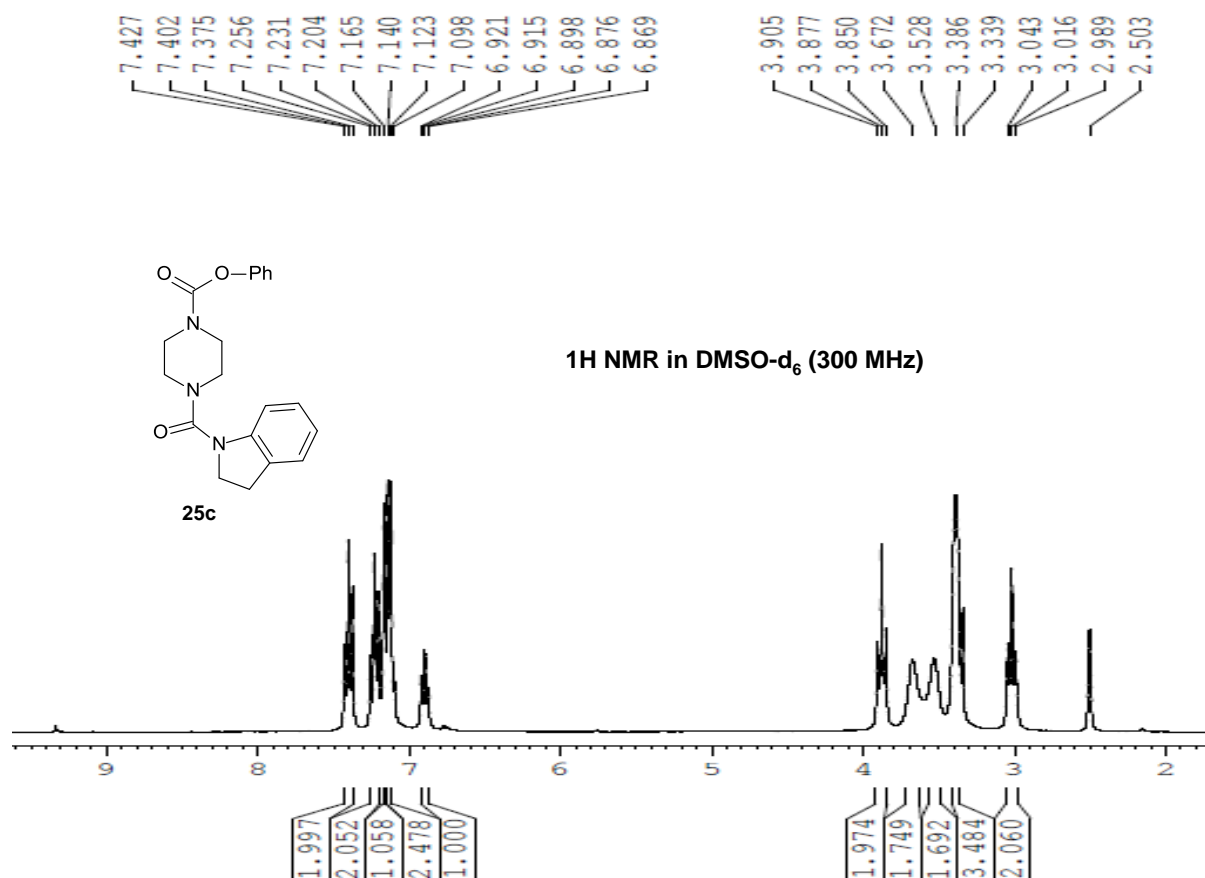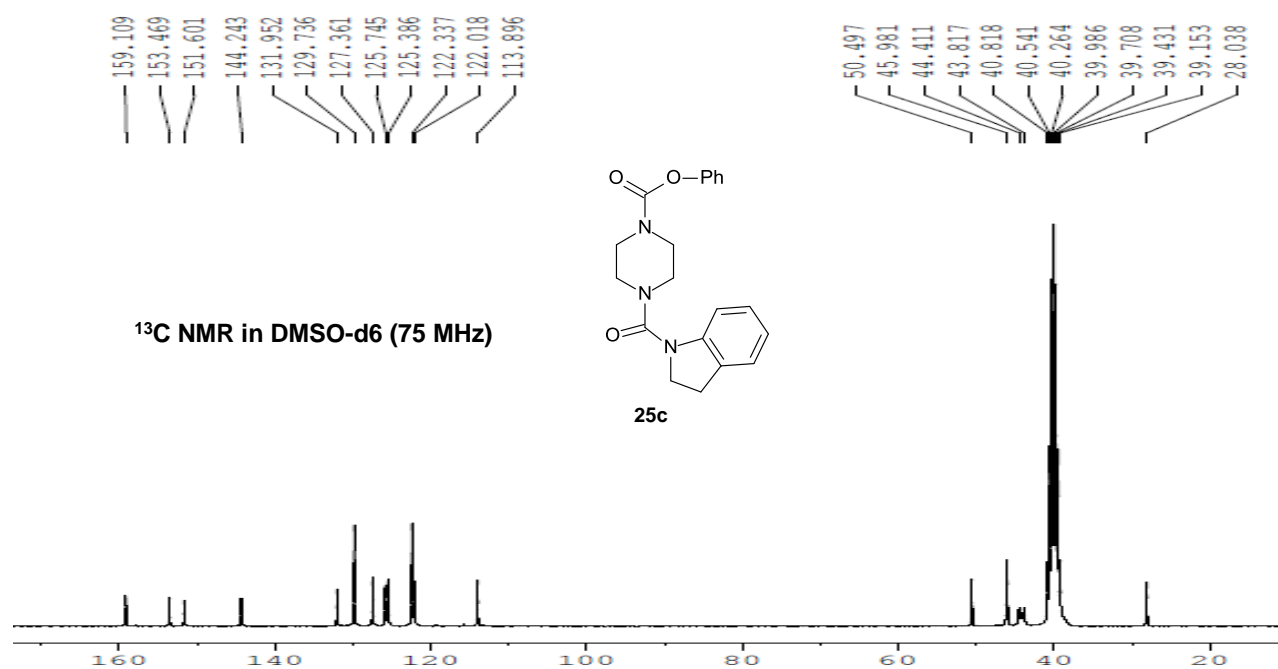

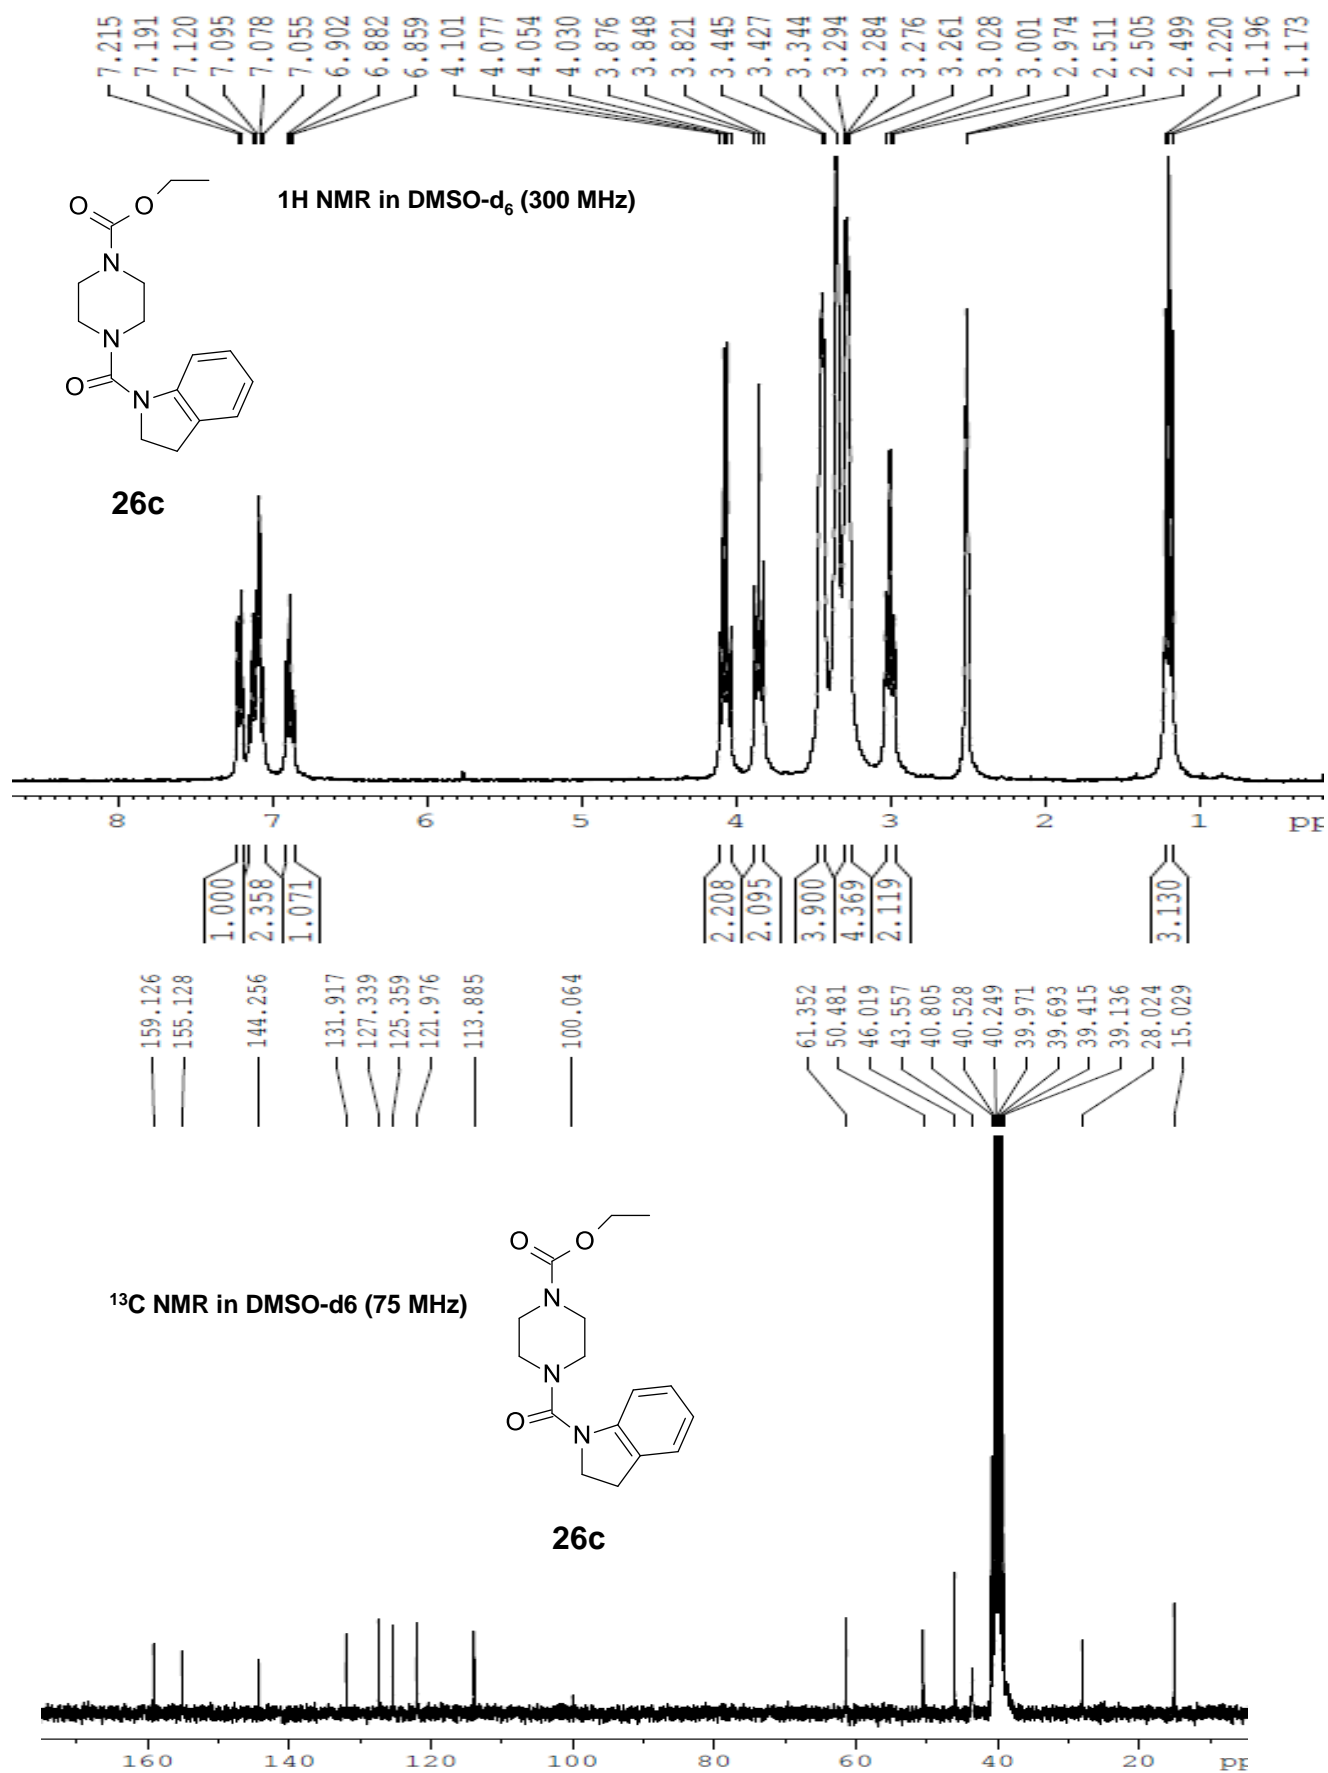



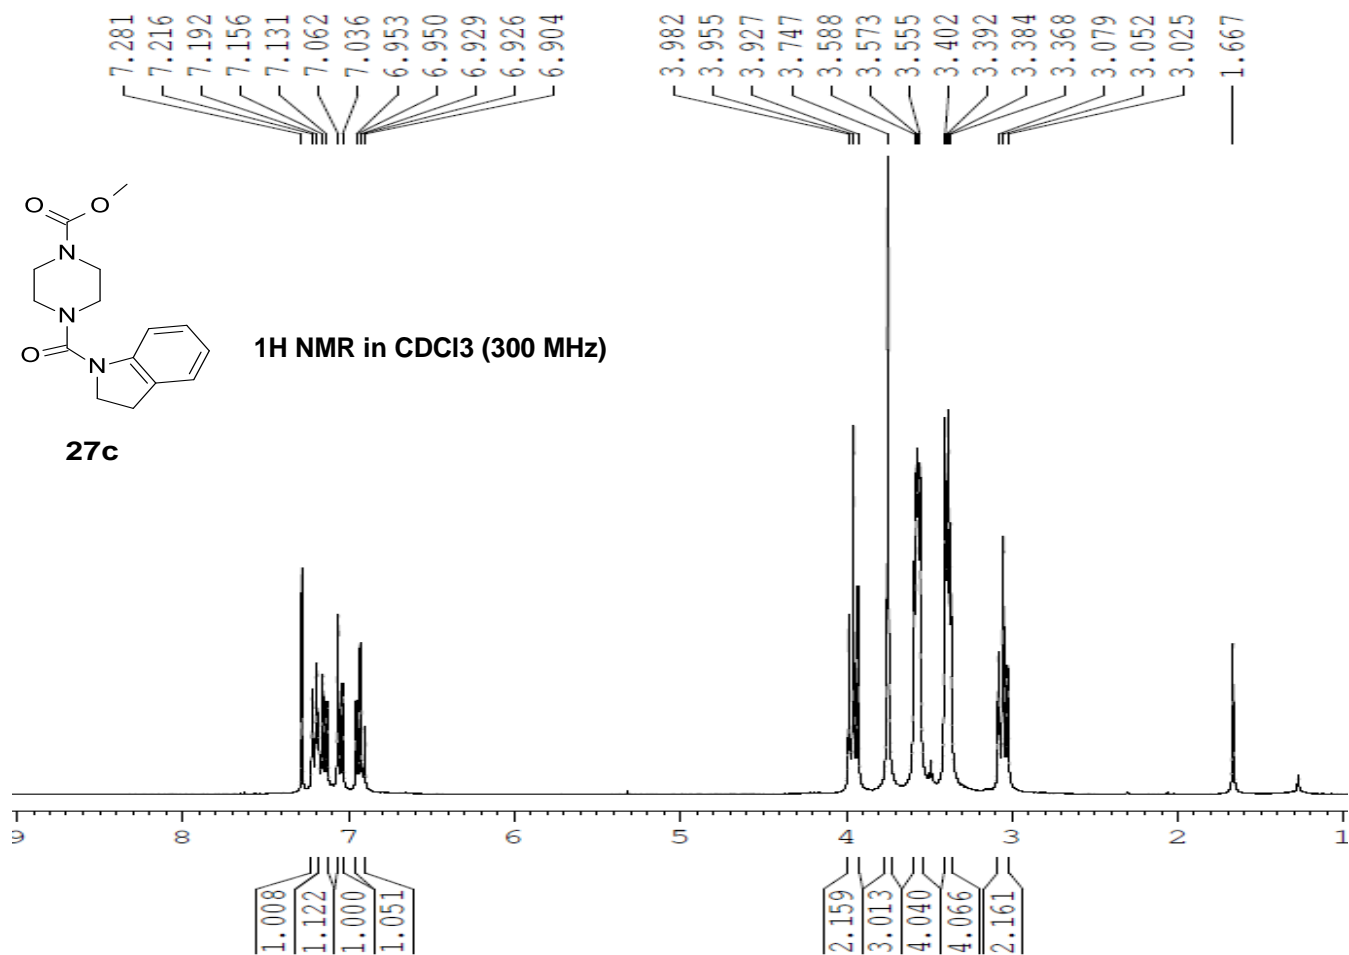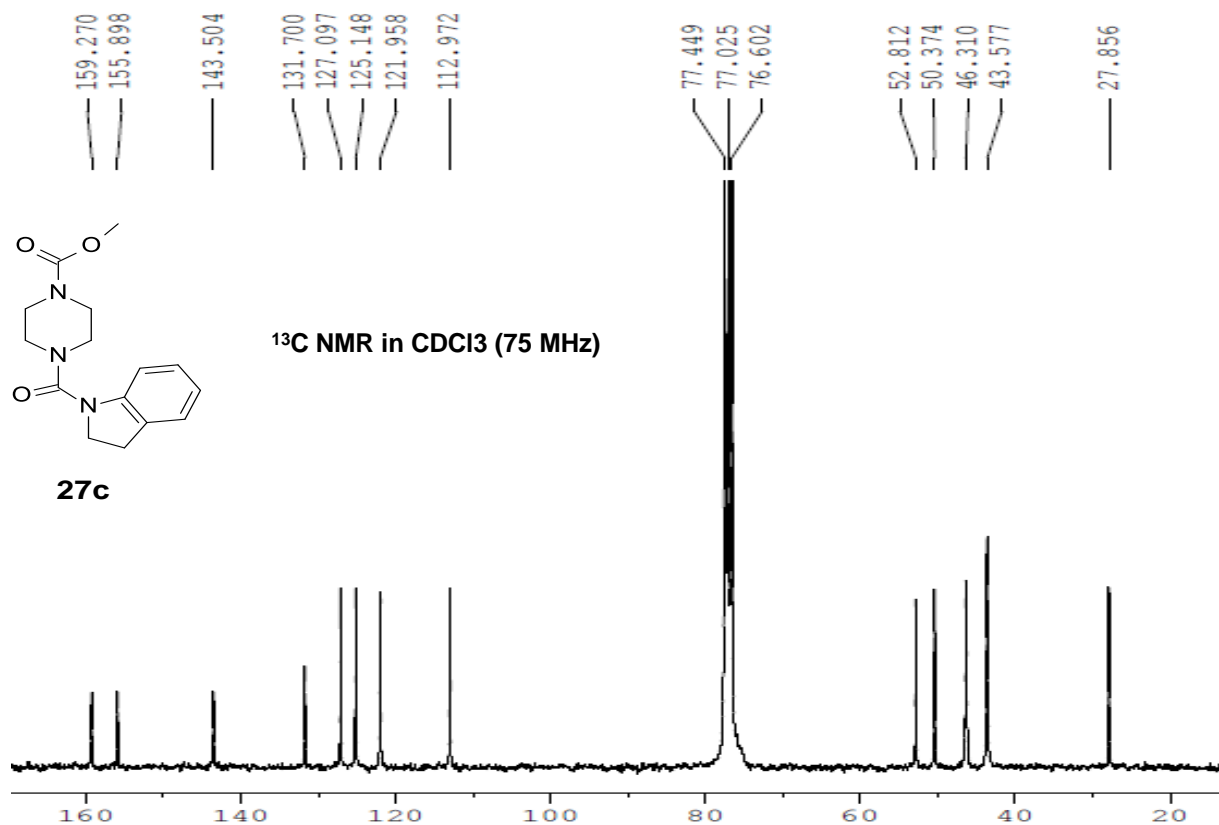

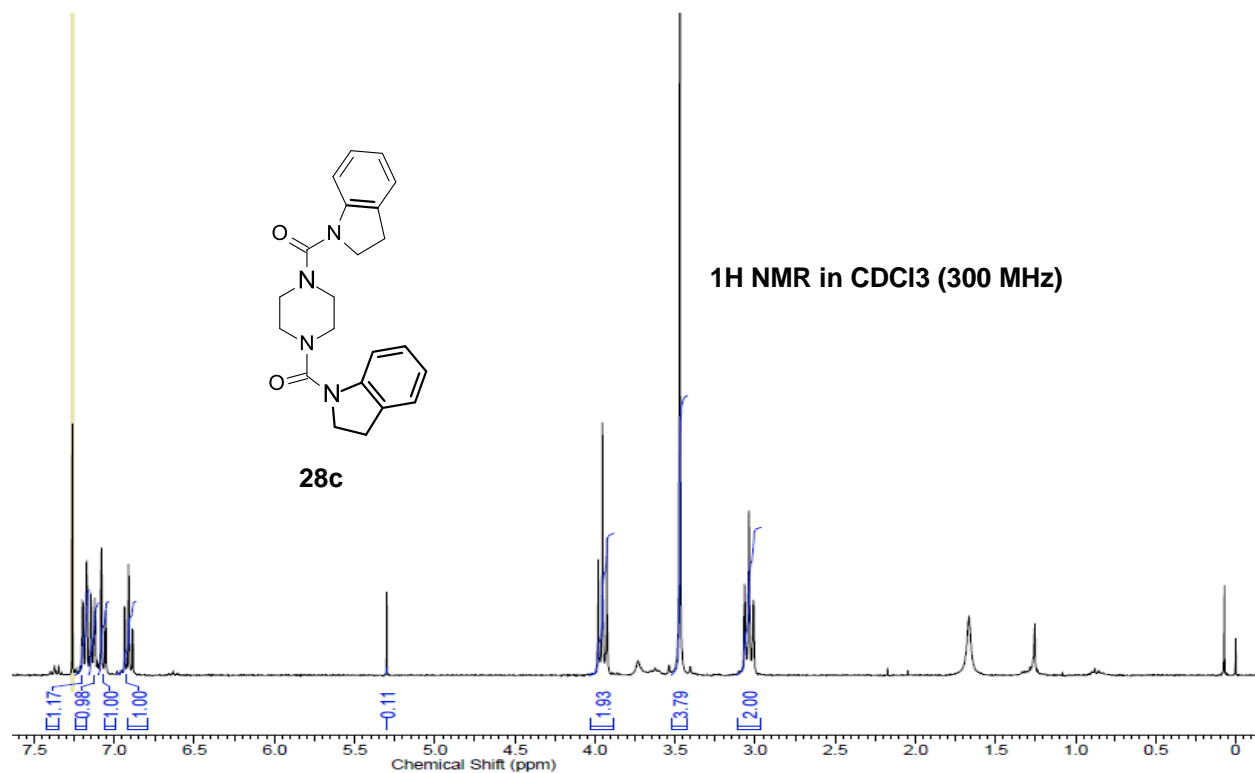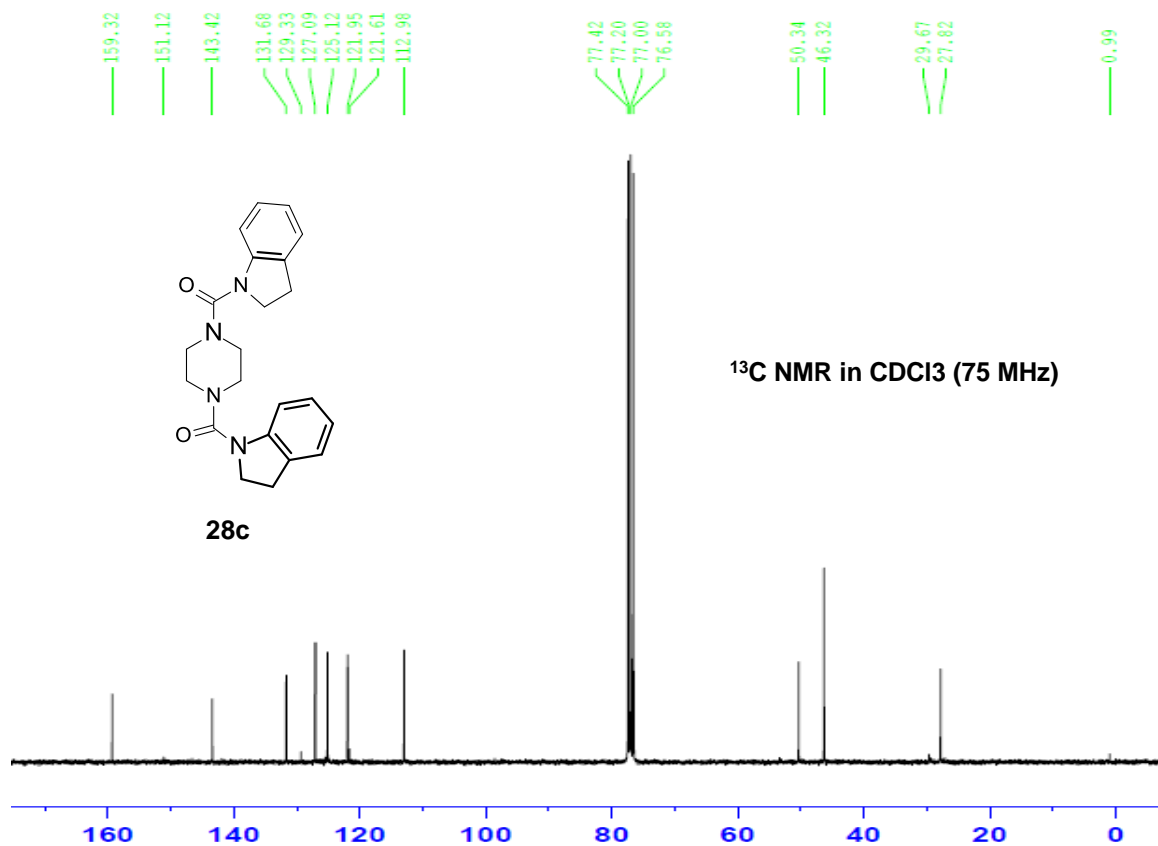

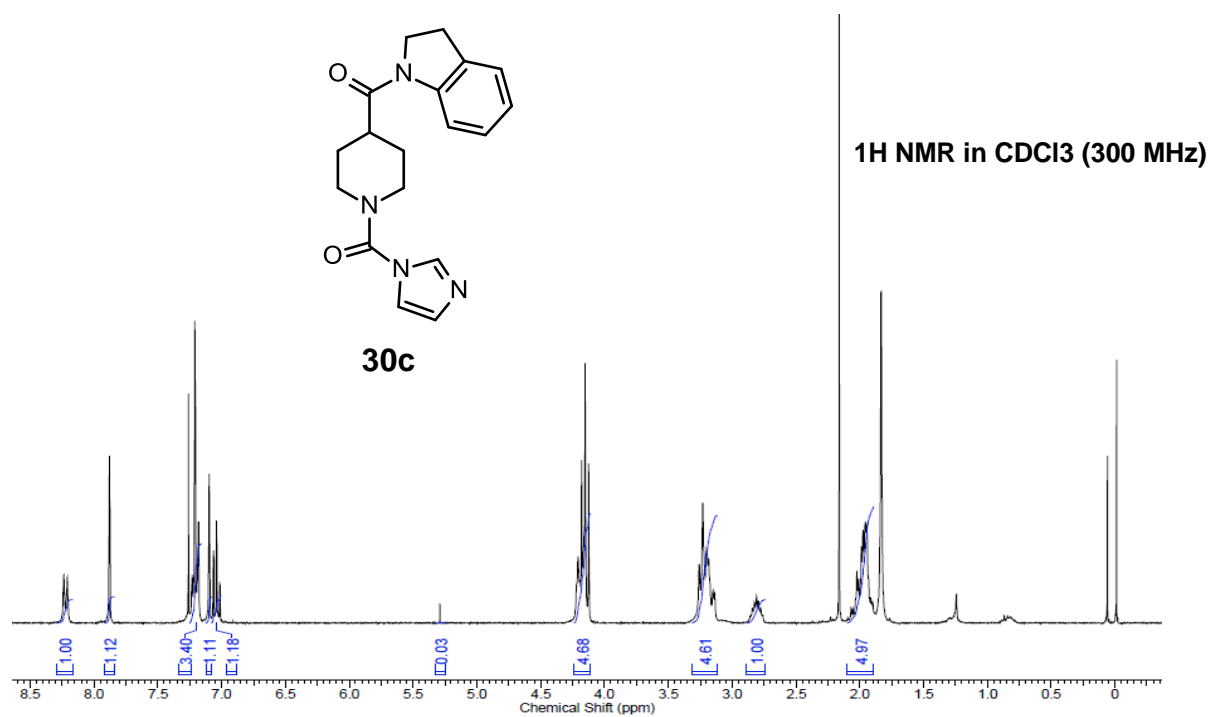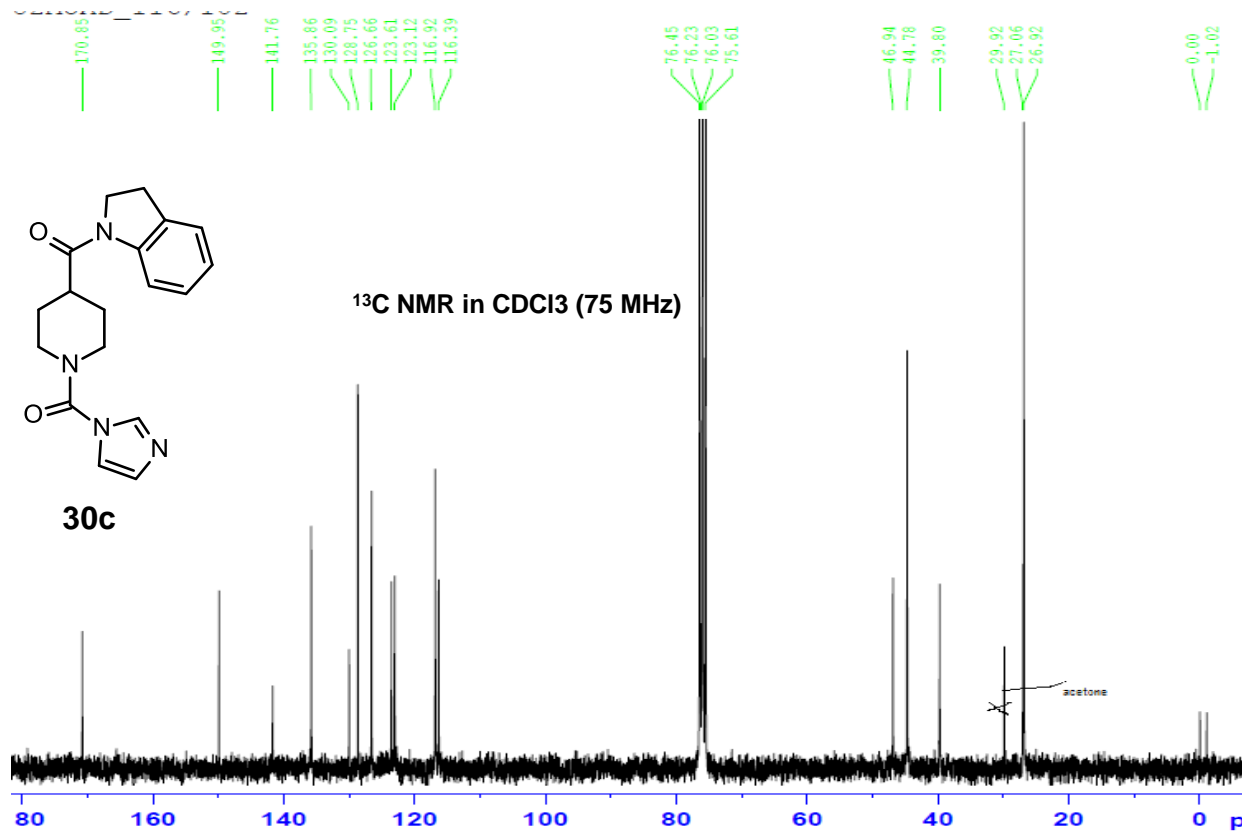

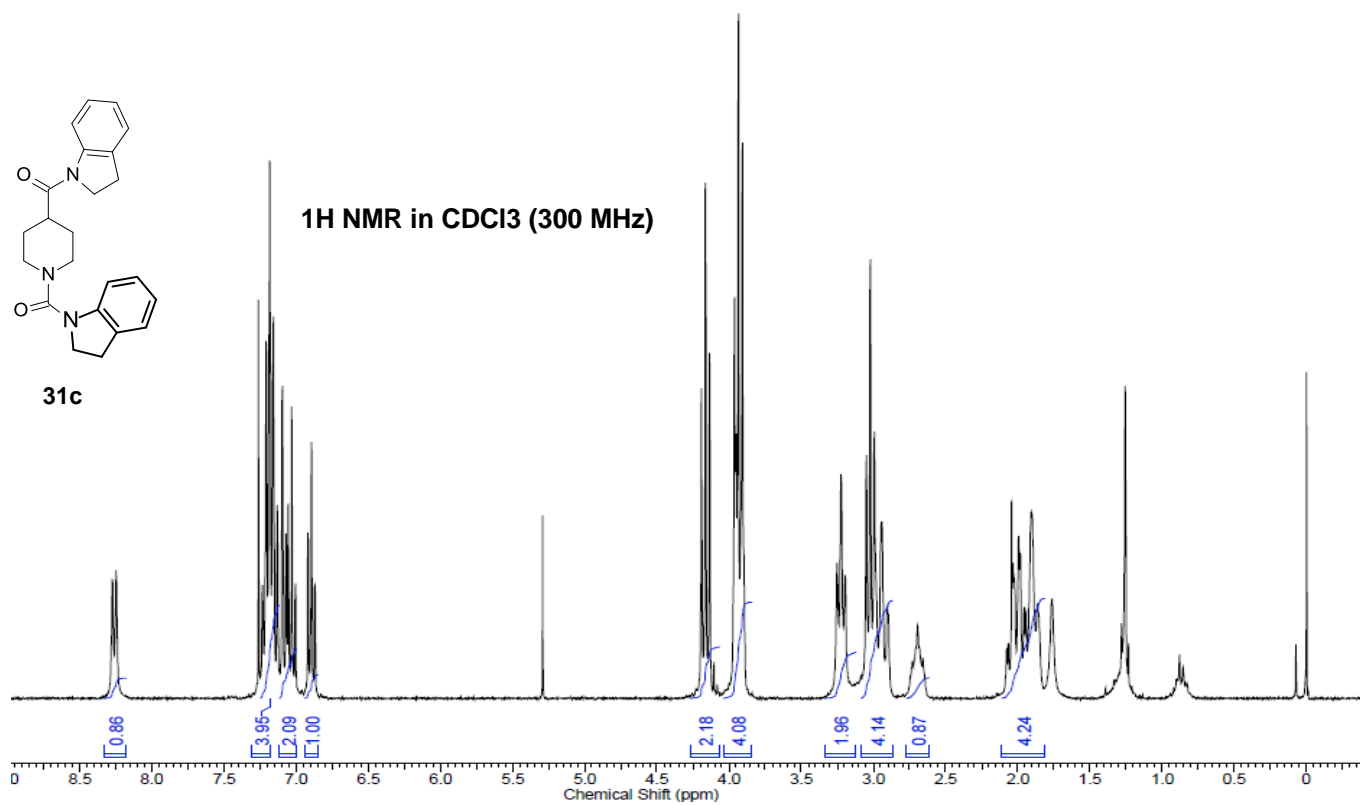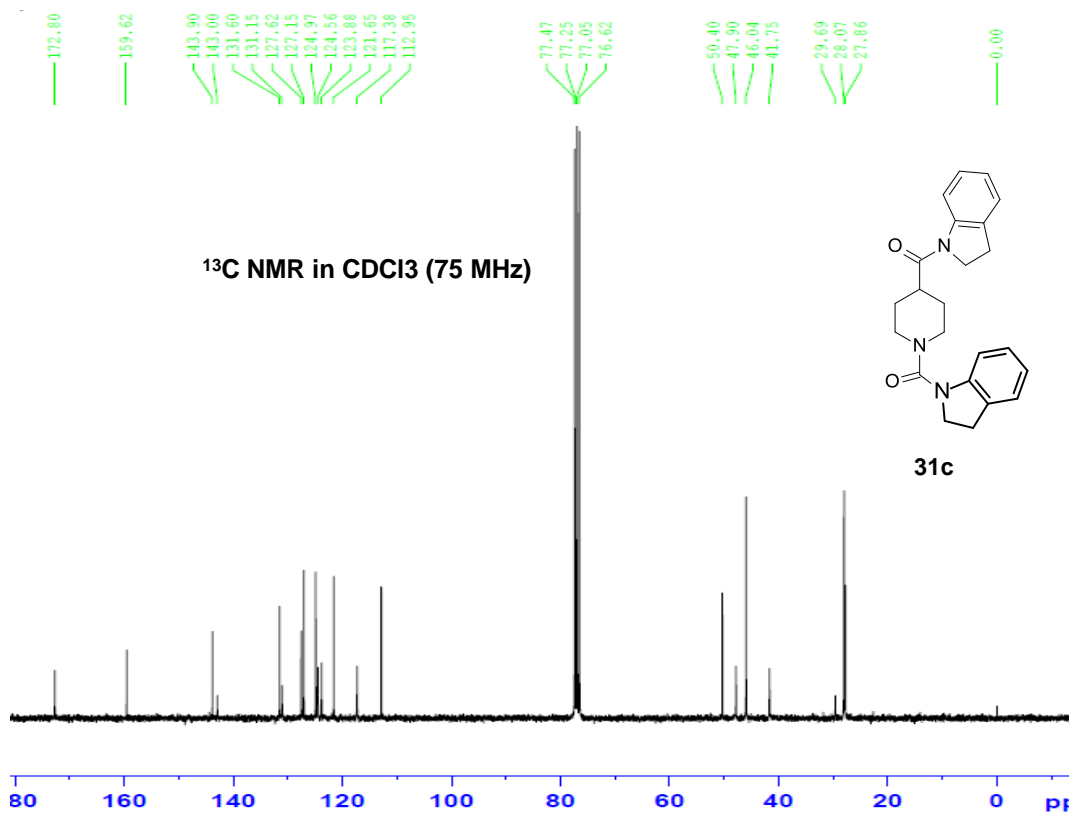

Supplement: c2ob25412c.pdf [file c2ob25412c.pdf]
